# Supplementary material
Source: publisher site journal article supplement (https://www.spandidos-publications.com/4604/downloadSupplementary)
Supplement: Supplementary file 1 [file downloadSupplementary]

## Sheet: out.bar_Gradient
Table SIX. GO analysis up specific
id	num	pvalue	per	ratio	class	ID	Descrption	Pvalue	Qvalue	Up	Down	fg_num	bg_num
GO:0009653 anatomical structure morphogenesis	173	2.28379e-08	22.614	0.064	Biological Process	GO:0009653	anatomical structure morphogenesis	2.28379e-08	0.000160619	0	0	173	2703
GO:0071900 regulation of protein serine/threonine kinase activity	50	5.33052e-08	6.536	0.098	Biological Process	GO:0071900	regulation of protein serine/threonine kinase activity	5.33052e-08	0.000187448	0	0	50	510
GO:0048522 positive regulation of cellular process	306	1.53308e-07	40	0.055	Biological Process	GO:0048522	positive regulation of cellular process	1.53308e-07	0.000359406	0	0	306	5566
GO:0048523 negative regulation of cellular process	275	3.23523e-07	35.948	0.056	Biological Process	GO:0048523	negative regulation of cellular process	3.23523e-07	0.000543275	0	0	275	4934
GO:0008630 intrinsic apoptotic signaling pathway in response to DNA damage	18	4.41626e-07	2.353	0.173	Biological Process	GO:0008630	intrinsic apoptotic signaling pathway in response to DNA damage	4.41626e-07	0.000543275	0	0	18	104
GO:0051173 positive regulation of nitrogen compound metabolic process	193	4.83721e-07	25.229	0.06	Biological Process	GO:0051173	positive regulation of nitrogen compound metabolic process	4.83721e-07	0.000543275	0	0	193	3231
GO:0051093 negative regulation of developmental process	76	5.40726e-07	9.935	0.077	Biological Process	GO:0051093	negative regulation of developmental process	5.40726e-07	0.000543275	0	0	76	985
GO:0031325 positive regulation of cellular metabolic process	200	8.50805e-07	26.144	0.059	Biological Process	GO:0031325	positive regulation of cellular metabolic process	8.50805e-07	0.000683442	0	0	200	3401
GO:0045859 regulation of protein kinase activity	64	9.13666e-07	8.366	0.081	Biological Process	GO:0045859	regulation of protein kinase activity	9.13666e-07	0.000683442	0	0	64	791
GO:0031323 regulation of cellular metabolic process	337	1.05127e-06	44.052	0.053	Biological Process	GO:0031323	regulation of cellular metabolic process	1.05127e-06	0.000683442	0	0	337	6359
GO:0048518 positive regulation of biological process	337	1.06894e-06	44.052	0.053	Biological Process	GO:0048518	positive regulation of biological process	1.06894e-06	0.000683442	0	0	337	6360
GO:0050793 regulation of developmental process	163	1.34016e-06	21.307	0.061	Biological Process	GO:0050793	regulation of developmental process	1.34016e-06	0.000781677	0	0	163	2668
GO:0010647 positive regulation of cell communication	121	1.62869e-06	15.817	0.065	Biological Process	GO:0010647	positive regulation of cell communication	1.62869e-06	0.000781677	0	0	121	1849
GO:0007399 nervous system development	152	1.69575e-06	19.869	0.062	Biological Process	GO:0007399	nervous system development	1.69575e-06	0.000781677	0	0	152	2458
GO:0010604 positive regulation of macromolecule metabolic process	198	1.77227e-06	25.882	0.058	Biological Process	GO:0010604	positive regulation of macromolecule metabolic process	1.77227e-06	0.000781677	0	0	198	3395
GO:0023056 positive regulation of signaling	121	1.91602e-06	15.817	0.065	Biological Process	GO:0023056	positive regulation of signaling	1.91602e-06	0.000781677	0	0	121	1855
GO:0009893 positive regulation of metabolic process	213	1.95522e-06	27.843	0.057	Biological Process	GO:0009893	positive regulation of metabolic process	1.95522e-06	0.000781677	0	0	213	3712
GO:0045595 regulation of cell differentiation	123	2.27228e-06	16.078	0.065	Biological Process	GO:0045595	regulation of cell differentiation	2.27228e-06	0.000781677	0	0	123	1900
GO:0048731 system development	271	2.31614e-06	35.425	0.055	Biological Process	GO:0048731	system development	2.31614e-06	0.000781677	0	0	271	4956
GO:1901654 response to ketone	25	2.32333e-06	3.268	0.123	Biological Process	GO:1901654	response to ketone	2.32333e-06	0.000781677	0	0	25	203
GO:0032502 developmental process	338	2.33403e-06	44.183	0.053	Biological Process	GO:0032502	developmental process	2.33403e-06	0.000781677	0	0	338	6430
GO:0007275 multicellular organism development	297	2.46581e-06	38.824	0.054	Biological Process	GO:0007275	multicellular organism development	2.46581e-06	0.000788274	0	0	297	5526
GO:0045596 negative regulation of cell differentiation	59	3.31221e-06	7.712	0.08	Biological Process	GO:0045596	negative regulation of cell differentiation	3.31221e-06	0.000947431	0	0	59	736
GO:0051338 regulation of transferase activity	75	3.36059e-06	9.804	0.074	Biological Process	GO:0051338	regulation of transferase activity	3.36059e-06	0.000947431	0	0	75	1016
GO:0010646 regulation of cell communication	205	3.3904e-06	26.797	0.057	Biological Process	GO:0010646	regulation of cell communication	3.3904e-06	0.000947431	0	0	205	3573
GO:0120162 positive regulation of cold-induced thermogenesis	16	3.68714e-06	2.092	0.165	Biological Process	GO:0120162	positive regulation of cold-induced thermogenesis	3.68714e-06	0.000947431	0	0	16	97
GO:0106106 cold-induced thermogenesis	20	3.77194e-06	2.614	0.139	Biological Process	GO:0106106	cold-induced thermogenesis	3.77194e-06	0.000947431	0	0	20	144
GO:0120161 regulation of cold-induced thermogenesis	20	3.77194e-06	2.614	0.139	Biological Process	GO:0120161	regulation of cold-induced thermogenesis	3.77194e-06	0.000947431	0	0	20	144
GO:1990845 adaptive thermogenesis	21	4.00159e-06	2.745	0.134	Biological Process	GO:1990845	adaptive thermogenesis	4.00159e-06	0.000970456	0	0	21	157
GO:0048856 anatomical structure development	318	4.22707e-06	41.569	0.053	Biological Process	GO:0048856	anatomical structure development	4.22707e-06	0.000990966	0	0	318	6022
GO:0051171 regulation of nitrogen compound metabolic process	320	4.55014e-06	41.83	0.053	Biological Process	GO:0051171	regulation of nitrogen compound metabolic process	4.55014e-06	0.0010181	0	0	320	6071
GO:0031326 regulation of cellular biosynthetic process	237	4.63233e-06	30.98	0.056	Biological Process	GO:0031326	regulation of cellular biosynthetic process	4.63233e-06	0.0010181	0	0	237	4265
GO:0023051 regulation of signaling	206	5.38523e-06	26.928	0.057	Biological Process	GO:0023051	regulation of signaling	5.38523e-06	0.00114771	0	0	206	3618
GO:0006357 regulation of transcription by RNA polymerase II	159	6.06412e-06	20.784	0.06	Biological Process	GO:0006357	regulation of transcription by RNA polymerase II	6.06412e-06	0.00121658	0	0	159	2655
GO:0009889 regulation of biosynthetic process	239	6.07588e-06	31.242	0.055	Biological Process	GO:0009889	regulation of biosynthetic process	6.07588e-06	0.00121658	0	0	239	4323
GO:2000026 regulation of multicellular organismal development	132	6.22731e-06	17.255	0.062	Biological Process	GO:2000026	regulation of multicellular organismal development	6.22731e-06	0.00121658	0	0	132	2116
GO:0033993 response to lipid	70	7.45329e-06	9.15	0.074	Biological Process	GO:0033993	response to lipid	7.45329e-06	0.00141673	0	0	70	949
GO:0032268 regulation of cellular protein metabolic process	159	8.53498e-06	20.784	0.06	Biological Process	GO:0032268	regulation of cellular protein metabolic process	8.53498e-06	0.00157429	0	0	159	2671
GO:0043549 regulation of kinase activity	67	8.74036e-06	8.758	0.074	Biological Process	GO:0043549	regulation of kinase activity	8.74036e-06	0.00157429	0	0	67	900
GO:0080090 regulation of primary metabolic process	326	8.95374e-06	42.614	0.052	Biological Process	GO:0080090	regulation of primary metabolic process	8.95374e-06	0.00157429	0	0	326	6248
GO:0010556 regulation of macromolecule biosynthetic process	225	1.13141e-05	29.412	0.055	Biological Process	GO:0010556	regulation of macromolecule biosynthetic process	1.13141e-05	0.00191027	0	0	225	4060
GO:0048729 tissue morphogenesis	53	1.14079e-05	6.928	0.08	Biological Process	GO:0048729	tissue morphogenesis	1.14079e-05	0.00191027	0	0	53	663
GO:0048519 negative regulation of biological process	299	1.29302e-05	39.085	0.053	Biological Process	GO:0048519	negative regulation of biological process	1.29302e-05	0.00207696	0	0	299	5673
GO:2000112 regulation of cellular macromolecule biosynthetic process	223	1.31298e-05	29.15	0.055	Biological Process	GO:2000112	regulation of cellular macromolecule biosynthetic process	1.31298e-05	0.00207696	0	0	223	4026
GO:0030199 collagen fibril organization	16	1.34927e-05	2.092	0.15	Biological Process	GO:0030199	collagen fibril organization	1.34927e-05	0.00207696	0	0	16	107
GO:0031399 regulation of protein modification process	118	1.35845e-05	15.425	0.063	Biological Process	GO:0031399	regulation of protein modification process	1.35845e-05	0.00207696	0	0	118	1873
GO:0048468 cell development	134	1.4165e-05	17.516	0.061	Biological Process	GO:0048468	cell development	1.4165e-05	0.00211963	0	0	134	2191
GO:0060255 regulation of macromolecule metabolic process	330	1.57537e-05	43.137	0.052	Biological Process	GO:0060255	regulation of macromolecule metabolic process	1.57537e-05	0.00230824	0	0	330	6375
GO:0007267 cell-cell signaling	108	1.736e-05	14.118	0.064	Biological Process	GO:0007267	cell-cell signaling	1.736e-05	0.0024917	0	0	108	1688
GO:0006366 transcription by RNA polymerase II	164	1.82078e-05	21.438	0.058	Biological Process	GO:0006366	transcription by RNA polymerase II	1.82078e-05	0.00253225	0	0	164	2810
GO:0006915 apoptotic process	121	1.85818e-05	15.817	0.062	Biological Process	GO:0006915	apoptotic process	1.85818e-05	0.00253225	0	0	121	1945
GO:0051094 positive regulation of developmental process	93	1.87228e-05	12.157	0.066	Biological Process	GO:0051094	positive regulation of developmental process	1.87228e-05	0.00253225	0	0	93	1403
GO:0044772 mitotic cell cycle phase transition	46	2.02503e-05	6.013	0.082	Biological Process	GO:0044772	mitotic cell cycle phase transition	2.02503e-05	0.00268718	0	0	46	558
GO:0000278 mitotic cell cycle	75	2.27378e-05	9.804	0.07	Biological Process	GO:0000278	mitotic cell cycle	2.27378e-05	0.00296139	0	0	75	1073
GO:0009966 regulation of signal transduction	182	2.33319e-05	23.791	0.057	Biological Process	GO:0009966	regulation of signal transduction	2.33319e-05	0.00298351	0	0	182	3195
GO:0043170 macromolecule metabolic process	472	2.38693e-05	61.699	0.049	Biological Process	GO:0043170	macromolecule metabolic process	2.38693e-05	0.00299446	0	0	472	9672
GO:0043405 regulation of MAP kinase activity	32	2.42691e-05	4.183	0.095	Biological Process	GO:0043405	regulation of MAP kinase activity	2.42691e-05	0.00299446	0	0	32	336
GO:0045860 positive regulation of protein kinase activity	44	2.70297e-05	5.752	0.083	Biological Process	GO:0045860	positive regulation of protein kinase activity	2.70297e-05	0.0032446	0	0	44	531
GO:0051247 positive regulation of protein metabolic process	108	2.7219e-05	14.118	0.063	Biological Process	GO:0051247	positive regulation of protein metabolic process	2.7219e-05	0.0032446	0	0	108	1706
GO:0071902 positive regulation of protein serine/threonine kinase activity	32	2.89317e-05	4.183	0.094	Biological Process	GO:0071902	positive regulation of protein serine/threonine kinase activity	2.89317e-05	0.00337024	0	0	32	339
GO:0051246 regulation of protein metabolic process	167	2.92314e-05	21.83	0.058	Biological Process	GO:0051246	regulation of protein metabolic process	2.92314e-05	0.00337024	0	0	167	2896
GO:0009790 embryo development	73	3.09151e-05	9.542	0.07	Biological Process	GO:0009790	embryo development	3.09151e-05	0.00350223	0	0	73	1046
GO:0009967 positive regulation of signal transduction	106	3.15234e-05	13.856	0.063	Biological Process	GO:0009967	positive regulation of signal transduction	3.15234e-05	0.00350223	0	0	106	1673
GO:0010564 regulation of cell cycle process	58	3.18701e-05	7.582	0.075	Biological Process	GO:0010564	regulation of cell cycle process	3.18701e-05	0.00350223	0	0	58	776
GO:0035107 appendage morphogenesis	18	3.64805e-05	2.353	0.128	Biological Process	GO:0035107	appendage morphogenesis	3.64805e-05	0.00384184	0	0	18	141
GO:0035108 limb morphogenesis	18	3.64805e-05	2.353	0.128	Biological Process	GO:0035108	limb morphogenesis	3.64805e-05	0.00384184	0	0	18	141
GO:0090068 positive regulation of cell cycle process	29	3.66473e-05	3.791	0.098	Biological Process	GO:0090068	positive regulation of cell cycle process	3.66473e-05	0.00384184	0	0	29	297
GO:0051252 regulation of RNA metabolic process	212	3.71456e-05	27.712	0.055	Biological Process	GO:0051252	regulation of RNA metabolic process	3.71456e-05	0.00384184	0	0	212	3853
GO:0065009 regulation of molecular function	177	3.77352e-05	23.137	0.057	Biological Process	GO:0065009	regulation of molecular function	3.77352e-05	0.00384625	0	0	177	3117
GO:0031960 response to corticosteroid	20	3.83059e-05	2.614	0.119	Biological Process	GO:0031960	response to corticosteroid	3.83059e-05	0.00384865	0	0	20	168
GO:0042325 regulation of phosphorylation	103	3.97291e-05	13.464	0.063	Biological Process	GO:0042325	regulation of phosphorylation	3.97291e-05	0.00393541	0	0	103	1624
GO:1903047 mitotic cell cycle process	66	4.12913e-05	8.627	0.071	Biological Process	GO:1903047	mitotic cell cycle process	4.12913e-05	0.00403335	0	0	66	927
GO:0032270 positive regulation of cellular protein metabolic process	103	4.27736e-05	13.464	0.063	Biological Process	GO:0032270	positive regulation of cellular protein metabolic process	4.27736e-05	0.00405044	0	0	103	1627
GO:0120035 regulation of plasma membrane bounded cell projection organization	53	4.28663e-05	6.928	0.076	Biological Process	GO:0120035	regulation of plasma membrane bounded cell projection organization	4.28663e-05	0.00405044	0	0	53	696
GO:0003279 cardiac septum development	15	4.31939e-05	1.961	0.143	Biological Process	GO:0003279	cardiac septum development	4.31939e-05	0.00405044	0	0	15	105
GO:0001932 regulation of protein phosphorylation	94	4.40142e-05	12.288	0.065	Biological Process	GO:0001932	regulation of protein phosphorylation	4.40142e-05	0.00407305	0	0	94	1454
GO:0019219 regulation of nucleobase-containing compound metabolic process	227	4.62873e-05	29.673	0.054	Biological Process	GO:0019219	regulation of nucleobase-containing compound metabolic process	4.62873e-05	0.00419713	0	0	227	4187
GO:0080135 regulation of cellular response to stress	56	4.65485e-05	7.32	0.075	Biological Process	GO:0080135	regulation of cellular response to stress	4.65485e-05	0.00419713	0	0	56	751
GO:0050942 positive regulation of pigment cell differentiation	4	4.79792e-05	0.523	0.667	Biological Process	GO:0050942	positive regulation of pigment cell differentiation	4.79792e-05	0.00427136	0	0	4	6
GO:0009719 response to endogenous stimulus	106	4.87938e-05	13.856	0.063	Biological Process	GO:0009719	response to endogenous stimulus	4.87938e-05	0.00427176	0	0	106	1691
GO:0007346 regulation of mitotic cell cycle	49	4.91984e-05	6.405	0.078	Biological Process	GO:0007346	regulation of mitotic cell cycle	4.91984e-05	0.00427176	0	0	49	630
GO:1902531 regulation of intracellular signal transduction	118	5.03313e-05	15.425	0.061	Biological Process	GO:1902531	regulation of intracellular signal transduction	5.03313e-05	0.00431683	0	0	118	1929
GO:0051128 regulation of cellular component organization	154	5.46724e-05	20.131	0.058	Biological Process	GO:0051128	regulation of cellular component organization	5.46724e-05	0.00463266	0	0	154	2661
GO:0019222 regulation of metabolic process	352	5.59863e-05	46.013	0.051	Biological Process	GO:0019222	regulation of metabolic process	5.59863e-05	0.00468752	0	0	352	6960
GO:0031344 regulation of cell projection organization	53	6.01104e-05	6.928	0.075	Biological Process	GO:0031344	regulation of cell projection organization	6.01104e-05	0.00489248	0	0	53	705
GO:0010941 regulation of cell death	106	6.04032e-05	13.856	0.062	Biological Process	GO:0010941	regulation of cell death	6.04032e-05	0.00489248	0	0	106	1700
GO:0044260 cellular macromolecule metabolic process	420	6.11192e-05	54.902	0.049	Biological Process	GO:0044260	cellular macromolecule metabolic process	6.11192e-05	0.00489248	0	0	420	8525
GO:0097194 execution phase of apoptosis	14	6.12169e-05	1.83	0.146	Biological Process	GO:0097194	execution phase of apoptosis	6.12169e-05	0.00489248	0	0	14	96
GO:0001659 temperature homeostasis	20	6.32667e-05	2.614	0.115	Biological Process	GO:0001659	temperature homeostasis	6.32667e-05	0.00499949	0	0	20	174
GO:0051254 positive regulation of RNA metabolic process	107	6.53325e-05	13.987	0.062	Biological Process	GO:0051254	positive regulation of RNA metabolic process	6.53325e-05	0.00510537	0	0	107	1723
GO:0051239 regulation of multicellular organismal process	182	6.60883e-05	23.791	0.056	Biological Process	GO:0051239	regulation of multicellular organismal process	6.60883e-05	0.00510768	0	0	182	3253
GO:0043067 regulation of programmed cell death	99	6.78458e-05	12.941	0.063	Biological Process	GO:0043067	regulation of programmed cell death	6.78458e-05	0.0051746	0	0	99	1568
GO:0022603 regulation of anatomical structure morphogenesis	74	6.88002e-05	9.673	0.068	Biological Process	GO:0022603	regulation of anatomical structure morphogenesis	6.88002e-05	0.0051746	0	0	74	1091
GO:0033674 positive regulation of kinase activity	47	6.91614e-05	6.144	0.078	Biological Process	GO:0033674	positive regulation of kinase activity	6.91614e-05	0.0051746	0	0	47	604
GO:0001101 response to acid chemical	32	7.06018e-05	4.183	0.09	Biological Process	GO:0001101	response to acid chemical	7.06018e-05	0.00522676	0	0	32	355
GO:0044770 cell cycle phase transition	47	7.19722e-05	6.144	0.078	Biological Process	GO:0044770	cell cycle phase transition	7.19722e-05	0.00527271	0	0	47	605
GO:0031401 positive regulation of protein modification process	82	7.54573e-05	10.719	0.066	Biological Process	GO:0031401	positive regulation of protein modification process	7.54573e-05	0.0054224	0	0	82	1245
GO:0051384 response to glucocorticoid	18	7.60772e-05	2.353	0.121	Biological Process	GO:0051384	response to glucocorticoid	7.60772e-05	0.0054224	0	0	18	149
GO:0019220 regulation of phosphate metabolic process	112	7.70993e-05	14.641	0.061	Biological Process	GO:0019220	regulation of phosphate metabolic process	7.70993e-05	0.0054224	0	0	112	1829
GO:0051174 regulation of phosphorus metabolic process	112	7.70993e-05	14.641	0.061	Biological Process	GO:0051174	regulation of phosphorus metabolic process	7.70993e-05	0.0054224	0	0	112	1829
GO:0007417 central nervous system development	71	8.43557e-05	9.281	0.068	Biological Process	GO:0007417	central nervous system development	8.43557e-05	0.00584381	0	0	71	1042
GO:2001141 regulation of RNA biosynthetic process	197	8.5885e-05	25.752	0.055	Biological Process	GO:2001141	regulation of RNA biosynthetic process	8.5885e-05	0.00584381	0	0	197	3585
GO:0003205 cardiac chamber development	19	8.60355e-05	2.484	0.116	Biological Process	GO:0003205	cardiac chamber development	8.60355e-05	0.00584381	0	0	19	164
GO:0040008 regulation of growth	50	8.6415e-05	6.536	0.076	Biological Process	GO:0040008	regulation of growth	8.6415e-05	0.00584381	0	0	50	662
GO:1902533 positive regulation of intracellular signal transduction	75	8.97931e-05	9.804	0.067	Biological Process	GO:1902533	positive regulation of intracellular signal transduction	8.97931e-05	0.00597341	0	0	75	1119
GO:0042981 regulation of apoptotic process	97	9.06391e-05	12.68	0.063	Biological Process	GO:0042981	regulation of apoptotic process	9.06391e-05	0.00597341	0	0	97	1541
GO:0045787 positive regulation of cell cycle	34	9.08794e-05	4.444	0.087	Biological Process	GO:0045787	positive regulation of cell cycle	9.08794e-05	0.00597341	0	0	34	392
GO:0048869 cellular developmental process	239	9.30062e-05	31.242	0.053	Biological Process	GO:0048869	cellular developmental process	9.30062e-05	0.0060088	0	0	239	4491
GO:0051301 cell division	48	9.32348e-05	6.275	0.076	Biological Process	GO:0051301	cell division	9.32348e-05	0.0060088	0	0	48	629
GO:0045665 negative regulation of neuron differentiation	23	9.3981e-05	3.007	0.104	Biological Process	GO:0045665	negative regulation of neuron differentiation	9.3981e-05	0.0060088	0	0	23	222
GO:0048598 embryonic morphogenesis	46	9.60769e-05	6.013	0.077	Biological Process	GO:0048598	embryonic morphogenesis	9.60769e-05	0.00608153	0	0	46	595
GO:0035295 tube development	71	9.76762e-05	9.281	0.068	Biological Process	GO:0035295	tube development	9.76762e-05	0.00608153	0	0	71	1047
GO:0035556 intracellular signal transduction	165	9.77126e-05	21.569	0.057	Biological Process	GO:0035556	intracellular signal transduction	9.77126e-05	0.00608153	0	0	165	2920
GO:0035239 tube morphogenesis	60	9.99907e-05	7.843	0.071	Biological Process	GO:0035239	tube morphogenesis	9.99907e-05	0.00616872	0	0	60	845
GO:0051347 positive regulation of transferase activity	51	0.00010158	6.667	0.075	Biological Process	GO:0051347	positive regulation of transferase activity	0.00010158	0.0062028	0	0	51	684
GO:0061448 connective tissue development	25	0.000102307	3.268	0.099	Biological Process	GO:0061448	connective tissue development	0.000102307	0.0062028	0	0	25	253
GO:0030182 neuron differentiation	90	0.000107439	11.765	0.064	Biological Process	GO:0030182	neuron differentiation	0.000107439	0.00644416	0	0	90	1412
GO:0050932 regulation of pigment cell differentiation	4	0.00010812	0.523	0.571	Biological Process	GO:0050932	regulation of pigment cell differentiation	0.00010812	0.00644416	0	0	4	7
GO:0042327 positive regulation of phosphorylation	73	0.000114494	9.542	0.067	Biological Process	GO:0042327	positive regulation of phosphorylation	0.000114494	0.00676671	0	0	73	1090
GO:0045893 positive regulation of transcription, DNA-templated	101	0.000116555	13.203	0.062	Biological Process	GO:0045893	positive regulation of transcription, DNA-templated	0.000116555	0.00677462	0	0	101	1630
GO:1903508 positive regulation of nucleic acid-templated transcription	101	0.000116555	13.203	0.062	Biological Process	GO:1903508	positive regulation of nucleic acid-templated transcription	0.000116555	0.00677462	0	0	101	1630
GO:1902680 positive regulation of RNA biosynthetic process	101	0.000119269	13.203	0.062	Biological Process	GO:1902680	positive regulation of RNA biosynthetic process	0.000119269	0.00687558	0	0	101	1631
GO:0070848 response to growth factor	53	0.000123281	6.928	0.073	Biological Process	GO:0070848	response to growth factor	0.000123281	0.00700955	0	0	53	725
GO:0008219 cell death	131	0.000123587	17.124	0.059	Biological Process	GO:0008219	cell death	0.000123587	0.00700955	0	0	131	2233
GO:0006464 cellular protein modification process	230	0.000130764	30.065	0.053	Biological Process	GO:0006464	cellular protein modification process	0.000130764	0.00727076	0	0	230	4319
GO:0036211 protein modification process	230	0.000130764	30.065	0.053	Biological Process	GO:0036211	protein modification process	0.000130764	0.00727076	0	0	230	4319
GO:0043406 positive regulation of MAP kinase activity	25	0.000131293	3.268	0.097	Biological Process	GO:0043406	positive regulation of MAP kinase activity	0.000131293	0.00727076	0	0	25	257
GO:0022008 neurogenesis	103	0.000132389	13.464	0.061	Biological Process	GO:0022008	neurogenesis	0.000132389	0.00727416	0	0	103	1675
GO:0000165 MAPK cascade	65	0.000137583	8.497	0.069	Biological Process	GO:0000165	MAPK cascade	0.000137583	0.00743849	0	0	65	947
GO:0023014 signal transduction by protein phosphorylation	65	0.000137583	8.497	0.069	Biological Process	GO:0023014	signal transduction by protein phosphorylation	0.000137583	0.00743849	0	0	65	947
GO:0006355 regulation of transcription, DNA-templated	195	0.00014053	25.49	0.055	Biological Process	GO:0006355	regulation of transcription, DNA-templated	0.00014053	0.00743849	0	0	195	3573
GO:0048762 mesenchymal cell differentiation	23	0.000140545	3.007	0.101	Biological Process	GO:0048762	mesenchymal cell differentiation	0.000140545	0.00743849	0	0	23	228
GO:0033554 cellular response to stress	125	0.000141084	16.34	0.059	Biological Process	GO:0033554	cellular response to stress	0.000141084	0.00743849	0	0	125	2118
GO:0002087 regulation of respiratory gaseous exchange by neurological system process	5	0.000141726	0.654	0.385	Biological Process	GO:0002087	regulation of respiratory gaseous exchange by neurological system process	0.000141726	0.00743849	0	0	5	13
GO:0060411 cardiac septum morphogenesis	11	0.000144445	1.438	0.162	Biological Process	GO:0060411	cardiac septum morphogenesis	0.000144445	0.00749967	0	0	11	68
GO:1903506 regulation of nucleic acid-templated transcription	195	0.000145071	25.49	0.055	Biological Process	GO:1903506	regulation of nucleic acid-templated transcription	0.000145071	0.00749967	0	0	195	3575
GO:1902229 regulation of intrinsic apoptotic signaling pathway in response to DNA damage	8	0.000146091	1.046	0.216	Biological Process	GO:1902229	regulation of intrinsic apoptotic signaling pathway in response to DNA damage	0.000146091	0.00749967	0	0	8	37
GO:0043254 regulation of protein complex assembly	42	0.000149227	5.49	0.078	Biological Process	GO:0043254	regulation of protein complex assembly	0.000149227	0.00757279	0	0	42	537
GO:0045931 positive regulation of mitotic cell cycle	18	0.000149668	2.353	0.115	Biological Process	GO:0045931	positive regulation of mitotic cell cycle	0.000149668	0.00757279	0	0	18	157
GO:0010562 positive regulation of phosphorus metabolic process	76	0.000169293	9.935	0.065	Biological Process	GO:0010562	positive regulation of phosphorus metabolic process	0.000169293	0.00836907	0	0	76	1161
GO:0045937 positive regulation of phosphate metabolic process	76	0.000169293	9.935	0.065	Biological Process	GO:0045937	positive regulation of phosphate metabolic process	0.000169293	0.00836907	0	0	76	1161
GO:0010810 regulation of cell-substrate adhesion	22	0.000169538	2.876	0.102	Biological Process	GO:0010810	regulation of cell-substrate adhesion	0.000169538	0.00836907	0	0	22	216
GO:0070997 neuron death	31	0.000170599	4.052	0.087	Biological Process	GO:0070997	neuron death	0.000170599	0.00836907	0	0	31	356
GO:0050794 regulation of cellular process	525	0.000171356	68.627	0.047	Biological Process	GO:0050794	regulation of cellular process	0.000171356	0.00836907	0	0	525	11089
GO:0050790 regulation of catalytic activity	141	0.000172948	18.431	0.057	Biological Process	GO:0050790	regulation of catalytic activity	0.000172948	0.00838858	0	0	141	2455
GO:0035136 forelimb morphogenesis	8	0.000178127	1.046	0.211	Biological Process	GO:0035136	forelimb morphogenesis	0.000178127	0.00855736	0	0	8	38
GO:0048699 generation of neurons	97	0.000178861	12.68	0.062	Biological Process	GO:0048699	generation of neurons	0.000178861	0.00855736	0	0	97	1570
GO:0030326 embryonic limb morphogenesis	15	0.000183825	1.961	0.126	Biological Process	GO:0030326	embryonic limb morphogenesis	0.000183825	0.00865645	0	0	15	119
GO:0035113 embryonic appendage morphogenesis	15	0.000183825	1.961	0.126	Biological Process	GO:0035113	embryonic appendage morphogenesis	0.000183825	0.00865645	0	0	15	119
GO:0031175 neuron projection development	68	0.000184625	8.889	0.067	Biological Process	GO:0031175	neuron projection development	0.000184625	0.00865645	0	0	68	1013
GO:0010468 regulation of gene expression	248	0.000189438	32.418	0.052	Biological Process	GO:0010468	regulation of gene expression	0.000189438	0.00879654	0	0	248	4736
GO:0045664 regulation of neuron differentiation	49	0.000190114	6.405	0.074	Biological Process	GO:0045664	regulation of neuron differentiation	0.000190114	0.00879654	0	0	49	666
GO:0006468 protein phosphorylation	119	0.000191743	15.556	0.059	Biological Process	GO:0006468	protein phosphorylation	0.000191743	0.00881389	0	0	119	2012
GO:0001934 positive regulation of protein phosphorylation	68	0.000195384	8.889	0.067	Biological Process	GO:0001934	positive regulation of protein phosphorylation	0.000195384	0.00892296	0	0	68	1015
GO:0048736 appendage development	19	0.000203626	2.484	0.109	Biological Process	GO:0048736	appendage development	0.000203626	0.00918015	0	0	19	175
GO:0060173 limb development	19	0.000203626	2.484	0.109	Biological Process	GO:0060173	limb development	0.000203626	0.00918015	0	0	19	175
GO:0048087 positive regulation of developmental pigmentation	4	0.000208852	0.523	0.5	Biological Process	GO:0048087	positive regulation of developmental pigmentation	0.000208852	0.00935575	0	0	4	8
GO:0014854 response to inactivity	5	0.000212656	0.654	0.357	Biological Process	GO:0014854	response to inactivity	0.000212656	0.00946589	0	0	5	14
GO:0048666 neuron development	75	0.000215109	9.804	0.065	Biological Process	GO:0048666	neuron development	0.000215109	0.00951485	0	0	75	1151
GO:0031328 positive regulation of cellular biosynthetic process	117	0.000226884	15.294	0.059	Biological Process	GO:0031328	positive regulation of cellular biosynthetic process	0.000226884	0.00996286	0	0	117	1980
GO:0032774 RNA biosynthetic process	203	0.000228071	26.536	0.054	Biological Process	GO:0032774	RNA biosynthetic process	0.000228071	0.00996286	0	0	203	3775
GO:0051129 negative regulation of cellular component organization	55	0.000231626	7.19	0.071	Biological Process	GO:0051129	negative regulation of cellular component organization	0.000231626	0.0100557	0	0	55	780
GO:0030030 cell projection organization	99	0.000242039	12.941	0.061	Biological Process	GO:0030030	cell projection organization	0.000242039	0.0104433	0	0	99	1623
GO:0120036 plasma membrane bounded cell projection organization	97	0.000245106	12.68	0.061	Biological Process	GO:0120036	plasma membrane bounded cell projection organization	0.000245106	0.0105111	0	0	97	1584
GO:0007050 cell cycle arrest	23	0.000248809	3.007	0.097	Biological Process	GO:0007050	cell cycle arrest	0.000248809	0.0106025	0	0	23	237
GO:0010557 positive regulation of macromolecule biosynthetic process	111	0.000250251	14.51	0.06	Biological Process	GO:0010557	positive regulation of macromolecule biosynthetic process	0.000250251	0.0106025	0	0	111	1864
GO:0051216 cartilage development	20	0.000262374	2.614	0.104	Biological Process	GO:0051216	cartilage development	0.000262374	0.0110496	0	0	20	193
GO:0051726 regulation of cell cycle	77	0.000283408	10.065	0.064	Biological Process	GO:0051726	regulation of cell cycle	0.000283408	0.0118643	0	0	77	1200
GO:0051098 regulation of binding	31	0.000291665	4.052	0.084	Biological Process	GO:0051098	regulation of binding	0.000291665	0.0121378	0	0	31	367
GO:0030154 cell differentiation	227	0.000298	29.673	0.053	Biological Process	GO:0030154	cell differentiation	0.000298	0.0123284	0	0	227	4311
GO:0006351 transcription, DNA-templated	201	0.000306871	26.275	0.054	Biological Process	GO:0006351	transcription, DNA-templated	0.000306871	0.0126212	0	0	201	3752
GO:0043066 negative regulation of apoptotic process	60	0.000313936	7.843	0.068	Biological Process	GO:0043066	negative regulation of apoptotic process	0.000313936	0.0128367	0	0	60	882
GO:0097659 nucleic acid-templated transcription	201	0.000316078	26.275	0.054	Biological Process	GO:0097659	nucleic acid-templated transcription	0.000316078	0.0128496	0	0	201	3754
GO:0009887 animal organ morphogenesis	70	0.00032151	9.15	0.065	Biological Process	GO:0009887	animal organ morphogenesis	0.00032151	0.0129953	0	0	70	1071
GO:0022402 cell cycle process	90	0.000327962	11.765	0.062	Biological Process	GO:0022402	cell cycle process	0.000327962	0.013123	0	0	90	1459
GO:0060548 negative regulation of cell death	66	0.000328402	8.627	0.066	Biological Process	GO:0060548	negative regulation of cell death	0.000328402	0.013123	0	0	66	996
GO:0001558 regulation of cell growth	34	0.000334363	4.444	0.081	Biological Process	GO:0001558	regulation of cell growth	0.000334363	0.0132857	0	0	34	420
GO:0097193 intrinsic apoptotic signaling pathway	26	0.00035609	3.399	0.09	Biological Process	GO:0097193	intrinsic apoptotic signaling pathway	0.00035609	0.0140185	0	0	26	290
GO:0051402 neuron apoptotic process	23	0.000356791	3.007	0.095	Biological Process	GO:0051402	neuron apoptotic process	0.000356791	0.0140185	0	0	23	243
GO:0070782 phosphatidylserine exposure on apoptotic cell surface	4	0.000363106	0.523	0.444	Biological Process	GO:0070782	phosphatidylserine exposure on apoptotic cell surface	0.000363106	0.0141873	0	0	4	9
GO:0043069 negative regulation of programmed cell death	61	0.000366604	7.974	0.067	Biological Process	GO:0043069	negative regulation of programmed cell death	0.000366604	0.0142449	0	0	61	906
GO:0009059 macromolecule biosynthetic process	261	0.00037134	34.118	0.051	Biological Process	GO:0009059	macromolecule biosynthetic process	0.00037134	0.0142848	0	0	261	5071
GO:0034645 cellular macromolecule biosynthetic process	258	0.000371692	33.725	0.052	Biological Process	GO:0034645	cellular macromolecule biosynthetic process	0.000371692	0.0142848	0	0	258	5005
GO:0044087 regulation of cellular component biogenesis	68	0.000387352	8.889	0.065	Biological Process	GO:0044087	regulation of cellular component biogenesis	0.000387352	0.0147485	0	0	68	1040
GO:0019438 aromatic compound biosynthetic process	231	0.000387952	30.196	0.052	Biological Process	GO:0019438	aromatic compound biosynthetic process	0.000387952	0.0147485	0	0	231	4417
GO:0012501 programmed cell death	121	0.000396774	15.817	0.058	Biological Process	GO:0012501	programmed cell death	0.000396774	0.0150027	0	0	121	2090
GO:0009891 positive regulation of biosynthetic process	117	0.000400231	15.294	0.058	Biological Process	GO:0009891	positive regulation of biosynthetic process	0.000400231	0.0150525	0	0	117	2009
GO:0065008 regulation of biological quality	219	0.00040827	28.627	0.053	Biological Process	GO:0065008	regulation of biological quality	0.00040827	0.0151792	0	0	219	4160
GO:0045935 positive regulation of nucleobase-containing compound metabolic process	113	0.000409343	14.771	0.059	Biological Process	GO:0045935	positive regulation of nucleobase-containing compound metabolic process	0.000409343	0.0151792	0	0	113	1929
GO:0034654 nucleobase-containing compound biosynthetic process	227	0.000410075	29.673	0.052	Biological Process	GO:0034654	nucleobase-containing compound biosynthetic process	0.000410075	0.0151792	0	0	227	4334
GO:0051961 negative regulation of nervous system development	27	0.000415437	3.529	0.087	Biological Process	GO:0051961	negative regulation of nervous system development	0.000415437	0.0151842	0	0	27	309
GO:0040007 growth	63	0.000415704	8.235	0.066	Biological Process	GO:0040007	growth	0.000415704	0.0151842	0	0	63	948
GO:0060284 regulation of cell development	64	0.00041738	8.366	0.066	Biological Process	GO:0060284	regulation of cell development	0.00041738	0.0151842	0	0	64	967
GO:0031099 regeneration	20	0.000418844	2.614	0.1	Biological Process	GO:0031099	regeneration	0.000418844	0.0151842	0	0	20	200
GO:0050789 regulation of biological process	552	0.00042548	72.157	0.047	Biological Process	GO:0050789	regulation of biological process	0.00042548	0.0153457	0	0	552	11817
GO:0044065 regulation of respiratory system process	5	0.000431753	0.654	0.312	Biological Process	GO:0044065	regulation of respiratory system process	0.000431753	0.0154138	0	0	5	16
GO:0090343 positive regulation of cell aging	5	0.000431753	0.654	0.312	Biological Process	GO:0090343	positive regulation of cell aging	0.000431753	0.0154138	0	0	5	16
GO:0030902 hindbrain development	17	0.00044581	2.222	0.108	Biological Process	GO:0030902	hindbrain development	0.00044581	0.0158353	0	0	17	157
GO:0045597 positive regulation of cell differentiation	66	0.000454238	8.627	0.065	Biological Process	GO:0045597	positive regulation of cell differentiation	0.000454238	0.0160535	0	0	66	1008
GO:0000082 G1/S transition of mitotic cell cycle	22	0.000462987	2.876	0.095	Biological Process	GO:0000082	G1/S transition of mitotic cell cycle	0.000462987	0.0162809	0	0	22	232
GO:0071310 cellular response to organic substance	150	0.000470878	19.608	0.056	Biological Process	GO:0071310	cellular response to organic substance	0.000470878	0.016476	0	0	150	2699
GO:1901362 organic cyclic compound biosynthetic process	237	0.000488285	30.98	0.052	Biological Process	GO:1901362	organic cyclic compound biosynthetic process	0.000488285	0.0169073	0	0	237	4565
GO:0010948 negative regulation of cell cycle process	29	0.000489131	3.791	0.084	Biological Process	GO:0010948	negative regulation of cell cycle process	0.000489131	0.0169073	0	0	29	345
GO:0042493 response to drug	68	0.000490415	8.889	0.065	Biological Process	GO:0042493	response to drug	0.000490415	0.0169073	0	0	68	1049
GO:0048513 animal organ development	195	0.000495013	25.49	0.053	Biological Process	GO:0048513	animal organ development	0.000495013	0.0169826	0	0	195	3656
GO:0071704 organic substance metabolic process	530	0.000520947	69.281	0.047	Biological Process	GO:0071704	organic substance metabolic process	0.000520947	0.0177855	0	0	530	11302
GO:0045944 positive regulation of transcription by RNA polymerase II	76	0.000528464	9.935	0.063	Biological Process	GO:0045944	positive regulation of transcription by RNA polymerase II	0.000528464	0.017955	0	0	76	1206
GO:0010628 positive regulation of gene expression	122	0.000548504	15.948	0.057	Biological Process	GO:0010628	positive regulation of gene expression	0.000548504	0.0185463	0	0	122	2128
GO:0009888 tissue development	119	0.000573363	15.556	0.058	Biological Process	GO:0009888	tissue development	0.000573363	0.0192941	0	0	119	2069
GO:0043009 chordate embryonic development	45	0.000584146	5.882	0.072	Biological Process	GO:0043009	chordate embryonic development	0.000584146	0.019505	0	0	45	627
GO:0010558 negative regulation of macromolecule biosynthetic process	93	0.000586476	12.157	0.06	Biological Process	GO:0010558	negative regulation of macromolecule biosynthetic process	0.000586476	0.019505	0	0	93	1545
GO:1901214 regulation of neuron death	27	0.00058795	3.529	0.085	Biological Process	GO:1901214	regulation of neuron death	0.00058795	0.019505	0	0	27	316
GO:1902107 positive regulation of leukocyte differentiation	17	0.000596437	2.222	0.106	Biological Process	GO:1902107	positive regulation of leukocyte differentiation	0.000596437	0.0196936	0	0	17	161
GO:0048583 regulation of response to stimulus	230	0.000602819	30.065	0.052	Biological Process	GO:0048583	regulation of response to stimulus	0.000602819	0.0197568	0	0	230	4428
GO:1905114 cell surface receptor signaling pathway involved in cell-cell signaling	45	0.00060397	5.882	0.072	Biological Process	GO:1905114	cell surface receptor signaling pathway involved in cell-cell signaling	0.00060397	0.0197568	0	0	45	628
GO:0018130 heterocycle biosynthetic process	229	0.000609419	29.935	0.052	Biological Process	GO:0018130	heterocycle biosynthetic process	0.000609419	0.0198428	0	0	229	4407
GO:0009792 embryo development ending in birth or egg hatching	46	0.000622599	6.013	0.071	Biological Process	GO:0009792	embryo development ending in birth or egg hatching	0.000622599	0.0201785	0	0	46	647
GO:0097305 response to alcohol	23	0.00062917	3.007	0.091	Biological Process	GO:0097305	response to alcohol	0.00062917	0.0202979	0	0	23	253
GO:0060485 mesenchyme development	25	0.000632389	3.268	0.088	Biological Process	GO:0060485	mesenchyme development	0.000632389	0.0203086	0	0	25	285
GO:0071495 cellular response to endogenous stimulus	86	0.00063701	11.242	0.061	Biological Process	GO:0071495	cellular response to endogenous stimulus	0.00063701	0.0203641	0	0	86	1410
GO:0007049 cell cycle	111	0.000642947	14.51	0.058	Biological Process	GO:0007049	cell cycle	0.000642947	0.0204608	0	0	111	1912
GO:0043410 positive regulation of MAPK cascade	40	0.000656944	5.229	0.074	Biological Process	GO:0043410	positive regulation of MAPK cascade	0.000656944	0.0208121	0	0	40	541
GO:1900739 regulation of protein insertion into mitochondrial membrane involved in apoptotic signaling pathway	6	0.000691308	0.784	0.231	Biological Process	GO:1900739	regulation of protein insertion into mitochondrial membrane involved in apoptotic signaling pathway	0.000691308	0.0217052	0	0	6	26
GO:1900740 positive regulation of protein insertion into mitochondrial membrane involved in apoptotic signaling pathway	6	0.000691308	0.784	0.231	Biological Process	GO:1900740	positive regulation of protein insertion into mitochondrial membrane involved in apoptotic signaling pathway	0.000691308	0.0217052	0	0	6	26
GO:0050768 negative regulation of neurogenesis	25	0.00070004	3.268	0.087	Biological Process	GO:0050768	negative regulation of neurogenesis	0.00070004	0.0217265	0	0	25	287
GO:0031324 negative regulation of cellular metabolic process	148	0.000705173	19.346	0.055	Biological Process	GO:0031324	negative regulation of cellular metabolic process	0.000705173	0.0217265	0	0	148	2682
GO:2000113 negative regulation of cellular macromolecule biosynthetic process	92	0.000706887	12.026	0.06	Biological Process	GO:2000113	negative regulation of cellular macromolecule biosynthetic process	0.000706887	0.0217265	0	0	92	1534
GO:0006807 nitrogen compound metabolic process	493	0.000707897	64.444	0.047	Biological Process	GO:0006807	nitrogen compound metabolic process	0.000707897	0.0217265	0	0	493	10444
GO:0048646 anatomical structure formation involved in morphogenesis	70	0.000708687	9.15	0.064	Biological Process	GO:0048646	anatomical structure formation involved in morphogenesis	0.000708687	0.0217265	0	0	70	1102
GO:0002009 morphogenesis of an epithelium	41	0.000710522	5.359	0.073	Biological Process	GO:0002009	morphogenesis of an epithelium	0.000710522	0.0217265	0	0	41	561
GO:0001501 skeletal system development	38	0.000715088	4.967	0.075	Biological Process	GO:0001501	skeletal system development	0.000715088	0.0217715	0	0	38	508
GO:0051241 negative regulation of multicellular organismal process	77	0.000726519	10.065	0.062	Biological Process	GO:0051241	negative regulation of multicellular organismal process	0.000726519	0.0220242	0	0	77	1239
GO:0031327 negative regulation of cellular biosynthetic process	96	0.000736478	12.549	0.059	Biological Process	GO:0031327	negative regulation of cellular biosynthetic process	0.000736478	0.0222303	0	0	96	1616
GO:2001021 negative regulation of response to DNA damage stimulus	11	0.000764062	1.438	0.134	Biological Process	GO:2001021	negative regulation of response to DNA damage stimulus	0.000764062	0.0229643	0	0	11	82
GO:0043408 regulation of MAPK cascade	50	0.000771896	6.536	0.069	Biological Process	GO:0043408	regulation of MAPK cascade	0.000771896	0.0230668	0	0	50	727
GO:1901990 regulation of mitotic cell cycle phase transition	33	0.000774031	4.314	0.078	Biological Process	GO:1901990	regulation of mitotic cell cycle phase transition	0.000774031	0.0230668	0	0	33	423
GO:0048638 regulation of developmental growth	27	0.000782865	3.529	0.084	Biological Process	GO:0048638	regulation of developmental growth	0.000782865	0.0231945	0	0	27	322
GO:0072359 circulatory system development	69	0.000787418	9.02	0.063	Biological Process	GO:0072359	circulatory system development	0.000787418	0.0231945	0	0	69	1087
GO:0043455 regulation of secondary metabolic process	5	0.000788209	0.654	0.278	Biological Process	GO:0043455	regulation of secondary metabolic process	0.000788209	0.0231945	0	0	5	18
GO:0045927 positive regulation of growth	23	0.00082323	3.007	0.089	Biological Process	GO:0045927	positive regulation of growth	0.00082323	0.0241241	0	0	23	258
GO:0043523 regulation of neuron apoptotic process	20	0.000828062	2.614	0.095	Biological Process	GO:0043523	regulation of neuron apoptotic process	0.000828062	0.024165	0	0	20	211
GO:0044249 cellular biosynthetic process	307	0.000844646	40.131	0.05	Biological Process	GO:0044249	cellular biosynthetic process	0.000844646	0.024307	0	0	307	6162
GO:0001952 regulation of cell-matrix adhesion	14	0.000846754	1.83	0.114	Biological Process	GO:0001952	regulation of cell-matrix adhesion	0.000846754	0.024307	0	0	14	123
GO:0003231 cardiac ventricle development	14	0.000846754	1.83	0.114	Biological Process	GO:0003231	cardiac ventricle development	0.000846754	0.024307	0	0	14	123
GO:0048706 embryonic skeletal system development	14	0.000846754	1.83	0.114	Biological Process	GO:0048706	embryonic skeletal system development	0.000846754	0.024307	0	0	14	123
GO:0009890 negative regulation of biosynthetic process	97	0.000879821	12.68	0.059	Biological Process	GO:0009890	negative regulation of biosynthetic process	0.000879821	0.0249627	0	0	97	1645
GO:0016310 phosphorylation	137	0.000884117	17.908	0.056	Biological Process	GO:0016310	phosphorylation	0.000884117	0.0249627	0	0	137	2466
GO:0014870 response to muscle inactivity	4	0.000887342	0.523	0.364	Biological Process	GO:0014870	response to muscle inactivity	0.000887342	0.0249627	0	0	4	11
GO:0014877 response to muscle inactivity involved in regulation of muscle adaptation	4	0.000887342	0.523	0.364	Biological Process	GO:0014877	response to muscle inactivity involved in regulation of muscle adaptation	0.000887342	0.0249627	0	0	4	11
GO:0014894 response to denervation involved in regulation of muscle adaptation	4	0.000887342	0.523	0.364	Biological Process	GO:0014894	response to denervation involved in regulation of muscle adaptation	0.000887342	0.0249627	0	0	4	11
GO:0030330 DNA damage response, signal transduction by p53 class mediator	13	0.000901004	1.699	0.118	Biological Process	GO:0030330	DNA damage response, signal transduction by p53 class mediator	0.000901004	0.0251983	0	0	13	110
GO:0070887 cellular response to chemical stimulus	176	0.000902883	23.007	0.053	Biological Process	GO:0070887	cellular response to chemical stimulus	0.000902883	0.0251983	0	0	176	3291
GO:0045165 cell fate commitment	23	0.000914281	3.007	0.088	Biological Process	GO:0045165	cell fate commitment	0.000914281	0.0254156	0	0	23	260
GO:0010467 gene expression	286	0.000942571	37.386	0.05	Biological Process	GO:0010467	gene expression	0.000942571	0.0260353	0	0	286	5701
GO:0044267 cellular protein metabolic process	271	0.00094398	35.425	0.05	Biological Process	GO:0044267	cellular protein metabolic process	0.00094398	0.0260353	0	0	271	5367
GO:0043412 macromolecule modification	234	0.000952908	30.588	0.051	Biological Process	GO:0043412	macromolecule modification	0.000952908	0.0261789	0	0	234	4551
GO:0071156 regulation of cell cycle arrest	13	0.000981189	1.699	0.117	Biological Process	GO:0071156	regulation of cell cycle arrest	0.000981189	0.026851	0	0	13	111
GO:0010975 regulation of neuron projection development	38	0.000989574	4.967	0.074	Biological Process	GO:0010975	regulation of neuron projection development	0.000989574	0.0269755	0	0	38	517
GO:0045930 negative regulation of mitotic cell cycle	26	0.00101413	3.399	0.084	Biological Process	GO:0045930	negative regulation of mitotic cell cycle	0.00101413	0.0275381	0	0	26	311
GO:0051172 negative regulation of nitrogen compound metabolic process	139	0.00102598	18.17	0.055	Biological Process	GO:0051172	negative regulation of nitrogen compound metabolic process	0.00102598	0.0277528	0	0	139	2517
GO:0010721 negative regulation of cell development	27	0.00107956	3.529	0.082	Biological Process	GO:0010721	negative regulation of cell development	0.00107956	0.0290901	0	0	27	329
GO:0045786 negative regulation of cell cycle	43	0.00109651	5.621	0.07	Biological Process	GO:0045786	negative regulation of cell cycle	0.00109651	0.0294341	0	0	43	610
GO:0050767 regulation of neurogenesis	55	0.00114051	7.19	0.066	Biological Process	GO:0050767	regulation of neurogenesis	0.00114051	0.030211	0	0	55	834
GO:0031098 stress-activated protein kinase signaling cascade	25	0.00114146	3.268	0.084	Biological Process	GO:0031098	stress-activated protein kinase signaling cascade	0.00114146	0.030211	0	0	25	297
GO:0098656 anion transmembrane transport	25	0.00114146	3.268	0.084	Biological Process	GO:0098656	anion transmembrane transport	0.00114146	0.030211	0	0	25	297
GO:0014031 mesenchymal cell development	11	0.00114263	1.438	0.128	Biological Process	GO:0014031	mesenchymal cell development	0.00114263	0.030211	0	0	11	86
GO:0016049 cell growth	36	0.0011612	4.706	0.074	Biological Process	GO:0016049	cell growth	0.0011612	0.0304749	0	0	36	486
GO:0030198 extracellular matrix organization	32	0.00116465	4.183	0.077	Biological Process	GO:0030198	extracellular matrix organization	0.00116465	0.0304749	0	0	32	416
GO:0010033 response to organic substance	176	0.00116561	23.007	0.053	Biological Process	GO:0010033	response to organic substance	0.00116561	0.0304749	0	0	176	3309
GO:0001568 blood vessel development	47	0.00119007	6.144	0.069	Biological Process	GO:0001568	blood vessel development	0.00119007	0.0309991	0	0	47	686
GO:0016055 Wnt signaling pathway	38	0.0012205	4.967	0.073	Biological Process	GO:0016055	Wnt signaling pathway	0.0012205	0.0316129	0	0	38	523
GO:0051403 stress-activated MAPK cascade	24	0.00122262	3.137	0.085	Biological Process	GO:0051403	stress-activated MAPK cascade	0.00122262	0.0316129	0	0	24	282
GO:0032147 activation of protein kinase activity	27	0.00123396	3.529	0.081	Biological Process	GO:0032147	activation of protein kinase activity	0.00123396	0.0317893	0	0	27	332
GO:0048863 stem cell differentiation	23	0.00124158	3.007	0.086	Biological Process	GO:0048863	stem cell differentiation	0.00124158	0.0318688	0	0	23	266
GO:0001656 metanephros development	11	0.00125818	1.438	0.126	Biological Process	GO:0001656	metanephros development	0.00125818	0.0320662	0	0	11	87
GO:0022037 metencephalon development	13	0.00125839	1.699	0.114	Biological Process	GO:0022037	metencephalon development	0.00125839	0.0320662	0	0	13	114
GO:0030155 regulation of cell adhesion	49	0.00129535	6.405	0.067	Biological Process	GO:0030155	regulation of cell adhesion	0.00129535	0.032809	0	0	49	726
GO:0008284 positive regulation of cell proliferation	60	0.00129687	7.843	0.064	Biological Process	GO:0008284	positive regulation of cell proliferation	0.00129687	0.032809	0	0	60	934
GO:0198738 cell-cell signaling by wnt	38	0.00130734	4.967	0.072	Biological Process	GO:0198738	cell-cell signaling by wnt	0.00130734	0.0329552	0	0	38	525
GO:0034629 cellular protein-containing complex localization	5	0.00132766	0.654	0.25	Biological Process	GO:0034629	cellular protein-containing complex localization	0.00132766	0.0332121	0	0	5	20
GO:0072087 renal vesicle development	5	0.00132766	0.654	0.25	Biological Process	GO:0072087	renal vesicle development	0.00132766	0.0332121	0	0	5	20
GO:0016070 RNA metabolic process	242	0.00133169	31.634	0.051	Biological Process	GO:0016070	RNA metabolic process	0.00133169	0.0332121	0	0	242	4754
GO:0010648 negative regulation of cell communication	84	0.001357	10.98	0.06	Biological Process	GO:0010648	negative regulation of cell communication	0.001357	0.0337235	0	0	84	1406
GO:2000027 regulation of animal organ morphogenesis	22	0.00138705	2.876	0.087	Biological Process	GO:2000027	regulation of animal organ morphogenesis	0.00138705	0.034349	0	0	22	252
GO:0044237 cellular metabolic process	514	0.0013976	67.19	0.047	Biological Process	GO:0044237	cellular metabolic process	0.0013976	0.0344888	0	0	514	11007
GO:0046847 filopodium assembly	9	0.00144089	1.176	0.143	Biological Process	GO:0046847	filopodium assembly	0.00144089	0.0349953	0	0	9	63
GO:0023057 negative regulation of signaling	84	0.00144278	10.98	0.06	Biological Process	GO:0023057	negative regulation of signaling	0.00144278	0.0349953	0	0	84	1409
GO:0046898 response to cycloheximide	3	0.00144788	0.392	0.5	Biological Process	GO:0046898	response to cycloheximide	0.00144788	0.0349953	0	0	3	6
GO:0014002 astrocyte development	7	0.00144799	0.915	0.175	Biological Process	GO:0014002	astrocyte development	0.00144799	0.0349953	0	0	7	40
GO:0072210 metanephric nephron development	7	0.00144799	0.915	0.175	Biological Process	GO:0072210	metanephric nephron development	0.00144799	0.0349953	0	0	7	40
GO:1900117 regulation of execution phase of apoptosis	7	0.00144799	0.915	0.175	Biological Process	GO:1900117	regulation of execution phase of apoptosis	0.00144799	0.0349953	0	0	7	40
GO:0032535 regulation of cellular component size	30	0.00145302	3.922	0.078	Biological Process	GO:0032535	regulation of cellular component size	0.00145302	0.0349953	0	0	30	387
GO:0006493 protein O-linked glycosylation	12	0.00145793	1.569	0.118	Biological Process	GO:0006493	protein O-linked glycosylation	0.00145793	0.0349953	0	0	12	102
GO:0008152 metabolic process	546	0.0014636	71.373	0.046	Biological Process	GO:0008152	metabolic process	0.0014636	0.0350118	0	0	546	11780
GO:0009628 response to abiotic stimulus	76	0.00147184	9.935	0.061	Biological Process	GO:0009628	response to abiotic stimulus	0.00147184	0.0350896	0	0	76	1251
GO:0014812 muscle cell migration	11	0.00151813	1.438	0.124	Biological Process	GO:0014812	muscle cell migration	0.00151813	0.036071	0	0	11	89
GO:0001844 protein insertion into mitochondrial membrane involved in apoptotic signaling pathway	6	0.00153944	0.784	0.2	Biological Process	GO:0001844	protein insertion into mitochondrial membrane involved in apoptotic signaling pathway	0.00153944	0.0363317	0	0	6	30
GO:1902230 negative regulation of intrinsic apoptotic signaling pathway in response to DNA damage	6	0.00153944	0.784	0.2	Biological Process	GO:1902230	negative regulation of intrinsic apoptotic signaling pathway in response to DNA damage	0.00153944	0.0363317	0	0	6	30
GO:0042127 regulation of cell proliferation	96	0.00157143	12.549	0.058	Biological Process	GO:0042127	regulation of cell proliferation	0.00157143	0.0369628	0	0	96	1655
GO:1901576 organic substance biosynthetic process	308	0.00159403	40.261	0.049	Biological Process	GO:1901576	organic substance biosynthetic process	0.00159403	0.0372552	0	0	308	6241
GO:0051271 negative regulation of cellular component movement	26	0.00159446	3.399	0.081	Biological Process	GO:0051271	negative regulation of cellular component movement	0.00159446	0.0372552	0	0	26	321
GO:0007166 cell surface receptor signaling pathway	165	0.001635	21.569	0.053	Biological Process	GO:0007166	cell surface receptor signaling pathway	0.001635	0.038076	0	0	165	3098
GO:0071363 cellular response to growth factor stimulus	47	0.00164386	6.144	0.067	Biological Process	GO:0071363	cellular response to growth factor stimulus	0.00164386	0.038156	0	0	47	697
GO:0090304 nucleic acid metabolic process	266	0.00167475	34.771	0.05	Biological Process	GO:0090304	nucleic acid metabolic process	0.00167475	0.038745	0	0	266	5305
GO:0044843 cell cycle G1/S phase transition	22	0.00169536	2.876	0.086	Biological Process	GO:0044843	cell cycle G1/S phase transition	0.00169536	0.0390933	0	0	22	256
GO:0001944 vasculature development	48	0.0017073	6.275	0.067	Biological Process	GO:0001944	vasculature development	0.0017073	0.0391122	0	0	48	717
GO:0072358 cardiovascular system development	48	0.0017073	6.275	0.067	Biological Process	GO:0072358	cardiovascular system development	0.0017073	0.0391122	0	0	48	717
GO:0044093 positive regulation of molecular function	101	0.00172939	13.203	0.057	Biological Process	GO:0044093	positive regulation of molecular function	0.00172939	0.0394896	0	0	101	1762
GO:0007507 heart development	40	0.00175035	5.229	0.07	Biological Process	GO:0007507	heart development	0.00175035	0.0398388	0	0	40	570
GO:0000902 cell morphogenesis	65	0.00179387	8.497	0.062	Biological Process	GO:0000902	cell morphogenesis	0.00179387	0.0405761	0	0	65	1044
GO:1905668 positive regulation of protein localization to endosome	4	0.00179428	0.523	0.308	Biological Process	GO:1905668	positive regulation of protein localization to endosome	0.00179428	0.0405761	0	0	4	13
GO:0072171 mesonephric tubule morphogenesis	9	0.00180301	1.176	0.138	Biological Process	GO:0072171	mesonephric tubule morphogenesis	0.00180301	0.0406429	0	0	9	65
GO:1901987 regulation of cell cycle phase transition	34	0.00181408	4.444	0.073	Biological Process	GO:1901987	regulation of cell cycle phase transition	0.00181408	0.0407618	0	0	34	463
GO:0034220 ion transmembrane transport	72	0.00182584	9.412	0.061	Biological Process	GO:0034220	ion transmembrane transport	0.00182584	0.0408361	0	0	72	1182
GO:0032989 cellular component morphogenesis	70	0.00184104	9.15	0.061	Biological Process	GO:0032989	cellular component morphogenesis	0.00184104	0.0408361	0	0	70	1143
GO:0003218 cardiac left ventricle formation	2	0.00185663	0.261	1	Biological Process	GO:0003218	cardiac left ventricle formation	0.00185663	0.0408361	0	0	2	2
GO:0061847 response to cholecystokinin	2	0.00185663	0.261	1	Biological Process	GO:0061847	response to cholecystokinin	0.00185663	0.0408361	0	0	2	2
GO:0097156 fasciculation of motor neuron axon	2	0.00185663	0.261	1	Biological Process	GO:0097156	fasciculation of motor neuron axon	0.00185663	0.0408361	0	0	2	2
GO:1905403 negative regulation of activated CD8-positive, alpha-beta T cell apoptotic process	2	0.00185663	0.261	1	Biological Process	GO:1905403	negative regulation of activated CD8-positive, alpha-beta T cell apoptotic process	0.00185663	0.0408361	0	0	2	2
GO:0046902 regulation of mitochondrial membrane permeability	10	0.00185803	1.307	0.128	Biological Process	GO:0046902	regulation of mitochondrial membrane permeability	0.00185803	0.0408361	0	0	10	78
GO:0009058 biosynthetic process	311	0.00194346	40.654	0.049	Biological Process	GO:0009058	biosynthetic process	0.00194346	0.0425805	0	0	311	6327
GO:0006796 phosphate-containing compound metabolic process	179	0.00197022	23.399	0.052	Biological Process	GO:0006796	phosphate-containing compound metabolic process	0.00197022	0.0430328	0	0	179	3412
GO:0036294 cellular response to decreased oxygen levels	19	0.00200944	2.484	0.09	Biological Process	GO:0036294	cellular response to decreased oxygen levels	0.00200944	0.0436203	0	0	19	211
GO:0048857 neural nucleus development	9	0.00200952	1.176	0.136	Biological Process	GO:0048857	neural nucleus development	0.00200952	0.0436203	0	0	9	66
GO:0048708 astrocyte differentiation	10	0.00204699	1.307	0.127	Biological Process	GO:0048708	astrocyte differentiation	0.00204699	0.0442969	0	0	10	79
GO:0043576 regulation of respiratory gaseous exchange	5	0.00209948	0.654	0.227	Biological Process	GO:0043576	regulation of respiratory gaseous exchange	0.00209948	0.0451855	0	0	5	22
GO:0044238 primary metabolic process	508	0.0021036	66.405	0.047	Biological Process	GO:0044238	primary metabolic process	0.0021036	0.0451855	0	0	508	10903
GO:0006793 phosphorus metabolic process	180	0.00211636	23.529	0.052	Biological Process	GO:0006793	phosphorus metabolic process	0.00211636	0.0451855	0	0	180	3439
GO:2001020 regulation of response to DNA damage stimulus	20	0.00211857	2.614	0.088	Biological Process	GO:2001020	regulation of response to DNA damage stimulus	0.00211857	0.0451855	0	0	20	228
GO:2000145 regulation of cell motility	60	0.00212018	7.843	0.063	Biological Process	GO:2000145	regulation of cell motility	0.00212018	0.0451855	0	0	60	954
GO:1901700 response to oxygen-containing compound	96	0.00218601	12.549	0.057	Biological Process	GO:1901700	response to oxygen-containing compound	0.00218601	0.0461585	0	0	96	1673
GO:0007569 cell aging	12	0.00220098	1.569	0.112	Biological Process	GO:0007569	cell aging	0.00220098	0.0461585	0	0	12	107
GO:2000134 negative regulation of G1/S transition of mitotic cell cycle	12	0.00220098	1.569	0.112	Biological Process	GO:2000134	negative regulation of G1/S transition of mitotic cell cycle	0.00220098	0.0461585	0	0	12	107
GO:0010605 negative regulation of macromolecule metabolic process	154	0.00221016	20.131	0.053	Biological Process	GO:0010605	negative regulation of macromolecule metabolic process	0.00221016	0.0461585	0	0	154	2885
GO:0044271 cellular nitrogen compound biosynthetic process	254	0.00221402	33.203	0.05	Biological Process	GO:0044271	cellular nitrogen compound biosynthetic process	0.00221402	0.0461585	0	0	254	5063
GO:0061061 muscle structure development	43	0.0022232	5.621	0.068	Biological Process	GO:0061061	muscle structure development	0.0022232	0.0461585	0	0	43	633
GO:0030307 positive regulation of cell growth	16	0.00222786	2.092	0.096	Biological Process	GO:0030307	positive regulation of cell growth	0.00222786	0.0461585	0	0	16	166
GO:0009892 negative regulation of metabolic process	166	0.00223056	21.699	0.053	Biological Process	GO:0009892	negative regulation of metabolic process	0.00223056	0.0461585	0	0	166	3142
GO:0071229 cellular response to acid chemical	19	0.0022373	2.484	0.089	Biological Process	GO:0071229	cellular response to acid chemical	0.0022373	0.0461585	0	0	19	213
GO:0010559 regulation of glycoprotein biosynthetic process	7	0.00223803	0.915	0.163	Biological Process	GO:0010559	regulation of glycoprotein biosynthetic process	0.00223803	0.0461585	0	0	7	43
GO:0033574 response to testosterone	7	0.00223803	0.915	0.163	Biological Process	GO:0033574	response to testosterone	0.00223803	0.0461585	0	0	7	43
GO:0045785 positive regulation of cell adhesion	32	0.00228812	4.183	0.074	Biological Process	GO:0045785	positive regulation of cell adhesion	0.00228812	0.0470537	0	0	32	434
GO:0001755 neural crest cell migration	8	0.00232773	1.046	0.145	Biological Process	GO:0001755	neural crest cell migration	0.00232773	0.0477287	0	0	8	55
GO:0060562 epithelial tube morphogenesis	26	0.00234131	3.399	0.079	Biological Process	GO:0060562	epithelial tube morphogenesis	0.00234131	0.0478393	0	0	26	330
GO:0071453 cellular response to oxygen levels	20	0.00234673	2.614	0.087	Biological Process	GO:0071453	cellular response to oxygen levels	0.00234673	0.0478393	0	0	20	230
GO:0007254 JNK cascade	19	0.00235914	2.484	0.089	Biological Process	GO:0007254	JNK cascade	0.00235914	0.0479533	0	0	19	214
GO:0071887 leukocyte apoptotic process	12	0.00238147	1.569	0.111	Biological Process	GO:0071887	leukocyte apoptotic process	0.00238147	0.0482164	0	0	12	108
GO:2000045 regulation of G1/S transition of mitotic cell cycle	15	0.00240082	1.961	0.099	Biological Process	GO:2000045	regulation of G1/S transition of mitotic cell cycle	0.00240082	0.0482164	0	0	15	152
GO:0048021 regulation of melanin biosynthetic process	4	0.00242693	0.523	0.286	Biological Process	GO:0048021	regulation of melanin biosynthetic process	0.00242693	0.0482164	0	0	4	14
GO:0048070 regulation of developmental pigmentation	4	0.00242693	0.523	0.286	Biological Process	GO:0048070	regulation of developmental pigmentation	0.00242693	0.0482164	0	0	4	14
GO:0072176 nephric duct development	4	0.00242693	0.523	0.286	Biological Process	GO:0072176	nephric duct development	0.00242693	0.0482164	0	0	4	14
GO:1900121 negative regulation of receptor binding	4	0.00242693	0.523	0.286	Biological Process	GO:1900121	negative regulation of receptor binding	0.00242693	0.0482164	0	0	4	14
GO:1905666 regulation of protein localization to endosome	4	0.00242693	0.523	0.286	Biological Process	GO:1905666	regulation of protein localization to endosome	0.00242693	0.0482164	0	0	4	14
GO:2000774 positive regulation of cellular senescence	4	0.00242693	0.523	0.286	Biological Process	GO:2000774	positive regulation of cellular senescence	0.00242693	0.0482164	0	0	4	14
GO:0050890 cognition	24	0.0024399	3.137	0.081	Biological Process	GO:0050890	cognition	0.0024399	0.0483188	0	0	24	297
GO:0016240 autophagosome membrane docking	3	0.0024527	0.392	0.429	Biological Process	GO:0016240	autophagosome membrane docking	0.0024527	0.0483188	0	0	3	7
GO:0045630 positive regulation of T-helper 2 cell differentiation	3	0.0024527	0.392	0.429	Biological Process	GO:0045630	positive regulation of T-helper 2 cell differentiation	0.0024527	0.0483188	0	0	3	7
GO:0014032 neural crest cell development	10	0.00247131	1.307	0.123	Biological Process	GO:0014032	neural crest cell development	0.00247131	0.0484144	0	0	10	81
GO:1901992 positive regulation of mitotic cell cycle phase transition	10	0.00247131	1.307	0.123	Biological Process	GO:1901992	positive regulation of mitotic cell cycle phase transition	0.00247131	0.0484144	0	0	10	81
GO:0048639 positive regulation of developmental growth	16	0.00251581	2.092	0.095	Biological Process	GO:0048639	positive regulation of developmental growth	0.00251581	0.0491492	0	0	16	168
GO:0032008 positive regulation of TOR signaling	7	0.00256423	0.915	0.159	Biological Process	GO:0032008	positive regulation of TOR signaling	0.00256423	0.0498184	0	0	7	44
GO:0061383 trabecula morphogenesis	7	0.00256423	0.915	0.159	Biological Process	GO:0061383	trabecula morphogenesis	0.00256423	0.0498184	0	0	7	44
GO:0003016 respiratory system process	6	0.00257298	0.784	0.182	Biological Process	GO:0003016	respiratory system process	0.00257298	0.0498506	0	0	6	33
GO:0008361 regulation of cell size	17	0.00258606	2.222	0.092	Biological Process	GO:0008361	regulation of cell size	0.00258606	0.0498792	0	0	17	184
GO:0060384 innervation	5	0.00258864	0.654	0.217	Biological Process	GO:0060384	innervation	0.00258864	0.0498792	0	0	5	23
GO:0000122 negative regulation of transcription by RNA polymerase II	57	0.00263281	7.451	0.063	Biological Process	GO:0000122	negative regulation of transcription by RNA polymerase II	0.00263281	0.0505917	0	0	57	905
GO:0016079 synaptic vesicle exocytosis	12	0.00277869	1.569	0.109	Biological Process	GO:0016079	synaptic vesicle exocytosis	0.00277869	0.0531047	0	0	12	110
GO:1902807 negative regulation of cell cycle G1/S phase transition	12	0.00277869	1.569	0.109	Biological Process	GO:1902807	negative regulation of cell cycle G1/S phase transition	0.00277869	0.0531047	0	0	12	110
GO:1901137 carbohydrate derivative biosynthetic process	50	0.00279497	6.536	0.065	Biological Process	GO:1901137	carbohydrate derivative biosynthetic process	0.00279497	0.053271	0	0	50	773
GO:0048545 response to steroid hormone	29	0.00284598	3.791	0.075	Biological Process	GO:0048545	response to steroid hormone	0.00284598	0.0540966	0	0	29	387
GO:0090066 regulation of anatomical structure size	36	0.00290541	4.706	0.07	Biological Process	GO:0090066	regulation of anatomical structure size	0.00290541	0.0549534	0	0	36	513
GO:0014070 response to organic cyclic compound	59	0.00290668	7.712	0.062	Biological Process	GO:0014070	response to organic cyclic compound	0.00290668	0.0549534	0	0	59	948
GO:0030334 regulation of cell migration	56	0.0029214	7.32	0.063	Biological Process	GO:0030334	regulation of cell migration	0.0029214	0.0550185	0	0	56	890
GO:0035094 response to nicotine	7	0.00292577	0.915	0.156	Biological Process	GO:0035094	response to nicotine	0.00292577	0.0550185	0	0	7	45
GO:0008283 cell proliferation	108	0.00298787	14.118	0.056	Biological Process	GO:0008283	cell proliferation	0.00298787	0.0560365	0	0	108	1938
GO:0035137 hindlimb morphogenesis	6	0.00301228	0.784	0.176	Biological Process	GO:0035137	hindlimb morphogenesis	0.00301228	0.0563441	0	0	6	34
GO:0009725 response to hormone	63	0.00302838	8.235	0.061	Biological Process	GO:0009725	response to hormone	0.00302838	0.056495	0	0	63	1028
GO:0022604 regulation of cell morphogenesis	35	0.00311806	4.575	0.07	Biological Process	GO:0022604	regulation of cell morphogenesis	0.00311806	0.058014	0	0	35	497
GO:0002053 positive regulation of mesenchymal cell proliferation	5	0.00315538	0.654	0.208	Biological Process	GO:0002053	positive regulation of mesenchymal cell proliferation	0.00315538	0.0583995	0	0	5	24
GO:0006582 melanin metabolic process	5	0.00315538	0.654	0.208	Biological Process	GO:0006582	melanin metabolic process	0.00315538	0.0583995	0	0	5	24
GO:0021542 dentate gyrus development	4	0.00319756	0.523	0.267	Biological Process	GO:0021542	dentate gyrus development	0.00319756	0.0588703	0	0	4	15
GO:1900376 regulation of secondary metabolite biosynthetic process	4	0.00319756	0.523	0.267	Biological Process	GO:1900376	regulation of secondary metabolite biosynthetic process	0.00319756	0.0588703	0	0	4	15
GO:0071158 positive regulation of cell cycle arrest	10	0.00323715	1.307	0.119	Biological Process	GO:0071158	positive regulation of cell cycle arrest	0.00323715	0.0594435	0	0	10	84
GO:0120039 plasma membrane bounded cell projection morphogenesis	45	0.00326069	5.882	0.066	Biological Process	GO:0120039	plasma membrane bounded cell projection morphogenesis	0.00326069	0.0597199	0	0	45	684
GO:0001823 mesonephros development	11	0.00328681	1.438	0.112	Biological Process	GO:0001823	mesonephros development	0.00328681	0.060042	0	0	11	98
GO:0031346 positive regulation of cell projection organization	29	0.00329807	3.791	0.074	Biological Process	GO:0031346	positive regulation of cell projection organization	0.00329807	0.0600915	0	0	29	391
GO:0042771 intrinsic apoptotic signaling pathway in response to DNA damage by p53 class mediator	7	0.00332505	0.915	0.152	Biological Process	GO:0042771	intrinsic apoptotic signaling pathway in response to DNA damage by p53 class mediator	0.00332505	0.0604266	0	0	7	46
GO:0043085 positive regulation of catalytic activity	82	0.00335429	10.719	0.058	Biological Process	GO:0043085	positive regulation of catalytic activity	0.00335429	0.0608008	0	0	82	1412
GO:0060070 canonical Wnt signaling pathway	26	0.00336807	3.399	0.077	Biological Process	GO:0060070	canonical Wnt signaling pathway	0.00336807	0.0608937	0	0	26	339
GO:1901988 negative regulation of cell cycle phase transition	21	0.00338389	2.745	0.083	Biological Process	GO:1901988	negative regulation of cell cycle phase transition	0.00338389	0.0609476	0	0	21	254
GO:0048589 developmental growth	42	0.00338839	5.49	0.067	Biological Process	GO:0048589	developmental growth	0.00338839	0.0609476	0	0	42	629
GO:0032990 cell part morphogenesis	46	0.00344812	6.013	0.065	Biological Process	GO:0032990	cell part morphogenesis	0.00344812	0.0618639	0	0	46	705
GO:0006469 negative regulation of protein kinase activity	20	0.00347729	2.614	0.084	Biological Process	GO:0006469	negative regulation of protein kinase activity	0.00347729	0.0620705	0	0	20	238
GO:1901991 negative regulation of mitotic cell cycle phase transition	20	0.00347729	2.614	0.084	Biological Process	GO:1901991	negative regulation of mitotic cell cycle phase transition	0.00347729	0.0620705	0	0	20	238
GO:0051204 protein insertion into mitochondrial membrane	6	0.00350526	0.784	0.171	Biological Process	GO:0051204	protein insertion into mitochondrial membrane	0.00350526	0.0624113	0	0	6	35
GO:0051899 membrane depolarization	10	0.00353064	1.307	0.118	Biological Process	GO:0051899	membrane depolarization	0.00353064	0.0627045	0	0	10	85
GO:0031345 negative regulation of cell projection organization	17	0.00360478	2.222	0.089	Biological Process	GO:0031345	negative regulation of cell projection organization	0.00360478	0.06386	0	0	17	190
GO:0048858 cell projection morphogenesis	45	0.00363107	5.882	0.065	Biological Process	GO:0048858	cell projection morphogenesis	0.00363107	0.0641117	0	0	45	688
GO:0032879 regulation of localization	147	0.00363772	19.216	0.053	Biological Process	GO:0032879	regulation of localization	0.00363772	0.0641117	0	0	147	2772
GO:1902110 positive regulation of mitochondrial membrane permeability involved in apoptotic process	8	0.00364634	1.046	0.136	Biological Process	GO:1902110	positive regulation of mitochondrial membrane permeability involved in apoptotic process	0.00364634	0.0641117	0	0	8	59
GO:0019538 protein metabolic process	296	0.00367914	38.693	0.049	Biological Process	GO:0019538	protein metabolic process	0.00367914	0.0645272	0	0	296	6050
GO:0007611 learning or memory	21	0.00370789	2.745	0.082	Biological Process	GO:0007611	learning or memory	0.00370789	0.0648696	0	0	21	256
GO:0016477 cell migration	88	0.00374791	11.503	0.057	Biological Process	GO:0016477	cell migration	0.00374791	0.0653262	0	0	88	1540
GO:0003223 ventricular compact myocardium morphogenesis	3	0.00379901	0.392	0.375	Biological Process	GO:0003223	ventricular compact myocardium morphogenesis	0.00379901	0.0653262	0	0	3	8
GO:0048023 positive regulation of melanin biosynthetic process	3	0.00379901	0.392	0.375	Biological Process	GO:0048023	positive regulation of melanin biosynthetic process	0.00379901	0.0653262	0	0	3	8
GO:0060371 regulation of atrial cardiac muscle cell membrane depolarization	3	0.00379901	0.392	0.375	Biological Process	GO:0060371	regulation of atrial cardiac muscle cell membrane depolarization	0.00379901	0.0653262	0	0	3	8
GO:0072033 renal vesicle formation	3	0.00379901	0.392	0.375	Biological Process	GO:0072033	renal vesicle formation	0.00379901	0.0653262	0	0	3	8
GO:0072177 mesonephric duct development	3	0.00379901	0.392	0.375	Biological Process	GO:0072177	mesonephric duct development	0.00379901	0.0653262	0	0	3	8
GO:2000766 negative regulation of cytoplasmic translation	3	0.00379901	0.392	0.375	Biological Process	GO:2000766	negative regulation of cytoplasmic translation	0.00379901	0.0653262	0	0	3	8
GO:0048864 stem cell development	10	0.00384485	1.307	0.116	Biological Process	GO:0048864	stem cell development	0.00384485	0.0659533	0	0	10	86
GO:0043200 response to amino acid	12	0.00401066	1.569	0.104	Biological Process	GO:0043200	response to amino acid	0.00401066	0.0684624	0	0	12	115
GO:0051270 regulation of cellular component movement	63	0.00401755	8.235	0.061	Biological Process	GO:0051270	regulation of cellular component movement	0.00401755	0.0684624	0	0	63	1041
GO:0072078 nephron tubule morphogenesis	9	0.0040374	1.176	0.123	Biological Process	GO:0072078	nephron tubule morphogenesis	0.0040374	0.0684624	0	0	9	73
GO:0051385 response to mineralocorticoid	6	0.00405574	0.784	0.167	Biological Process	GO:0051385	response to mineralocorticoid	0.00405574	0.0684624	0	0	6	36
GO:1901030 positive regulation of mitochondrial outer membrane permeabilization involved in apoptotic signaling pathway	6	0.00405574	0.784	0.167	Biological Process	GO:1901030	positive regulation of mitochondrial outer membrane permeabilization involved in apoptotic signaling pathway	0.00405574	0.0684624	0	0	6	36
GO:0042476 odontogenesis	13	0.00405961	1.699	0.1	Biological Process	GO:0042476	odontogenesis	0.00405961	0.0684624	0	0	13	130
GO:0051240 positive regulation of multicellular organismal process	101	0.0040654	13.203	0.056	Biological Process	GO:0051240	positive regulation of multicellular organismal process	0.0040654	0.0684624	0	0	101	1812
GO:0060828 regulation of canonical Wnt signaling pathway	23	0.00407316	3.007	0.079	Biological Process	GO:0060828	regulation of canonical Wnt signaling pathway	0.00407316	0.0684624	0	0	23	292
GO:0006836 neurotransmitter transport	22	0.00407873	2.876	0.08	Biological Process	GO:0006836	neurotransmitter transport	0.00407873	0.0684624	0	0	22	275
GO:0045651 positive regulation of macrophage differentiation	4	0.0041195	0.523	0.25	Biological Process	GO:0045651	positive regulation of macrophage differentiation	0.0041195	0.0688181	0	0	4	16
GO:0060977 coronary vasculature morphogenesis	4	0.0041195	0.523	0.25	Biological Process	GO:0060977	coronary vasculature morphogenesis	0.0041195	0.0688181	0	0	4	16
GO:0051960 regulation of nervous system development	58	0.00413887	7.582	0.061	Biological Process	GO:0051960	regulation of nervous system development	0.00413887	0.068978	0	0	58	944
GO:0048585 negative regulation of response to stimulus	103	0.00416957	13.464	0.056	Biological Process	GO:0048585	negative regulation of response to stimulus	0.00416957	0.0693252	0	0	103	1855
GO:0065007 biological regulation	573	0.00422815	74.902	0.046	Biological Process	GO:0065007	biological regulation	0.00422815	0.0699481	0	0	573	12535
GO:0001822 kidney development	23	0.0042461	3.007	0.078	Biological Process	GO:0001822	kidney development	0.0042461	0.0699481	0	0	23	293
GO:0051489 regulation of filopodium assembly	7	0.00424681	0.915	0.146	Biological Process	GO:0051489	regulation of filopodium assembly	0.00424681	0.0699481	0	0	7	48
GO:1903018 regulation of glycoprotein metabolic process	7	0.00424681	0.915	0.146	Biological Process	GO:1903018	regulation of glycoprotein metabolic process	0.00424681	0.0699481	0	0	7	48
GO:0048705 skeletal system morphogenesis	19	0.00431088	2.484	0.084	Biological Process	GO:0048705	skeletal system morphogenesis	0.00431088	0.0708374	0	0	19	226
GO:0016043 cellular component organization	326	0.00444457	42.614	0.048	Biological Process	GO:0016043	cellular component organization	0.00444457	0.072864	0	0	326	6748
GO:0097435 supramolecular fiber organization	53	0.00448786	6.928	0.062	Biological Process	GO:0097435	supramolecular fiber organization	0.00448786	0.0732936	0	0	53	850
GO:1902686 mitochondrial outer membrane permeabilization involved in programmed cell death	8	0.00449162	1.046	0.131	Biological Process	GO:1902686	mitochondrial outer membrane permeabilization involved in programmed cell death	0.00449162	0.0732936	0	0	8	61
GO:0010001 glial cell differentiation	19	0.0045209	2.484	0.084	Biological Process	GO:0010001	glial cell differentiation	0.0045209	0.0733621	0	0	19	227
GO:0048568 embryonic organ development	31	0.00454539	4.052	0.071	Biological Process	GO:0048568	embryonic organ development	0.00454539	0.0733621	0	0	31	436
GO:0000188 inactivation of MAPK activity	5	0.00454797	0.654	0.192	Biological Process	GO:0000188	inactivation of MAPK activity	0.00454797	0.0733621	0	0	5	26
GO:0072202 cell differentiation involved in metanephros development	5	0.00454797	0.654	0.192	Biological Process	GO:0072202	cell differentiation involved in metanephros development	0.00454797	0.0733621	0	0	5	26
GO:0072273 metanephric nephron morphogenesis	5	0.00454797	0.654	0.192	Biological Process	GO:0072273	metanephric nephron morphogenesis	0.00454797	0.0733621	0	0	5	26
GO:0000086 G2/M transition of mitotic cell cycle	21	0.0046327	2.745	0.08	Biological Process	GO:0000086	G2/M transition of mitotic cell cycle	0.0046327	0.0745578	0	0	21	261
GO:0043516 regulation of DNA damage response, signal transduction by p53 class mediator	6	0.0046676	0.784	0.162	Biological Process	GO:0043516	regulation of DNA damage response, signal transduction by p53 class mediator	0.0046676	0.0749481	0	0	6	37
GO:0001763 morphogenesis of a branching structure	17	0.00468839	2.222	0.087	Biological Process	GO:0001763	morphogenesis of a branching structure	0.00468839	0.0751104	0	0	17	195
GO:0017156 calcium ion regulated exocytosis	14	0.00482778	1.83	0.095	Biological Process	GO:0017156	calcium ion regulated exocytosis	0.00482778	0.076857	0	0	14	148
GO:0044839 cell cycle G2/M phase transition	22	0.00483476	2.876	0.079	Biological Process	GO:0044839	cell cycle G2/M phase transition	0.00483476	0.076857	0	0	22	279
GO:0070227 lymphocyte apoptotic process	9	0.00484113	1.176	0.12	Biological Process	GO:0070227	lymphocyte apoptotic process	0.00484113	0.076857	0	0	9	75
GO:0072088 nephron epithelium morphogenesis	9	0.00484113	1.176	0.12	Biological Process	GO:0072088	nephron epithelium morphogenesis	0.00484113	0.076857	0	0	9	75
GO:0060291 long-term synaptic potentiation	10	0.0049219	1.307	0.112	Biological Process	GO:0060291	long-term synaptic potentiation	0.0049219	0.0779377	0	0	10	89
GO:0032874 positive regulation of stress-activated MAPK cascade	15	0.00493556	1.961	0.091	Biological Process	GO:0032874	positive regulation of stress-activated MAPK cascade	0.00493556	0.0779377	0	0	15	164
GO:0043062 extracellular structure organization	33	0.00494244	4.314	0.069	Biological Process	GO:0043062	extracellular structure organization	0.00494244	0.0779377	0	0	33	475
GO:0010812 negative regulation of cell-substrate adhesion	8	0.00496694	1.046	0.129	Biological Process	GO:0010812	negative regulation of cell-substrate adhesion	0.00496694	0.0781488	0	0	8	62
GO:0010629 negative regulation of gene expression	111	0.00504606	14.51	0.055	Biological Process	GO:0010629	negative regulation of gene expression	0.00504606	0.0792164	0	0	111	2034
GO:0031333 negative regulation of protein complex assembly	14	0.00512365	1.83	0.094	Biological Process	GO:0031333	negative regulation of protein complex assembly	0.00512365	0.0796022	0	0	14	149
GO:0031124 mRNA 3'-end processing	11	0.00518999	1.438	0.106	Biological Process	GO:0031124	mRNA 3'-end processing	0.00518999	0.0796022	0	0	11	104
GO:0032872 regulation of stress-activated MAPK cascade	19	0.00520219	2.484	0.083	Biological Process	GO:0032872	regulation of stress-activated MAPK cascade	0.00520219	0.0796022	0	0	19	230
GO:0051348 negative regulation of transferase activity	23	0.00520546	3.007	0.077	Biological Process	GO:0051348	negative regulation of transferase activity	0.00520546	0.0796022	0	0	23	298
GO:0014874 response to stimulus involved in regulation of muscle adaptation	4	0.00520548	0.523	0.235	Biological Process	GO:0014874	response to stimulus involved in regulation of muscle adaptation	0.00520548	0.0796022	0	0	4	17
GO:1900363 regulation of mRNA polyadenylation	4	0.00520548	0.523	0.235	Biological Process	GO:1900363	regulation of mRNA polyadenylation	0.00520548	0.0796022	0	0	4	17
GO:0051100 negative regulation of binding	15	0.00521967	1.961	0.091	Biological Process	GO:0051100	negative regulation of binding	0.00521967	0.0796022	0	0	15	165
GO:0061138 morphogenesis of a branching epithelium	16	0.00523631	2.092	0.088	Biological Process	GO:0061138	morphogenesis of a branching epithelium	0.00523631	0.0796022	0	0	16	181
GO:0071901 negative regulation of protein serine/threonine kinase activity	13	0.00524918	1.699	0.097	Biological Process	GO:0071901	negative regulation of protein serine/threonine kinase activity	0.00524918	0.0796022	0	0	13	134
GO:0071560 cellular response to transforming growth factor beta stimulus	20	0.00525888	2.614	0.081	Biological Process	GO:0071560	cellular response to transforming growth factor beta stimulus	0.00525888	0.0796022	0	0	20	247
GO:0032465 regulation of cytokinesis	10	0.00532917	1.307	0.111	Biological Process	GO:0032465	regulation of cytokinesis	0.00532917	0.0796022	0	0	10	90
GO:0023052 signaling	323	0.00534319	42.222	0.048	Biological Process	GO:0023052	signaling	0.00534319	0.0796022	0	0	323	6699
GO:0007223 Wnt signaling pathway, calcium modulating pathway	6	0.00534475	0.784	0.158	Biological Process	GO:0007223	Wnt signaling pathway, calcium modulating pathway	0.00534475	0.0796022	0	0	6	38
GO:0060537 muscle tissue development	28	0.00538347	3.66	0.072	Biological Process	GO:0060537	muscle tissue development	0.00538347	0.0796022	0	0	28	387
GO:0000320 re-entry into mitotic cell cycle	2	0.00541019	0.261	0.667	Biological Process	GO:0000320	re-entry into mitotic cell cycle	0.00541019	0.0796022	0	0	2	3
GO:0002904 positive regulation of B cell apoptotic process	2	0.00541019	0.261	0.667	Biological Process	GO:0002904	positive regulation of B cell apoptotic process	0.00541019	0.0796022	0	0	2	3
GO:0035986 senescence-associated heterochromatin focus assembly	2	0.00541019	0.261	0.667	Biological Process	GO:0035986	senescence-associated heterochromatin focus assembly	0.00541019	0.0796022	0	0	2	3
GO:0048925 lateral line system development	2	0.00541019	0.261	0.667	Biological Process	GO:0048925	lateral line system development	0.00541019	0.0796022	0	0	2	3
GO:0072180 mesonephric duct morphogenesis	2	0.00541019	0.261	0.667	Biological Process	GO:0072180	mesonephric duct morphogenesis	0.00541019	0.0796022	0	0	2	3
GO:0090402 oncogene-induced cell senescence	2	0.00541019	0.261	0.667	Biological Process	GO:0090402	oncogene-induced cell senescence	0.00541019	0.0796022	0	0	2	3
GO:0097026 dendritic cell dendrite assembly	2	0.00541019	0.261	0.667	Biological Process	GO:0097026	dendritic cell dendrite assembly	0.00541019	0.0796022	0	0	2	3
GO:0097155 fasciculation of sensory neuron axon	2	0.00541019	0.261	0.667	Biological Process	GO:0097155	fasciculation of sensory neuron axon	0.00541019	0.0796022	0	0	2	3
GO:0110021 cardiac muscle myoblast proliferation	2	0.00541019	0.261	0.667	Biological Process	GO:0110021	cardiac muscle myoblast proliferation	0.00541019	0.0796022	0	0	2	3
GO:0110022 regulation of cardiac muscle myoblast proliferation	2	0.00541019	0.261	0.667	Biological Process	GO:0110022	regulation of cardiac muscle myoblast proliferation	0.00541019	0.0796022	0	0	2	3
GO:0110024 positive regulation of cardiac muscle myoblast proliferation	2	0.00541019	0.261	0.667	Biological Process	GO:0110024	positive regulation of cardiac muscle myoblast proliferation	0.00541019	0.0796022	0	0	2	3
GO:1903233 regulation of calcium ion-dependent exocytosis of neurotransmitter	2	0.00541019	0.261	0.667	Biological Process	GO:1903233	regulation of calcium ion-dependent exocytosis of neurotransmitter	0.00541019	0.0796022	0	0	2	3
GO:1905397 activated CD8-positive, alpha-beta T cell apoptotic process	2	0.00541019	0.261	0.667	Biological Process	GO:1905397	activated CD8-positive, alpha-beta T cell apoptotic process	0.00541019	0.0796022	0	0	2	3
GO:1905402 regulation of activated CD8-positive, alpha-beta T cell apoptotic process	2	0.00541019	0.261	0.667	Biological Process	GO:1905402	regulation of activated CD8-positive, alpha-beta T cell apoptotic process	0.00541019	0.0796022	0	0	2	3
GO:1990911 response to psychosocial stress	2	0.00541019	0.261	0.667	Biological Process	GO:1990911	response to psychosocial stress	0.00541019	0.0796022	0	0	2	3
GO:2000547 regulation of dendritic cell dendrite assembly	2	0.00541019	0.261	0.667	Biological Process	GO:2000547	regulation of dendritic cell dendrite assembly	0.00541019	0.0796022	0	0	2	3
GO:0080134 regulation of response to stress	98	0.00544229	12.81	0.055	Biological Process	GO:0080134	regulation of response to stress	0.00544229	0.079673	0	0	98	1768
GO:0007160 cell-matrix adhesion	19	0.0054472	2.484	0.082	Biological Process	GO:0007160	cell-matrix adhesion	0.0054472	0.079673	0	0	19	231
GO:0035794 positive regulation of mitochondrial membrane permeability	8	0.00547983	1.046	0.127	Biological Process	GO:0035794	positive regulation of mitochondrial membrane permeability	0.00547983	0.079673	0	0	8	63
GO:1903829 positive regulation of cellular protein localization	26	0.0055049	3.399	0.074	Biological Process	GO:1903829	positive regulation of cellular protein localization	0.0055049	0.079673	0	0	26	352
GO:0070304 positive regulation of stress-activated protein kinase signaling cascade	15	0.00551687	1.961	0.09	Biological Process	GO:0070304	positive regulation of stress-activated protein kinase signaling cascade	0.00551687	0.079673	0	0	15	166
GO:0060346 bone trabecula formation	3	0.00551696	0.392	0.333	Biological Process	GO:0060346	bone trabecula formation	0.00551696	0.079673	0	0	3	9
GO:0061299 retina vasculature morphogenesis in camera-type eye	3	0.00551696	0.392	0.333	Biological Process	GO:0061299	retina vasculature morphogenesis in camera-type eye	0.00551696	0.079673	0	0	3	9
GO:0070922 small RNA loading onto RISC	3	0.00551696	0.392	0.333	Biological Process	GO:0070922	small RNA loading onto RISC	0.00551696	0.079673	0	0	3	9
GO:1900378 positive regulation of secondary metabolite biosynthetic process	3	0.00551696	0.392	0.333	Biological Process	GO:1900378	positive regulation of secondary metabolite biosynthetic process	0.00551696	0.079673	0	0	3	9
GO:0014706 striated muscle tissue development	27	0.00555002	3.529	0.073	Biological Process	GO:0014706	striated muscle tissue development	0.00555002	0.0799862	0	0	27	370
GO:0042770 signal transduction in response to DNA damage	13	0.00558639	1.699	0.096	Biological Process	GO:0042770	signal transduction in response to DNA damage	0.00558639	0.0801818	0	0	13	135
GO:0046330 positive regulation of JNK cascade	13	0.00558639	1.699	0.096	Biological Process	GO:0046330	positive regulation of JNK cascade	0.00558639	0.0801818	0	0	13	135
GO:0040013 negative regulation of locomotion	25	0.00564098	3.268	0.075	Biological Process	GO:0040013	negative regulation of locomotion	0.00564098	0.0808004	0	0	25	335
GO:0016331 morphogenesis of embryonic epithelium	14	0.00575923	1.83	0.093	Biological Process	GO:0016331	morphogenesis of embryonic epithelium	0.00575923	0.0810747	0	0	14	151
GO:0048754 branching morphogenesis of an epithelial tube	14	0.00575923	1.83	0.093	Biological Process	GO:0048754	branching morphogenesis of an epithelial tube	0.00575923	0.0810747	0	0	14	151
GO:0014033 neural crest cell differentiation	10	0.00576235	1.307	0.11	Biological Process	GO:0014033	neural crest cell differentiation	0.00576235	0.0810747	0	0	10	91
GO:0090559 regulation of membrane permeability	10	0.00576235	1.307	0.11	Biological Process	GO:0090559	regulation of membrane permeability	0.00576235	0.0810747	0	0	10	91
GO:0097306 cellular response to alcohol	10	0.00576235	1.307	0.11	Biological Process	GO:0097306	cellular response to alcohol	0.00576235	0.0810747	0	0	10	91
GO:0021675 nerve development	9	0.00576388	1.176	0.117	Biological Process	GO:0021675	nerve development	0.00576388	0.0810747	0	0	9	77
GO:0061333 renal tubule morphogenesis	9	0.00576388	1.176	0.117	Biological Process	GO:0061333	renal tubule morphogenesis	0.00576388	0.0810747	0	0	9	77
GO:0072028 nephron morphogenesis	9	0.00576388	1.176	0.117	Biological Process	GO:0072028	nephron morphogenesis	0.00576388	0.0810747	0	0	9	77
GO:0072332 intrinsic apoptotic signaling pathway by p53 class mediator	9	0.00576388	1.176	0.117	Biological Process	GO:0072332	intrinsic apoptotic signaling pathway by p53 class mediator	0.00576388	0.0810747	0	0	9	77
GO:0022406 membrane docking	16	0.00581359	2.092	0.087	Biological Process	GO:0022406	membrane docking	0.00581359	0.0814567	0	0	16	183
GO:0009968 negative regulation of signal transduction	75	0.0058142	9.804	0.058	Biological Process	GO:0009968	negative regulation of signal transduction	0.0058142	0.0814567	0	0	75	1300
GO:0018215 protein phosphopantetheinylation	18	0.00588133	2.353	0.083	Biological Process	GO:0018215	protein phosphopantetheinylation	0.00588133	0.0822334	0	0	18	216
GO:0035690 cellular response to drug	27	0.00595374	3.529	0.073	Biological Process	GO:0035690	cellular response to drug	0.00595374	0.0828591	0	0	27	372
GO:0070302 regulation of stress-activated protein kinase signaling cascade	19	0.00596565	2.484	0.082	Biological Process	GO:0070302	regulation of stress-activated protein kinase signaling cascade	0.00596565	0.0828591	0	0	19	233
GO:0035196 production of miRNAs involved in gene silencing by miRNA	7	0.00597558	0.915	0.137	Biological Process	GO:0035196	production of miRNAs involved in gene silencing by miRNA	0.00597558	0.0828591	0	0	7	51
GO:0090342 regulation of cell aging	7	0.00597558	0.915	0.137	Biological Process	GO:0090342	regulation of cell aging	0.00597558	0.0828591	0	0	7	51
GO:0021549 cerebellum development	11	0.00598872	1.438	0.104	Biological Process	GO:0021549	cerebellum development	0.00598872	0.0828591	0	0	11	106
GO:0033002 muscle cell proliferation	17	0.00602538	2.222	0.085	Biological Process	GO:0033002	muscle cell proliferation	0.00602538	0.0828591	0	0	17	200
GO:0003206 cardiac chamber morphogenesis	12	0.00603069	1.569	0.099	Biological Process	GO:0003206	cardiac chamber morphogenesis	0.00603069	0.0828591	0	0	12	121
GO:0060675 ureteric bud morphogenesis	8	0.00603211	1.046	0.125	Biological Process	GO:0060675	ureteric bud morphogenesis	0.00603211	0.0828591	0	0	8	64
GO:1902108 regulation of mitochondrial membrane permeability involved in apoptotic process	8	0.00603211	1.046	0.125	Biological Process	GO:1902108	regulation of mitochondrial membrane permeability involved in apoptotic process	0.00603211	0.0828591	0	0	8	64
GO:0046677 response to antibiotic	25	0.00607379	3.268	0.074	Biological Process	GO:0046677	response to antibiotic	0.00607379	0.0832689	0	0	25	337
GO:0072001 renal system development	23	0.00609668	3.007	0.076	Biological Process	GO:0072001	renal system development	0.00609668	0.0834201	0	0	23	302
GO:0048812 neuron projection morphogenesis	43	0.00612359	5.621	0.064	Biological Process	GO:0048812	neuron projection morphogenesis	0.00612359	0.0836256	0	0	43	670
GO:0060260 regulation of transcription initiation from RNA polymerase II promoter	9	0.00627334	1.176	0.115	Biological Process	GO:0060260	regulation of transcription initiation from RNA polymerase II promoter	0.00627334	0.0855046	0	0	9	78
GO:0051253 negative regulation of RNA metabolic process	82	0.00628679	10.719	0.057	Biological Process	GO:0051253	negative regulation of RNA metabolic process	0.00628679	0.0855222	0	0	82	1447
GO:0017148 negative regulation of translation	13	0.00631268	1.699	0.095	Biological Process	GO:0017148	negative regulation of translation	0.00631268	0.0856058	0	0	13	137
GO:0051248 negative regulation of protein metabolic process	66	0.00632777	8.627	0.059	Biological Process	GO:0051248	negative regulation of protein metabolic process	0.00632777	0.0856058	0	0	66	1123
GO:0045117 azole transport	5	0.00632945	0.654	0.179	Biological Process	GO:0045117	azole transport	0.00632945	0.0856058	0	0	5	28
GO:0051050 positive regulation of transport	57	0.0063549	7.451	0.06	Biological Process	GO:0051050	positive regulation of transport	0.0063549	0.0857851	0	0	57	944
GO:0010720 positive regulation of cell development	37	0.00640751	4.837	0.066	Biological Process	GO:0010720	positive regulation of cell development	0.00640751	0.0862048	0	0	37	558
GO:0045934 negative regulation of nucleobase-containing compound metabolic process	89	0.00641051	11.634	0.056	Biological Process	GO:0045934	negative regulation of nucleobase-containing compound metabolic process	0.00641051	0.0862048	0	0	89	1592
GO:0071705 nitrogen compound transport	118	0.00644501	15.425	0.054	Biological Process	GO:0071705	nitrogen compound transport	0.00644501	0.086494	0	0	118	2198
GO:0007269 neurotransmitter secretion	14	0.00645661	1.83	0.092	Biological Process	GO:0007269	neurotransmitter secretion	0.00645661	0.086494	0	0	14	153
GO:0007517 muscle organ development	27	0.00660493	3.529	0.072	Biological Process	GO:0007517	muscle organ development	0.00660493	0.0883127	0	0	27	375
GO:0030888 regulation of B cell proliferation	8	0.00662567	1.046	0.123	Biological Process	GO:0030888	regulation of B cell proliferation	0.00662567	0.0884219	0	0	8	65
GO:0050804 modulation of chemical synaptic transmission	31	0.0066825	4.052	0.069	Biological Process	GO:0050804	modulation of chemical synaptic transmission	0.0066825	0.0890115	0	0	31	448
GO:0001657 ureteric bud development	10	0.00671074	1.307	0.108	Biological Process	GO:0001657	ureteric bud development	0.00671074	0.0892186	0	0	10	93
GO:0007154 cell communication	323	0.0068184	42.222	0.048	Biological Process	GO:0007154	cell communication	0.0068184	0.0900479	0	0	323	6725
GO:0071559 response to transforming growth factor beta	20	0.00682043	2.614	0.079	Biological Process	GO:0071559	response to transforming growth factor beta	0.00682043	0.0900479	0	0	20	253
GO:0099643 signal release from synapse	14	0.00682975	1.83	0.091	Biological Process	GO:0099643	signal release from synapse	0.00682975	0.0900479	0	0	14	154
GO:1903825 organic acid transmembrane transport	14	0.00682975	1.83	0.091	Biological Process	GO:1903825	organic acid transmembrane transport	0.00682975	0.0900479	0	0	14	154
GO:0040012 regulation of locomotion	61	0.00684745	7.974	0.059	Biological Process	GO:0040012	regulation of locomotion	0.00684745	0.0900479	0	0	61	1027
GO:0051179 localization	325	0.00684994	42.484	0.048	Biological Process	GO:0051179	localization	0.00684994	0.0900479	0	0	325	6771
GO:0099177 regulation of trans-synaptic signaling	31	0.00689323	4.052	0.069	Biological Process	GO:0099177	regulation of trans-synaptic signaling	0.00689323	0.0904479	0	0	31	449
GO:2000146 negative regulation of cell motility	22	0.00696691	2.876	0.076	Biological Process	GO:2000146	negative regulation of cell motility	0.00696691	0.0912445	0	0	22	288
GO:0071702 organic substance transport	137	0.00700719	17.908	0.053	Biological Process	GO:0071702	organic substance transport	0.00700719	0.0916014	0	0	137	2608
GO:0006811 ion transport	93	0.00720255	12.157	0.055	Biological Process	GO:0006811	ion transport	0.00720255	0.09362	0	0	93	1682
GO:0050806 positive regulation of synaptic transmission	15	0.00721453	1.961	0.088	Biological Process	GO:0050806	positive regulation of synaptic transmission	0.00721453	0.09362	0	0	15	171
GO:0060993 kidney morphogenesis	10	0.00722816	1.307	0.106	Biological Process	GO:0060993	kidney morphogenesis	0.00722816	0.09362	0	0	10	94
GO:0072163 mesonephric epithelium development	10	0.00722816	1.307	0.106	Biological Process	GO:0072163	mesonephric epithelium development	0.00722816	0.09362	0	0	10	94
GO:0072164 mesonephric tubule development	10	0.00722816	1.307	0.106	Biological Process	GO:0072164	mesonephric tubule development	0.00722816	0.09362	0	0	10	94
GO:0031571 mitotic G1 DNA damage checkpoint	8	0.00726238	1.046	0.121	Biological Process	GO:0031571	mitotic G1 DNA damage checkpoint	0.00726238	0.093718	0	0	8	66
GO:0150076 neuroinflammatory response	8	0.00726238	1.046	0.121	Biological Process	GO:0150076	neuroinflammatory response	0.00726238	0.093718	0	0	8	66
GO:0050678 regulation of epithelial cell proliferation	25	0.0072774	3.268	0.073	Biological Process	GO:0050678	regulation of epithelial cell proliferation	0.0072774	0.0937398	0	0	25	342
GO:1903708 positive regulation of hemopoiesis	17	0.00730476	2.222	0.083	Biological Process	GO:1903708	positive regulation of hemopoiesis	0.00730476	0.0939203	0	0	17	204
GO:0030336 negative regulation of cell migration	21	0.00735029	2.745	0.077	Biological Process	GO:0030336	negative regulation of cell migration	0.00735029	0.0943332	0	0	21	272
GO:2000765 regulation of cytoplasmic translation	5	0.00738193	0.654	0.172	Biological Process	GO:2000765	regulation of cytoplasmic translation	0.00738193	0.0945667	0	0	5	29
GO:0048871 multicellular organismal homeostasis	34	0.00741452	4.444	0.067	Biological Process	GO:0048871	multicellular organismal homeostasis	0.00741452	0.0948115	0	0	34	507
GO:0034764 positive regulation of transmembrane transport	19	0.00744006	2.484	0.08	Biological Process	GO:0034764	positive regulation of transmembrane transport	0.00744006	0.0949654	0	0	19	238
GO:0006139 nucleobase-containing compound metabolic process	290	0.00746265	37.908	0.048	Biological Process	GO:0006139	nucleobase-containing compound metabolic process	0.00746265	0.0950812	0	0	290	5987
GO:0070482 response to oxygen levels	28	0.00753606	3.66	0.071	Biological Process	GO:0070482	response to oxygen levels	0.00753606	0.0958429	0	0	28	397
GO:0031589 cell-substrate adhesion	26	0.00756662	3.399	0.072	Biological Process	GO:0031589	cell-substrate adhesion	0.00756662	0.0960228	0	0	26	361
GO:0097190 apoptotic signaling pathway	39	0.00757752	5.098	0.065	Biological Process	GO:0097190	apoptotic signaling pathway	0.00757752	0.0960228	0	0	39	602
GO:0010977 negative regulation of neuron projection development	14	0.00762758	1.83	0.09	Biological Process	GO:0010977	negative regulation of neuron projection development	0.00762758	0.0961787	0	0	14	156
GO:0072178 nephric duct morphogenesis	3	0.00763084	0.392	0.3	Biological Process	GO:0072178	nephric duct morphogenesis	0.00763084	0.0961787	0	0	3	10
GO:1900247 regulation of cytoplasmic translational elongation	3	0.00763084	0.392	0.3	Biological Process	GO:1900247	regulation of cytoplasmic translational elongation	0.00763084	0.0961787	0	0	3	10
GO:0007423 sensory organ development	37	0.00776366	4.837	0.065	Biological Process	GO:0007423	sensory organ development	0.00776366	0.0973094	0	0	37	565
GO:0001838 embryonic epithelial tube formation	12	0.00777448	1.569	0.096	Biological Process	GO:0001838	embryonic epithelial tube formation	0.00777448	0.0973094	0	0	12	125
GO:0051101 regulation of DNA binding	12	0.00777448	1.569	0.096	Biological Process	GO:0051101	regulation of DNA binding	0.00777448	0.0973094	0	0	12	125
GO:0000079 regulation of cyclin-dependent protein serine/threonine kinase activity	10	0.0077759	1.307	0.105	Biological Process	GO:0000079	regulation of cyclin-dependent protein serine/threonine kinase activity	0.0077759	0.0973094	0	0	10	95
GO:0055085 transmembrane transport	90	0.00781917	11.765	0.055	Biological Process	GO:0055085	transmembrane transport	0.00781917	0.0976771	0	0	90	1625
GO:0060322 head development	50	0.00785483	6.536	0.061	Biological Process	GO:0060322	head development	0.00785483	0.0978477	0	0	50	816
GO:0003215 cardiac right ventricle morphogenesis	4	0.00791702	0.523	0.211	Biological Process	GO:0003215	cardiac right ventricle morphogenesis	0.00791702	0.0978477	0	0	4	19
GO:0042474 middle ear morphogenesis	4	0.00791702	0.523	0.211	Biological Process	GO:0042474	middle ear morphogenesis	0.00791702	0.0978477	0	0	4	19
GO:0070262 peptidyl-serine dephosphorylation	4	0.00791702	0.523	0.211	Biological Process	GO:0070262	peptidyl-serine dephosphorylation	0.00791702	0.0978477	0	0	4	19
GO:0072077 renal vesicle morphogenesis	4	0.00791702	0.523	0.211	Biological Process	GO:0072077	renal vesicle morphogenesis	0.00791702	0.0978477	0	0	4	19
GO:0044783 G1 DNA damage checkpoint	8	0.00794413	1.046	0.119	Biological Process	GO:0044783	G1 DNA damage checkpoint	0.00794413	0.0978477	0	0	8	67
GO:0044819 mitotic G1/S transition checkpoint	8	0.00794413	1.046	0.119	Biological Process	GO:0044819	mitotic G1/S transition checkpoint	0.00794413	0.0978477	0	0	8	67
GO:1905710 positive regulation of membrane permeability	8	0.00794413	1.046	0.119	Biological Process	GO:1905710	positive regulation of membrane permeability	0.00794413	0.0978477	0	0	8	67
GO:0048514 blood vessel morphogenesis	39	0.00798338	5.098	0.065	Biological Process	GO:0048514	blood vessel morphogenesis	0.00798338	0.0981593	0	0	39	604
GO:0043393 regulation of protein binding	17	0.00802196	2.222	0.083	Biological Process	GO:0043393	regulation of protein binding	0.00802196	0.0984615	0	0	17	206
GO:0031050 dsRNA processing	7	0.00818189	0.915	0.13	Biological Process	GO:0031050	dsRNA processing	0.00818189	0.0999014	0	0	7	54
GO:0070231 T cell apoptotic process	7	0.00818189	0.915	0.13	Biological Process	GO:0070231	T cell apoptotic process	0.00818189	0.0999014	0	0	7	54
GO:0070918 production of small RNA involved in gene silencing by RNA	7	0.00818189	0.915	0.13	Biological Process	GO:0070918	production of small RNA involved in gene silencing by RNA	0.00818189	0.0999014	0	0	7	54
GO:0032446 protein modification by small protein conjugation	58	0.00834432	7.582	0.059	Biological Process	GO:0032446	protein modification by small protein conjugation	0.00834432	0.101708	0	0	58	977
GO:0043618 regulation of transcription from RNA polymerase II promoter in response to stress	11	0.00841052	1.438	0.099	Biological Process	GO:0043618	regulation of transcription from RNA polymerase II promoter in response to stress	0.00841052	0.101908	0	0	11	111
GO:0000910 cytokinesis	15	0.00841867	1.961	0.086	Biological Process	GO:0000910	cytokinesis	0.00841867	0.101908	0	0	15	174
GO:0140056 organelle localization by membrane tethering	15	0.00841867	1.961	0.086	Biological Process	GO:0140056	organelle localization by membrane tethering	0.00841867	0.101908	0	0	15	174
GO:1902806 regulation of cell cycle G1/S phase transition	15	0.00841867	1.961	0.086	Biological Process	GO:1902806	regulation of cell cycle G1/S phase transition	0.00841867	0.101908	0	0	15	174
GO:0023061 signal release	31	0.00852854	4.052	0.068	Biological Process	GO:0023061	signal release	0.00852854	0.102971	0	0	31	456
GO:0051491 positive regulation of filopodium assembly	5	0.00855043	0.654	0.167	Biological Process	GO:0051491	positive regulation of filopodium assembly	0.00855043	0.102971	0	0	5	30
GO:0071480 cellular response to gamma radiation	5	0.00855043	0.654	0.167	Biological Process	GO:0071480	cellular response to gamma radiation	0.00855043	0.102971	0	0	5	30
GO:0001570 vasculogenesis	9	0.00866472	1.176	0.11	Biological Process	GO:0001570	vasculogenesis	0.00866472	0.103991	0	0	9	82
GO:2000106 regulation of leukocyte apoptotic process	9	0.00866472	1.176	0.11	Biological Process	GO:2000106	regulation of leukocyte apoptotic process	0.00866472	0.103991	0	0	9	82
GO:1901215 negative regulation of neuron death	17	0.00879464	2.222	0.082	Biological Process	GO:1901215	negative regulation of neuron death	0.00879464	0.105371	0	0	17	208
GO:1901655 cellular response to ketone	10	0.00896681	1.307	0.103	Biological Process	GO:1901655	cellular response to ketone	0.00896681	0.107004	0	0	10	97
GO:0032526 response to retinoic acid	11	0.00897494	1.438	0.098	Biological Process	GO:0032526	response to retinoic acid	0.00897494	0.107004	0	0	11	112
GO:0048584 positive regulation of response to stimulus	131	0.00897661	17.124	0.052	Biological Process	GO:0048584	positive regulation of response to stimulus	0.00897661	0.107004	0	0	131	2499
GO:0003229 ventricular cardiac muscle tissue development	7	0.00903562	0.915	0.127	Biological Process	GO:0003229	ventricular cardiac muscle tissue development	0.00903562	0.107163	0	0	7	55
GO:0010332 response to gamma radiation	7	0.00903562	0.915	0.127	Biological Process	GO:0010332	response to gamma radiation	0.00903562	0.107163	0	0	7	55
GO:0070228 regulation of lymphocyte apoptotic process	7	0.00903562	0.915	0.127	Biological Process	GO:0070228	regulation of lymphocyte apoptotic process	0.00903562	0.107163	0	0	7	55
GO:0033673 negative regulation of kinase activity	20	0.00910022	2.614	0.077	Biological Process	GO:0033673	negative regulation of kinase activity	0.00910022	0.107572	0	0	20	260
GO:0034762 regulation of transmembrane transport	38	0.00910069	4.967	0.064	Biological Process	GO:0034762	regulation of transmembrane transport	0.00910069	0.107572	0	0	38	590
GO:0009952 anterior/posterior pattern specification	17	0.00920271	2.222	0.081	Biological Process	GO:0009952	anterior/posterior pattern specification	0.00920271	0.108413	0	0	17	209
GO:0099003 vesicle-mediated transport in synapse	17	0.00920271	2.222	0.081	Biological Process	GO:0099003	vesicle-mediated transport in synapse	0.00920271	0.108413	0	0	17	209
GO:0006367 transcription initiation from RNA polymerase II promoter	18	0.00923582	2.353	0.08	Biological Process	GO:0006367	transcription initiation from RNA polymerase II promoter	0.00923582	0.108621	0	0	18	226
GO:0006839 mitochondrial transport	21	0.00930989	2.745	0.076	Biological Process	GO:0006839	mitochondrial transport	0.00930989	0.10931	0	0	21	278
GO:0008625 extrinsic apoptotic signaling pathway via death domain receptors	9	0.00935812	1.176	0.108	Biological Process	GO:0008625	extrinsic apoptotic signaling pathway via death domain receptors	0.00935812	0.10951	0	0	9	83
GO:0043502 regulation of muscle adaptation	9	0.00935812	1.176	0.108	Biological Process	GO:0043502	regulation of muscle adaptation	0.00935812	0.10951	0	0	9	83
GO:0071840 cellular component organization or biogenesis	332	0.00943421	43.399	0.048	Biological Process	GO:0071840	cellular component organization or biogenesis	0.00943421	0.109858	0	0	332	6966
GO:0007093 mitotic cell cycle checkpoint	14	0.00944446	1.83	0.087	Biological Process	GO:0007093	mitotic cell cycle checkpoint	0.00944446	0.109858	0	0	14	160
GO:2001242 regulation of intrinsic apoptotic signaling pathway	14	0.00944446	1.83	0.087	Biological Process	GO:2001242	regulation of intrinsic apoptotic signaling pathway	0.00944446	0.109858	0	0	14	160
GO:0043507 positive regulation of JUN kinase activity	8	0.00945033	1.046	0.116	Biological Process	GO:0043507	positive regulation of JUN kinase activity	0.00945033	0.109858	0	0	8	69
GO:0048880 sensory system development	27	0.00951775	3.529	0.07	Biological Process	GO:0048880	sensory system development	0.00951775	0.110272	0	0	27	386
GO:0050679 positive regulation of epithelial cell proliferation	16	0.00952047	2.092	0.083	Biological Process	GO:0050679	positive regulation of epithelial cell proliferation	0.00952047	0.110272	0	0	16	193
GO:0007167 enzyme linked receptor protein signaling pathway	62	0.00954485	8.105	0.058	Biological Process	GO:0007167	enzyme linked receptor protein signaling pathway	0.00954485	0.110272	0	0	62	1064
GO:0070233 negative regulation of T cell apoptotic process	4	0.00956436	0.523	0.2	Biological Process	GO:0070233	negative regulation of T cell apoptotic process	0.00956436	0.110272	0	0	4	20
GO:0071731 response to nitric oxide	4	0.00956436	0.523	0.2	Biological Process	GO:0071731	response to nitric oxide	0.00956436	0.110272	0	0	4	20
GO:0070570 regulation of neuron projection regeneration	5	0.00984085	0.654	0.161	Biological Process	GO:0070570	regulation of neuron projection regeneration	0.00984085	0.112954	0	0	5	31
GO:0002686 negative regulation of leukocyte migration	6	0.00984515	0.784	0.14	Biological Process	GO:0002686	negative regulation of leukocyte migration	0.00984515	0.112954	0	0	6	43
GO:0097352 autophagosome maturation	6	0.00984515	0.784	0.14	Biological Process	GO:0097352	autophagosome maturation	0.00984515	0.112954	0	0	6	43
GO:0006820 anion transport	41	0.00992093	5.359	0.063	Biological Process	GO:0006820	anion transport	0.00992093	0.113638	0	0	41	651
GO:0099536 synaptic signaling	45	0.010011	5.882	0.062	Biological Process	GO:0099536	synaptic signaling	0.010011	0.114484	0	0	45	729
GO:0071396 cellular response to lipid	39	0.0100412	5.098	0.064	Biological Process	GO:0071396	cellular response to lipid	0.0100412	0.114614	0	0	39	613
GO:0002182 cytoplasmic translational elongation	3	0.0101597	0.392	0.273	Biological Process	GO:0002182	cytoplasmic translational elongation	0.0101597	0.114614	0	0	3	11
GO:0006853 carnitine shuttle	3	0.0101597	0.392	0.273	Biological Process	GO:0006853	carnitine shuttle	0.0101597	0.114614	0	0	3	11
GO:0039532 negative regulation of viral-induced cytoplasmic pattern recognition receptor signaling pathway	3	0.0101597	0.392	0.273	Biological Process	GO:0039532	negative regulation of viral-induced cytoplasmic pattern recognition receptor signaling pathway	0.0101597	0.114614	0	0	3	11
GO:0045628 regulation of T-helper 2 cell differentiation	3	0.0101597	0.392	0.273	Biological Process	GO:0045628	regulation of T-helper 2 cell differentiation	0.0101597	0.114614	0	0	3	11
GO:0061303 cornea development in camera-type eye	3	0.0101597	0.392	0.273	Biological Process	GO:0061303	cornea development in camera-type eye	0.0101597	0.114614	0	0	3	11
GO:0072173 metanephric tubule morphogenesis	3	0.0101597	0.392	0.273	Biological Process	GO:0072173	metanephric tubule morphogenesis	0.0101597	0.114614	0	0	3	11
GO:0098722 asymmetric stem cell division	3	0.0101597	0.392	0.273	Biological Process	GO:0098722	asymmetric stem cell division	0.0101597	0.114614	0	0	3	11
GO:0030111 regulation of Wnt signaling pathway	26	0.0102262	3.399	0.07	Biological Process	GO:0030111	regulation of Wnt signaling pathway	0.0102262	0.114614	0	0	26	370
GO:0001885 endothelial cell development	8	0.0102786	1.046	0.114	Biological Process	GO:0001885	endothelial cell development	0.0102786	0.114614	0	0	8	70
GO:0003208 cardiac ventricle morphogenesis	8	0.0102786	1.046	0.114	Biological Process	GO:0003208	cardiac ventricle morphogenesis	0.0102786	0.114614	0	0	8	70
GO:0009101 glycoprotein biosynthetic process	24	0.0102883	3.137	0.072	Biological Process	GO:0009101	glycoprotein biosynthetic process	0.0102883	0.114614	0	0	24	334
GO:1904029 regulation of cyclin-dependent protein kinase activity	10	0.0102926	1.307	0.101	Biological Process	GO:1904029	regulation of cyclin-dependent protein kinase activity	0.0102926	0.114614	0	0	10	99
GO:0034249 negative regulation of cellular amide metabolic process	14	0.0104723	1.83	0.086	Biological Process	GO:0034249	negative regulation of cellular amide metabolic process	0.0104723	0.114614	0	0	14	162
GO:0002025 norepinephrine-epinephrine-mediated vasodilation involved in regulation of systemic arterial blood pressure	2	0.0105113	0.261	0.5	Biological Process	GO:0002025	norepinephrine-epinephrine-mediated vasodilation involved in regulation of systemic arterial blood pressure	0.0105113	0.114614	0	0	2	4
GO:0002408 myeloid dendritic cell chemotaxis	2	0.0105113	0.261	0.5	Biological Process	GO:0002408	myeloid dendritic cell chemotaxis	0.0105113	0.114614	0	0	2	4
GO:0014901 satellite cell activation involved in skeletal muscle regeneration	2	0.0105113	0.261	0.5	Biological Process	GO:0014901	satellite cell activation involved in skeletal muscle regeneration	0.0105113	0.114614	0	0	2	4
GO:0021759 globus pallidus development	2	0.0105113	0.261	0.5	Biological Process	GO:0021759	globus pallidus development	0.0105113	0.114614	0	0	2	4
GO:0032345 negative regulation of aldosterone metabolic process	2	0.0105113	0.261	0.5	Biological Process	GO:0032345	negative regulation of aldosterone metabolic process	0.0105113	0.114614	0	0	2	4
GO:0032348 negative regulation of aldosterone biosynthetic process	2	0.0105113	0.261	0.5	Biological Process	GO:0032348	negative regulation of aldosterone biosynthetic process	0.0105113	0.114614	0	0	2	4
GO:0032474 otolith morphogenesis	2	0.0105113	0.261	0.5	Biological Process	GO:0032474	otolith morphogenesis	0.0105113	0.114614	0	0	2	4
GO:0038116 chemokine (C-C motif) ligand 21 signaling pathway	2	0.0105113	0.261	0.5	Biological Process	GO:0038116	chemokine (C-C motif) ligand 21 signaling pathway	0.0105113	0.114614	0	0	2	4
GO:0045636 positive regulation of melanocyte differentiation	2	0.0105113	0.261	0.5	Biological Process	GO:0045636	positive regulation of melanocyte differentiation	0.0105113	0.114614	0	0	2	4
GO:0046167 glycerol-3-phosphate biosynthetic process	2	0.0105113	0.261	0.5	Biological Process	GO:0046167	glycerol-3-phosphate biosynthetic process	0.0105113	0.114614	0	0	2	4
GO:0060979 vasculogenesis involved in coronary vascular morphogenesis	2	0.0105113	0.261	0.5	Biological Process	GO:0060979	vasculogenesis involved in coronary vascular morphogenesis	0.0105113	0.114614	0	0	2	4
GO:0072093 metanephric renal vesicle formation	2	0.0105113	0.261	0.5	Biological Process	GO:0072093	metanephric renal vesicle formation	0.0105113	0.114614	0	0	2	4
GO:1900127 positive regulation of hyaluronan biosynthetic process	2	0.0105113	0.261	0.5	Biological Process	GO:1900127	positive regulation of hyaluronan biosynthetic process	0.0105113	0.114614	0	0	2	4
GO:1900365 positive regulation of mRNA polyadenylation	2	0.0105113	0.261	0.5	Biological Process	GO:1900365	positive regulation of mRNA polyadenylation	0.0105113	0.114614	0	0	2	4
GO:1990910 response to hypobaric hypoxia	2	0.0105113	0.261	0.5	Biological Process	GO:1990910	response to hypobaric hypoxia	0.0105113	0.114614	0	0	2	4
GO:2000065 negative regulation of cortisol biosynthetic process	2	0.0105113	0.261	0.5	Biological Process	GO:2000065	negative regulation of cortisol biosynthetic process	0.0105113	0.114614	0	0	2	4
GO:0071407 cellular response to organic cyclic compound	36	0.0106646	4.706	0.065	Biological Process	GO:0071407	cellular response to organic cyclic compound	0.0106646	0.116105	0	0	36	558
GO:0051130 positive regulation of cellular component organization	75	0.0107268	9.804	0.056	Biological Process	GO:0051130	positive regulation of cellular component organization	0.0107268	0.116602	0	0	75	1335
GO:1904019 epithelial cell apoptotic process	11	0.0108449	1.438	0.096	Biological Process	GO:1904019	epithelial cell apoptotic process	0.0108449	0.116781	0	0	11	115
GO:2000142 regulation of DNA-templated transcription, initiation	9	0.0108697	1.176	0.106	Biological Process	GO:2000142	regulation of DNA-templated transcription, initiation	0.0108697	0.116781	0	0	9	85
GO:0007420 brain development	47	0.0109102	6.144	0.061	Biological Process	GO:0007420	brain development	0.0109102	0.116781	0	0	47	772
GO:0000186 activation of MAPKK activity	7	0.0109361	0.915	0.123	Biological Process	GO:0000186	activation of MAPKK activity	0.0109361	0.116781	0	0	7	57
GO:0006977 DNA damage response, signal transduction by p53 class mediator resulting in cell cycle arrest	7	0.0109361	0.915	0.123	Biological Process	GO:0006977	DNA damage response, signal transduction by p53 class mediator resulting in cell cycle arrest	0.0109361	0.116781	0	0	7	57
GO:0031102 neuron projection regeneration	7	0.0109361	0.915	0.123	Biological Process	GO:0031102	neuron projection regeneration	0.0109361	0.116781	0	0	7	57
GO:0043525 positive regulation of neuron apoptotic process	7	0.0109361	0.915	0.123	Biological Process	GO:0043525	positive regulation of neuron apoptotic process	0.0109361	0.116781	0	0	7	57
GO:0097345 mitochondrial outer membrane permeabilization	7	0.0109361	0.915	0.123	Biological Process	GO:0097345	mitochondrial outer membrane permeabilization	0.0109361	0.116781	0	0	7	57
GO:1902041 regulation of extrinsic apoptotic signaling pathway via death domain receptors	7	0.0109361	0.915	0.123	Biological Process	GO:1902041	regulation of extrinsic apoptotic signaling pathway via death domain receptors	0.0109361	0.116781	0	0	7	57
GO:0002521 leukocyte differentiation	36	0.0109452	4.706	0.064	Biological Process	GO:0002521	leukocyte differentiation	0.0109452	0.116781	0	0	36	559
GO:0043281 regulation of cysteine-type endopeptidase activity involved in apoptotic process	17	0.0109885	2.222	0.08	Biological Process	GO:0043281	regulation of cysteine-type endopeptidase activity involved in apoptotic process	0.0109885	0.116781	0	0	17	213
GO:0002832 negative regulation of response to biotic stimulus	6	0.0109948	0.784	0.136	Biological Process	GO:0002832	negative regulation of response to biotic stimulus	0.0109948	0.116781	0	0	6	44
GO:0010463 mesenchymal cell proliferation	6	0.0109948	0.784	0.136	Biological Process	GO:0010463	mesenchymal cell proliferation	0.0109948	0.116781	0	0	6	44
GO:2000772 regulation of cellular senescence	6	0.0109948	0.784	0.136	Biological Process	GO:2000772	regulation of cellular senescence	0.0109948	0.116781	0	0	6	44
GO:0042100 B cell proliferation	10	0.0110089	1.307	0.1	Biological Process	GO:0042100	B cell proliferation	0.0110089	0.116781	0	0	10	100
GO:1901989 positive regulation of cell cycle phase transition	10	0.0110089	1.307	0.1	Biological Process	GO:1901989	positive regulation of cell cycle phase transition	0.0110089	0.116781	0	0	10	100
GO:1905477 positive regulation of protein localization to membrane	12	0.0111039	1.569	0.092	Biological Process	GO:1905477	positive regulation of protein localization to membrane	0.0111039	0.117488	0	0	12	131
GO:0019827 stem cell population maintenance	13	0.0111424	1.699	0.088	Biological Process	GO:0019827	stem cell population maintenance	0.0111424	0.117488	0	0	13	147
GO:0048489 synaptic vesicle transport	13	0.0111424	1.699	0.088	Biological Process	GO:0048489	synaptic vesicle transport	0.0111424	0.117488	0	0	13	147
GO:0097480 establishment of synaptic vesicle localization	13	0.0111424	1.699	0.088	Biological Process	GO:0097480	establishment of synaptic vesicle localization	0.0111424	0.117488	0	0	13	147
GO:0090398 cellular senescence	8	0.0111594	1.046	0.113	Biological Process	GO:0090398	cellular senescence	0.0111594	0.117491	0	0	8	71
GO:0003338 metanephros morphogenesis	5	0.0112589	0.654	0.156	Biological Process	GO:0003338	metanephros morphogenesis	0.0112589	0.118008	0	0	5	32
GO:0010464 regulation of mesenchymal cell proliferation	5	0.0112589	0.654	0.156	Biological Process	GO:0010464	regulation of mesenchymal cell proliferation	0.0112589	0.118008	0	0	5	32
GO:0034694 response to prostaglandin	5	0.0112589	0.654	0.156	Biological Process	GO:0034694	response to prostaglandin	0.0112589	0.118008	0	0	5	32
GO:0000904 cell morphogenesis involved in differentiation	46	0.0113108	6.013	0.061	Biological Process	GO:0000904	cell morphogenesis involved in differentiation	0.0113108	0.118376	0	0	46	754
GO:0008356 asymmetric cell division	4	0.0114192	0.523	0.19	Biological Process	GO:0008356	asymmetric cell division	0.0114192	0.118901	0	0	4	21
GO:0017121 phospholipid scrambling	4	0.0114192	0.523	0.19	Biological Process	GO:0017121	phospholipid scrambling	0.0114192	0.118901	0	0	4	21
GO:1903392 negative regulation of adherens junction organization	4	0.0114192	0.523	0.19	Biological Process	GO:1903392	negative regulation of adherens junction organization	0.0114192	0.118901	0	0	4	21
GO:0007179 transforming growth factor beta receptor signaling pathway	16	0.0114469	2.092	0.081	Biological Process	GO:0007179	transforming growth factor beta receptor signaling pathway	0.0114469	0.118901	0	0	16	197
GO:0060341 regulation of cellular localization	56	0.0114589	7.32	0.059	Biological Process	GO:0060341	regulation of cellular localization	0.0114589	0.118901	0	0	56	953
GO:0006725 cellular aromatic compound metabolic process	298	0.0114624	38.954	0.048	Biological Process	GO:0006725	cellular aromatic compound metabolic process	0.0114624	0.118901	0	0	298	6215
GO:1901701 cellular response to oxygen-containing compound	66	0.0114815	8.627	0.057	Biological Process	GO:1901701	cellular response to oxygen-containing compound	0.0114815	0.118924	0	0	66	1155
GO:0046483 heterocycle metabolic process	296	0.0115955	38.693	0.048	Biological Process	GO:0046483	heterocycle metabolic process	0.0115955	0.119911	0	0	296	6171
GO:0071345 cellular response to cytokine stimulus	64	0.0116109	8.366	0.057	Biological Process	GO:0071345	cellular response to cytokine stimulus	0.0116109	0.119911	0	0	64	1115
GO:0071277 cellular response to calcium ion	9	0.0116908	1.176	0.105	Biological Process	GO:0071277	cellular response to calcium ion	0.0116908	0.120559	0	0	9	86
GO:0003007 heart morphogenesis	19	0.0117301	2.484	0.076	Biological Process	GO:0003007	heart morphogenesis	0.0117301	0.120788	0	0	19	249
GO:0021510 spinal cord development	10	0.0117624	1.307	0.099	Biological Process	GO:0021510	spinal cord development	0.0117624	0.120943	0	0	10	101
GO:0001658 branching involved in ureteric bud morphogenesis	7	0.0119879	0.915	0.121	Biological Process	GO:0001658	branching involved in ureteric bud morphogenesis	0.0119879	0.122367	0	0	7	58
GO:0016266 O-glycan processing	7	0.0119879	0.915	0.121	Biological Process	GO:0016266	O-glycan processing	0.0119879	0.122367	0	0	7	58
GO:0072431 signal transduction involved in mitotic G1 DNA damage checkpoint	7	0.0119879	0.915	0.121	Biological Process	GO:0072431	signal transduction involved in mitotic G1 DNA damage checkpoint	0.0119879	0.122367	0	0	7	58
GO:1902400 intracellular signal transduction involved in G1 DNA damage checkpoint	7	0.0119879	0.915	0.121	Biological Process	GO:1902400	intracellular signal transduction involved in G1 DNA damage checkpoint	0.0119879	0.122367	0	0	7	58
GO:2001244 positive regulation of intrinsic apoptotic signaling pathway	7	0.0119879	0.915	0.121	Biological Process	GO:2001244	positive regulation of intrinsic apoptotic signaling pathway	0.0119879	0.122367	0	0	7	58
GO:0007178 transmembrane receptor protein serine/threonine kinase signaling pathway	25	0.0121127	3.268	0.07	Biological Process	GO:0007178	transmembrane receptor protein serine/threonine kinase signaling pathway	0.0121127	0.123462	0	0	25	357
GO:0099537 trans-synaptic signaling	44	0.0121468	5.752	0.061	Biological Process	GO:0099537	trans-synaptic signaling	0.0121468	0.12363	0	0	44	718
GO:1900271 regulation of long-term synaptic potentiation	6	0.0122361	0.784	0.133	Biological Process	GO:1900271	regulation of long-term synaptic potentiation	0.0122361	0.124123	0	0	6	45
GO:2000107 negative regulation of leukocyte apoptotic process	6	0.0122361	0.784	0.133	Biological Process	GO:2000107	negative regulation of leukocyte apoptotic process	0.0122361	0.124123	0	0	6	45
GO:0043620 regulation of DNA-templated transcription in response to stress	11	0.0122482	1.438	0.094	Biological Process	GO:0043620	regulation of DNA-templated transcription in response to stress	0.0122482	0.124123	0	0	11	117
GO:0046328 regulation of JNK cascade	15	0.0124206	1.961	0.082	Biological Process	GO:0046328	regulation of JNK cascade	0.0124206	0.125552	0	0	15	182
GO:0009100 glycoprotein metabolic process	28	0.0124248	3.66	0.068	Biological Process	GO:0009100	glycoprotein metabolic process	0.0124248	0.125552	0	0	28	413
GO:0017157 regulation of exocytosis	17	0.0124998	2.222	0.079	Biological Process	GO:0017157	regulation of exocytosis	0.0124998	0.126128	0	0	17	216
GO:0032269 negative regulation of cellular protein metabolic process	61	0.0126689	7.974	0.058	Biological Process	GO:0032269	negative regulation of cellular protein metabolic process	0.0126689	0.127651	0	0	61	1059
GO:0009954 proximal/distal pattern formation	5	0.0128099	0.654	0.152	Biological Process	GO:0009954	proximal/distal pattern formation	0.0128099	0.128519	0	0	5	33
GO:0010165 response to X-ray	5	0.0128099	0.654	0.152	Biological Process	GO:0010165	response to X-ray	0.0128099	0.128519	0	0	5	33
GO:0072337 modified amino acid transport	5	0.0128099	0.654	0.152	Biological Process	GO:0072337	modified amino acid transport	0.0128099	0.128519	0	0	5	33
GO:0098727 maintenance of cell number	13	0.0130434	1.699	0.087	Biological Process	GO:0098727	maintenance of cell number	0.0130434	0.130085	0	0	13	150
GO:0002931 response to ischemia	7	0.0131108	0.915	0.119	Biological Process	GO:0002931	response to ischemia	0.0131108	0.130085	0	0	7	59
GO:1902402 signal transduction involved in mitotic DNA damage checkpoint	7	0.0131108	0.915	0.119	Biological Process	GO:1902402	signal transduction involved in mitotic DNA damage checkpoint	0.0131108	0.130085	0	0	7	59
GO:1902403 signal transduction involved in mitotic DNA integrity checkpoint	7	0.0131108	0.915	0.119	Biological Process	GO:1902403	signal transduction involved in mitotic DNA integrity checkpoint	0.0131108	0.130085	0	0	7	59
GO:0001821 histamine secretion	3	0.0131176	0.392	0.25	Biological Process	GO:0001821	histamine secretion	0.0131176	0.130085	0	0	3	12
GO:0038063 collagen-activated tyrosine kinase receptor signaling pathway	3	0.0131176	0.392	0.25	Biological Process	GO:0038063	collagen-activated tyrosine kinase receptor signaling pathway	0.0131176	0.130085	0	0	3	12
GO:0048791 calcium ion-regulated exocytosis of neurotransmitter	3	0.0131176	0.392	0.25	Biological Process	GO:0048791	calcium ion-regulated exocytosis of neurotransmitter	0.0131176	0.130085	0	0	3	12
GO:0061430 bone trabecula morphogenesis	3	0.0131176	0.392	0.25	Biological Process	GO:0061430	bone trabecula morphogenesis	0.0131176	0.130085	0	0	3	12
GO:0048870 cell motility	93	0.0131509	12.157	0.054	Biological Process	GO:0048870	cell motility	0.0131509	0.130085	0	0	93	1722
GO:0051674 localization of cell	93	0.0131509	12.157	0.054	Biological Process	GO:0051674	localization of cell	0.0131509	0.130085	0	0	93	1722
GO:1903827 regulation of cellular protein localization	36	0.0134156	4.706	0.063	Biological Process	GO:1903827	regulation of cellular protein localization	0.0134156	0.132517	0	0	36	567
GO:0016973 poly(A)+ mRNA export from nucleus	4	0.0134902	0.523	0.182	Biological Process	GO:0016973	poly(A)+ mRNA export from nucleus	0.0134902	0.13258	0	0	4	22
GO:0035970 peptidyl-threonine dephosphorylation	4	0.0134902	0.523	0.182	Biological Process	GO:0035970	peptidyl-threonine dephosphorylation	0.0134902	0.13258	0	0	4	22
GO:0060343 trabecula formation	4	0.0134902	0.523	0.182	Biological Process	GO:0060343	trabecula formation	0.0134902	0.13258	0	0	4	22
GO:0030857 negative regulation of epithelial cell differentiation	6	0.0135728	0.784	0.13	Biological Process	GO:0030857	negative regulation of epithelial cell differentiation	0.0135728	0.13258	0	0	6	46
GO:0034260 negative regulation of GTPase activity	6	0.0135728	0.784	0.13	Biological Process	GO:0034260	negative regulation of GTPase activity	0.0135728	0.13258	0	0	6	46
GO:0055010 ventricular cardiac muscle tissue morphogenesis	6	0.0135728	0.784	0.13	Biological Process	GO:0055010	ventricular cardiac muscle tissue morphogenesis	0.0135728	0.13258	0	0	6	46
GO:0060976 coronary vasculature development	6	0.0135728	0.784	0.13	Biological Process	GO:0060976	coronary vasculature development	0.0135728	0.13258	0	0	6	46
GO:1901028 regulation of mitochondrial outer membrane permeabilization involved in apoptotic signaling pathway	6	0.0135728	0.784	0.13	Biological Process	GO:1901028	regulation of mitochondrial outer membrane permeabilization involved in apoptotic signaling pathway	0.0135728	0.13258	0	0	6	46
GO:0071456 cellular response to hypoxia	16	0.0136679	2.092	0.08	Biological Process	GO:0071456	cellular response to hypoxia	0.0136679	0.133186	0	0	16	201
GO:0043933 protein-containing complex subunit organization	117	0.0136728	15.294	0.052	Biological Process	GO:0043933	protein-containing complex subunit organization	0.0136728	0.133186	0	0	117	2233
GO:0034332 adherens junction organization	13	0.0137296	1.699	0.086	Biological Process	GO:0034332	adherens junction organization	0.0137296	0.133555	0	0	13	151
GO:0072331 signal transduction by p53 class mediator	21	0.0139861	2.745	0.073	Biological Process	GO:0072331	signal transduction by p53 class mediator	0.0139861	0.135862	0	0	21	289
GO:0007165 signal transduction	297	0.0140842	38.824	0.048	Biological Process	GO:0007165	signal transduction	0.0140842	0.136626	0	0	297	6216
GO:2001259 positive regulation of cation channel activity	8	0.0141363	1.046	0.108	Biological Process	GO:2001259	positive regulation of cation channel activity	0.0141363	0.136943	0	0	8	74
GO:1902749 regulation of cell cycle G2/M phase transition	17	0.01417	2.222	0.078	Biological Process	GO:1902749	regulation of cell cycle G2/M phase transition	0.01417	0.137081	0	0	17	219
GO:0098660 inorganic ion transmembrane transport	50	0.0142261	6.536	0.059	Biological Process	GO:0098660	inorganic ion transmembrane transport	0.0142261	0.137434	0	0	50	844
GO:0045840 positive regulation of mitotic nuclear division	7	0.0143072	0.915	0.117	Biological Process	GO:0045840	positive regulation of mitotic nuclear division	0.0143072	0.138028	0	0	7	60
GO:0048661 positive regulation of smooth muscle cell proliferation	9	0.0144325	1.176	0.101	Biological Process	GO:0048661	positive regulation of smooth muscle cell proliferation	0.0144325	0.138769	0	0	9	89
GO:0051592 response to calcium ion	13	0.0144432	1.699	0.086	Biological Process	GO:0051592	response to calcium ion	0.0144432	0.138769	0	0	13	152
GO:1905039 carboxylic acid transmembrane transport	13	0.0144432	1.699	0.086	Biological Process	GO:1905039	carboxylic acid transmembrane transport	0.0144432	0.138769	0	0	13	152
GO:0030262 apoptotic nuclear changes	5	0.0144992	0.654	0.147	Biological Process	GO:0030262	apoptotic nuclear changes	0.0144992	0.138927	0	0	5	34
GO:0032148 activation of protein kinase B activity	5	0.0144992	0.654	0.147	Biological Process	GO:0032148	activation of protein kinase B activity	0.0144992	0.138927	0	0	5	34
GO:0032271 regulation of protein polymerization	18	0.0145375	2.353	0.076	Biological Process	GO:0032271	regulation of protein polymerization	0.0145375	0.139105	0	0	18	237
GO:0007610 behavior	37	0.0147017	4.837	0.063	Biological Process	GO:0007610	behavior	0.0147017	0.140485	0	0	37	590
GO:0070647 protein modification by small protein conjugation or removal	67	0.0147831	8.758	0.056	Biological Process	GO:0070647	protein modification by small protein conjugation or removal	0.0147831	0.141072	0	0	67	1190
GO:0010389 regulation of G2/M transition of mitotic cell cycle	16	0.0148975	2.092	0.079	Biological Process	GO:0010389	regulation of G2/M transition of mitotic cell cycle	0.0148975	0.141971	0	0	16	203
GO:0048483 autonomic nervous system development	6	0.0150082	0.784	0.128	Biological Process	GO:0048483	autonomic nervous system development	0.0150082	0.142831	0	0	6	47
GO:0034641 cellular nitrogen compound metabolic process	319	0.0150526	41.699	0.047	Biological Process	GO:0034641	cellular nitrogen compound metabolic process	0.0150526	0.143061	0	0	319	6724
GO:0044773 mitotic DNA damage checkpoint	10	0.0151709	1.307	0.095	Biological Process	GO:0044773	mitotic DNA damage checkpoint	0.0151709	0.14399	0	0	10	105
GO:0090092 regulation of transmembrane receptor protein serine/threonine kinase signaling pathway	19	0.0153547	2.484	0.074	Biological Process	GO:0090092	regulation of transmembrane receptor protein serine/threonine kinase signaling pathway	0.0153547	0.145538	0	0	19	256
GO:0043583 ear development	17	0.0153771	2.222	0.077	Biological Process	GO:0043583	ear development	0.0153771	0.145555	0	0	17	221
GO:0072175 epithelial tube formation	12	0.015438	1.569	0.088	Biological Process	GO:0072175	epithelial tube formation	0.015438	0.145935	0	0	12	137
GO:0010769 regulation of cell morphogenesis involved in differentiation	22	0.0155181	2.876	0.071	Biological Process	GO:0010769	regulation of cell morphogenesis involved in differentiation	0.0155181	0.146495	0	0	22	310
GO:0072413 signal transduction involved in mitotic cell cycle checkpoint	7	0.0155796	0.915	0.115	Biological Process	GO:0072413	signal transduction involved in mitotic cell cycle checkpoint	0.0155796	0.146849	0	0	7	61
GO:0007268 chemical synaptic transmission	43	0.015702	5.621	0.061	Biological Process	GO:0007268	chemical synaptic transmission	0.015702	0.146849	0	0	43	710
GO:0098916 anterograde trans-synaptic signaling	43	0.015702	5.621	0.061	Biological Process	GO:0098916	anterograde trans-synaptic signaling	0.015702	0.146849	0	0	43	710
GO:0003283 atrial septum development	4	0.0157853	0.523	0.174	Biological Process	GO:0003283	atrial septum development	0.0157853	0.146849	0	0	4	23
GO:0030539 male genitalia development	4	0.0157853	0.523	0.174	Biological Process	GO:0030539	male genitalia development	0.0157853	0.146849	0	0	4	23
GO:0042438 melanin biosynthetic process	4	0.0157853	0.523	0.174	Biological Process	GO:0042438	melanin biosynthetic process	0.0157853	0.146849	0	0	4	23
GO:0045649 regulation of macrophage differentiation	4	0.0157853	0.523	0.174	Biological Process	GO:0045649	regulation of macrophage differentiation	0.0157853	0.146849	0	0	4	23
GO:0071157 negative regulation of cell cycle arrest	4	0.0157853	0.523	0.174	Biological Process	GO:0071157	negative regulation of cell cycle arrest	0.0157853	0.146849	0	0	4	23
GO:0072170 metanephric tubule development	4	0.0157853	0.523	0.174	Biological Process	GO:0072170	metanephric tubule development	0.0157853	0.146849	0	0	4	23
GO:1900120 regulation of receptor binding	4	0.0157853	0.523	0.174	Biological Process	GO:1900120	regulation of receptor binding	0.0157853	0.146849	0	0	4	23
GO:1902993 positive regulation of amyloid precursor protein catabolic process	4	0.0157853	0.523	0.174	Biological Process	GO:1902993	positive regulation of amyloid precursor protein catabolic process	0.0157853	0.146849	0	0	4	23
GO:0017158 regulation of calcium ion-dependent exocytosis	10	0.0161273	1.307	0.094	Biological Process	GO:0017158	regulation of calcium ion-dependent exocytosis	0.0161273	0.149833	0	0	10	106
GO:0048167 regulation of synaptic plasticity	15	0.0162939	1.961	0.08	Biological Process	GO:0048167	regulation of synaptic plasticity	0.0162939	0.150981	0	0	15	188
GO:0120032 regulation of plasma membrane bounded cell projection assembly	15	0.0162939	1.961	0.08	Biological Process	GO:0120032	regulation of plasma membrane bounded cell projection assembly	0.0162939	0.150981	0	0	15	188
GO:0014909 smooth muscle cell migration	8	0.0164178	1.046	0.105	Biological Process	GO:0014909	smooth muscle cell migration	0.0164178	0.151431	0	0	8	76
GO:0007512 adult heart development	3	0.0165146	0.392	0.231	Biological Process	GO:0007512	adult heart development	0.0165146	0.151431	0	0	3	13
GO:0030213 hyaluronan biosynthetic process	3	0.0165146	0.392	0.231	Biological Process	GO:0030213	hyaluronan biosynthetic process	0.0165146	0.151431	0	0	3	13
GO:0031274 positive regulation of pseudopodium assembly	3	0.0165146	0.392	0.231	Biological Process	GO:0031274	positive regulation of pseudopodium assembly	0.0165146	0.151431	0	0	3	13
GO:0051451 myoblast migration	3	0.0165146	0.392	0.231	Biological Process	GO:0051451	myoblast migration	0.0165146	0.151431	0	0	3	13
GO:0070243 regulation of thymocyte apoptotic process	3	0.0165146	0.392	0.231	Biological Process	GO:0070243	regulation of thymocyte apoptotic process	0.0165146	0.151431	0	0	3	13
GO:0070486 leukocyte aggregation	3	0.0165146	0.392	0.231	Biological Process	GO:0070486	leukocyte aggregation	0.0165146	0.151431	0	0	3	13
GO:1901096 regulation of autophagosome maturation	3	0.0165146	0.392	0.231	Biological Process	GO:1901096	regulation of autophagosome maturation	0.0165146	0.151431	0	0	3	13
GO:0008038 neuron recognition	6	0.0165455	0.784	0.125	Biological Process	GO:0008038	neuron recognition	0.0165455	0.151516	0	0	6	48
GO:0006810 transport	247	0.0167329	32.288	0.048	Biological Process	GO:0006810	transport	0.0167329	0.151529	0	0	247	5108
GO:1903305 regulation of regulated secretory pathway	13	0.0167549	1.699	0.084	Biological Process	GO:1903305	regulation of regulated secretory pathway	0.0167549	0.151529	0	0	13	155
GO:0006398 mRNA 3'-end processing by stem-loop binding and cleavage	2	0.0170202	0.261	0.4	Biological Process	GO:0006398	mRNA 3'-end processing by stem-loop binding and cleavage	0.0170202	0.151529	0	0	2	5
GO:0010706 ganglioside biosynthetic process via lactosylceramide	2	0.0170202	0.261	0.4	Biological Process	GO:0010706	ganglioside biosynthetic process via lactosylceramide	0.0170202	0.151529	0	0	2	5
GO:0014042 positive regulation of neuron maturation	2	0.0170202	0.261	0.4	Biological Process	GO:0014042	positive regulation of neuron maturation	0.0170202	0.151529	0	0	2	5
GO:0015811 L-cystine transport	2	0.0170202	0.261	0.4	Biological Process	GO:0015811	L-cystine transport	0.0170202	0.151529	0	0	2	5
GO:0030222 eosinophil differentiation	2	0.0170202	0.261	0.4	Biological Process	GO:0030222	eosinophil differentiation	0.0170202	0.151529	0	0	2	5
GO:0031944 negative regulation of glucocorticoid metabolic process	2	0.0170202	0.261	0.4	Biological Process	GO:0031944	negative regulation of glucocorticoid metabolic process	0.0170202	0.151529	0	0	2	5
GO:0031947 negative regulation of glucocorticoid biosynthetic process	2	0.0170202	0.261	0.4	Biological Process	GO:0031947	negative regulation of glucocorticoid biosynthetic process	0.0170202	0.151529	0	0	2	5
GO:0042078 germ-line stem cell division	2	0.0170202	0.261	0.4	Biological Process	GO:0042078	germ-line stem cell division	0.0170202	0.151529	0	0	2	5
GO:0045634 regulation of melanocyte differentiation	2	0.0170202	0.261	0.4	Biological Process	GO:0045634	regulation of melanocyte differentiation	0.0170202	0.151529	0	0	2	5
GO:0046478 lactosylceramide metabolic process	2	0.0170202	0.261	0.4	Biological Process	GO:0046478	lactosylceramide metabolic process	0.0170202	0.151529	0	0	2	5
GO:0048752 semicircular canal morphogenesis	2	0.0170202	0.261	0.4	Biological Process	GO:0048752	semicircular canal morphogenesis	0.0170202	0.151529	0	0	2	5
GO:0060318 definitive erythrocyte differentiation	2	0.0170202	0.261	0.4	Biological Process	GO:0060318	definitive erythrocyte differentiation	0.0170202	0.151529	0	0	2	5
GO:0060633 negative regulation of transcription initiation from RNA polymerase II promoter	2	0.0170202	0.261	0.4	Biological Process	GO:0060633	negative regulation of transcription initiation from RNA polymerase II promoter	0.0170202	0.151529	0	0	2	5
GO:0060666 dichotomous subdivision of terminal units involved in salivary gland branching	2	0.0170202	0.261	0.4	Biological Process	GO:0060666	dichotomous subdivision of terminal units involved in salivary gland branching	0.0170202	0.151529	0	0	2	5
GO:0071650 negative regulation of chemokine (C-C motif) ligand 5 production	2	0.0170202	0.261	0.4	Biological Process	GO:0071650	negative regulation of chemokine (C-C motif) ligand 5 production	0.0170202	0.151529	0	0	2	5
GO:0090032 negative regulation of steroid hormone biosynthetic process	2	0.0170202	0.261	0.4	Biological Process	GO:0090032	negative regulation of steroid hormone biosynthetic process	0.0170202	0.151529	0	0	2	5
GO:0090261 positive regulation of inclusion body assembly	2	0.0170202	0.261	0.4	Biological Process	GO:0090261	positive regulation of inclusion body assembly	0.0170202	0.151529	0	0	2	5
GO:0098728 germline stem cell asymmetric division	2	0.0170202	0.261	0.4	Biological Process	GO:0098728	germline stem cell asymmetric division	0.0170202	0.151529	0	0	2	5
GO:2000436 positive regulation of protein neddylation	2	0.0170202	0.261	0.4	Biological Process	GO:2000436	positive regulation of protein neddylation	0.0170202	0.151529	0	0	2	5
GO:0034767 positive regulation of ion transmembrane transport	15	0.0170209	1.961	0.079	Biological Process	GO:0034767	positive regulation of ion transmembrane transport	0.0170209	0.151529	0	0	15	189
GO:0006024 glycosaminoglycan biosynthetic process	10	0.0171278	1.307	0.093	Biological Process	GO:0006024	glycosaminoglycan biosynthetic process	0.0171278	0.152096	0	0	10	107
GO:0015696 ammonium transport	10	0.0171278	1.307	0.093	Biological Process	GO:0015696	ammonium transport	0.0171278	0.152096	0	0	10	107
GO:0048534 hematopoietic or lymphoid organ development	56	0.0173588	7.32	0.057	Biological Process	GO:0048534	hematopoietic or lymphoid organ development	0.0173588	0.153953	0	0	56	975
GO:0043068 positive regulation of programmed cell death	40	0.0175144	5.229	0.061	Biological Process	GO:0043068	positive regulation of programmed cell death	0.0175144	0.155137	0	0	40	656
GO:0036293 response to decreased oxygen levels	25	0.0176124	3.268	0.068	Biological Process	GO:0036293	response to decreased oxygen levels	0.0176124	0.155696	0	0	25	369
GO:0070542 response to fatty acid	9	0.0176218	1.176	0.098	Biological Process	GO:0070542	response to fatty acid	0.0176218	0.155696	0	0	9	92
GO:0060491 regulation of cell projection assembly	15	0.0177725	1.961	0.079	Biological Process	GO:0060491	regulation of cell projection assembly	0.0177725	0.15683	0	0	15	190
GO:0001505 regulation of neurotransmitter levels	24	0.0178885	3.137	0.068	Biological Process	GO:0001505	regulation of neurotransmitter levels	0.0178885	0.157656	0	0	24	351
GO:0061564 axon development	33	0.0179442	4.314	0.063	Biological Process	GO:0061564	axon development	0.0179442	0.15795	0	0	33	521
GO:0045621 positive regulation of lymphocyte differentiation	10	0.0181734	1.307	0.093	Biological Process	GO:0045621	positive regulation of lymphocyte differentiation	0.0181734	0.159626	0	0	10	108
GO:0031103 axon regeneration	6	0.018188	0.784	0.122	Biological Process	GO:0031103	axon regeneration	0.018188	0.159626	0	0	6	49
GO:0017015 regulation of transforming growth factor beta receptor signaling pathway	11	0.0182645	1.438	0.089	Biological Process	GO:0017015	regulation of transforming growth factor beta receptor signaling pathway	0.0182645	0.159626	0	0	11	124
GO:0034505 tooth mineralization	4	0.0183113	0.523	0.167	Biological Process	GO:0034505	tooth mineralization	0.0183113	0.159626	0	0	4	24
GO:0006921 cellular component disassembly involved in execution phase of apoptosis	5	0.0183114	0.654	0.139	Biological Process	GO:0006921	cellular component disassembly involved in execution phase of apoptosis	0.0183114	0.159626	0	0	5	36
GO:0042092 type 2 immune response	5	0.0183114	0.654	0.139	Biological Process	GO:0042092	type 2 immune response	0.0183114	0.159626	0	0	5	36
GO:0070232 regulation of T cell apoptotic process	5	0.0183114	0.654	0.139	Biological Process	GO:0070232	regulation of T cell apoptotic process	0.0183114	0.159626	0	0	5	36
GO:0034097 response to cytokine	67	0.0183373	8.758	0.056	Biological Process	GO:0034097	response to cytokine	0.0183373	0.159626	0	0	67	1203
GO:0070059 intrinsic apoptotic signaling pathway in response to endoplasmic reticulum stress	7	0.0183616	0.915	0.111	Biological Process	GO:0070059	intrinsic apoptotic signaling pathway in response to endoplasmic reticulum stress	0.0183616	0.159626	0	0	7	63
GO:1902305 regulation of sodium ion transmembrane transport	7	0.0183616	0.915	0.111	Biological Process	GO:1902305	regulation of sodium ion transmembrane transport	0.0183616	0.159626	0	0	7	63
GO:0051649 establishment of localization in cell	117	0.0184004	15.294	0.052	Biological Process	GO:0051649	establishment of localization in cell	0.0184004	0.159765	0	0	117	2257
GO:0097479 synaptic vesicle localization	13	0.0184451	1.699	0.083	Biological Process	GO:0097479	synaptic vesicle localization	0.0184451	0.159956	0	0	13	157
GO:0051302 regulation of cell division	14	0.018597	1.83	0.08	Biological Process	GO:0051302	regulation of cell division	0.018597	0.160877	0	0	14	174
GO:1904064 positive regulation of cation transmembrane transport	14	0.018597	1.83	0.08	Biological Process	GO:1904064	positive regulation of cation transmembrane transport	0.018597	0.160877	0	0	14	174
GO:0061418 regulation of transcription from RNA polymerase II promoter in response to hypoxia	8	0.0189536	1.046	0.103	Biological Process	GO:0061418	regulation of transcription from RNA polymerase II promoter in response to hypoxia	0.0189536	0.16376	0	0	8	78
GO:0044774 mitotic DNA integrity checkpoint	10	0.0192652	1.307	0.092	Biological Process	GO:0044774	mitotic DNA integrity checkpoint	0.0192652	0.166144	0	0	10	109
GO:0010811 positive regulation of cell-substrate adhesion	11	0.0192767	1.438	0.088	Biological Process	GO:0010811	positive regulation of cell-substrate adhesion	0.0192767	0.166144	0	0	11	125
GO:0007519 skeletal muscle tissue development	13	0.0193369	1.699	0.082	Biological Process	GO:0007519	skeletal muscle tissue development	0.0193369	0.166458	0	0	13	158
GO:0019221 cytokine-mediated signaling pathway	47	0.0195426	6.144	0.059	Biological Process	GO:0019221	cytokine-mediated signaling pathway	0.0195426	0.168024	0	0	47	800
GO:0007548 sex differentiation	20	0.0197949	2.614	0.071	Biological Process	GO:0007548	sex differentiation	0.0197949	0.169985	0	0	20	281
GO:0048660 regulation of smooth muscle cell proliferation	12	0.0199392	1.569	0.085	Biological Process	GO:0048660	regulation of smooth muscle cell proliferation	0.0199392	0.170236	0	0	12	142
GO:0032501 multicellular organismal process	363	0.0199914	47.451	0.047	Biological Process	GO:0032501	multicellular organismal process	0.0199914	0.170236	0	0	363	7767
GO:0001708 cell fate specification	9	0.0200151	1.176	0.096	Biological Process	GO:0001708	cell fate specification	0.0200151	0.170236	0	0	9	94
GO:0045582 positive regulation of T cell differentiation	9	0.0200151	1.176	0.096	Biological Process	GO:0045582	positive regulation of T cell differentiation	0.0200151	0.170236	0	0	9	94
GO:0072080 nephron tubule development	9	0.0200151	1.176	0.096	Biological Process	GO:0072080	nephron tubule development	0.0200151	0.170236	0	0	9	94
GO:0051234 establishment of localization	253	0.0202946	33.072	0.048	Biological Process	GO:0051234	establishment of localization	0.0202946	0.170236	0	0	253	5265
GO:0031100 animal organ regeneration	8	0.0203211	1.046	0.101	Biological Process	GO:0031100	animal organ regeneration	0.0203211	0.170236	0	0	8	79
GO:0140029 exocytic process	8	0.0203211	1.046	0.101	Biological Process	GO:0140029	exocytic process	0.0203211	0.170236	0	0	8	79
GO:0018210 peptidyl-threonine modification	11	0.0203298	1.438	0.087	Biological Process	GO:0018210	peptidyl-threonine modification	0.0203298	0.170236	0	0	11	126
GO:0031647 regulation of protein stability	21	0.020356	2.745	0.07	Biological Process	GO:0031647	regulation of protein stability	0.020356	0.170236	0	0	21	300
GO:0001771 immunological synapse formation	3	0.0203567	0.392	0.214	Biological Process	GO:0001771	immunological synapse formation	0.0203567	0.170236	0	0	3	14
GO:0005513 detection of calcium ion	3	0.0203567	0.392	0.214	Biological Process	GO:0005513	detection of calcium ion	0.0203567	0.170236	0	0	3	14
GO:0006241 CTP biosynthetic process	3	0.0203567	0.392	0.214	Biological Process	GO:0006241	CTP biosynthetic process	0.0203567	0.170236	0	0	3	14
GO:0010561 negative regulation of glycoprotein biosynthetic process	3	0.0203567	0.392	0.214	Biological Process	GO:0010561	negative regulation of glycoprotein biosynthetic process	0.0203567	0.170236	0	0	3	14
GO:0018410 C-terminal protein amino acid modification	3	0.0203567	0.392	0.214	Biological Process	GO:0018410	C-terminal protein amino acid modification	0.0203567	0.170236	0	0	3	14
GO:0031115 negative regulation of microtubule polymerization	3	0.0203567	0.392	0.214	Biological Process	GO:0031115	negative regulation of microtubule polymerization	0.0203567	0.170236	0	0	3	14
GO:0031272 regulation of pseudopodium assembly	3	0.0203567	0.392	0.214	Biological Process	GO:0031272	regulation of pseudopodium assembly	0.0203567	0.170236	0	0	3	14
GO:0032725 positive regulation of granulocyte macrophage colony-stimulating factor production	3	0.0203567	0.392	0.214	Biological Process	GO:0032725	positive regulation of granulocyte macrophage colony-stimulating factor production	0.0203567	0.170236	0	0	3	14
GO:0045842 positive regulation of mitotic metaphase/anaphase transition	3	0.0203567	0.392	0.214	Biological Process	GO:0045842	positive regulation of mitotic metaphase/anaphase transition	0.0203567	0.170236	0	0	3	14
GO:0048681 negative regulation of axon regeneration	3	0.0203567	0.392	0.214	Biological Process	GO:0048681	negative regulation of axon regeneration	0.0203567	0.170236	0	0	3	14
GO:0060992 response to fungicide	3	0.0203567	0.392	0.214	Biological Process	GO:0060992	response to fungicide	0.0203567	0.170236	0	0	3	14
GO:1901970 positive regulation of mitotic sister chromatid separation	3	0.0203567	0.392	0.214	Biological Process	GO:1901970	positive regulation of mitotic sister chromatid separation	0.0203567	0.170236	0	0	3	14
GO:0032414 positive regulation of ion transmembrane transporter activity	10	0.0204044	1.307	0.091	Biological Process	GO:0032414	positive regulation of ion transmembrane transporter activity	0.0204044	0.170267	0	0	10	110
GO:0045892 negative regulation of transcription, DNA-templated	73	0.0204088	9.542	0.055	Biological Process	GO:0045892	negative regulation of transcription, DNA-templated	0.0204088	0.170267	0	0	73	1334
GO:0001953 negative regulation of cell-matrix adhesion	5	0.0204433	0.654	0.135	Biological Process	GO:0001953	negative regulation of cell-matrix adhesion	0.0204433	0.170353	0	0	5	37
GO:0018193 peptidyl-amino acid modification	71	0.0208992	9.281	0.055	Biological Process	GO:0018193	peptidyl-amino acid modification	0.0208992	0.173946	0	0	71	1294
GO:1903507 negative regulation of nucleic acid-templated transcription	73	0.0210369	9.542	0.055	Biological Process	GO:1903507	negative regulation of nucleic acid-templated transcription	0.0210369	0.173961	0	0	73	1336
GO:0006309 apoptotic DNA fragmentation	4	0.0210741	0.523	0.16	Biological Process	GO:0006309	apoptotic DNA fragmentation	0.0210741	0.173961	0	0	4	25
GO:0010738 regulation of protein kinase A signaling	4	0.0210741	0.523	0.16	Biological Process	GO:0010738	regulation of protein kinase A signaling	0.0210741	0.173961	0	0	4	25
GO:0034695 response to prostaglandin E	4	0.0210741	0.523	0.16	Biological Process	GO:0034695	response to prostaglandin E	0.0210741	0.173961	0	0	4	25
GO:0042104 positive regulation of activated T cell proliferation	4	0.0210741	0.523	0.16	Biological Process	GO:0042104	positive regulation of activated T cell proliferation	0.0210741	0.173961	0	0	4	25
GO:0051291 protein heterooligomerization	4	0.0210741	0.523	0.16	Biological Process	GO:0051291	protein heterooligomerization	0.0210741	0.173961	0	0	4	25
GO:0062009 secondary palate development	4	0.0210741	0.523	0.16	Biological Process	GO:0062009	secondary palate development	0.0210741	0.173961	0	0	4	25
GO:0001655 urogenital system development	23	0.0211668	3.007	0.068	Biological Process	GO:0001655	urogenital system development	0.0211668	0.174521	0	0	23	338
GO:0048704 embryonic skeletal system morphogenesis	9	0.021296	1.176	0.095	Biological Process	GO:0048704	embryonic skeletal system morphogenesis	0.021296	0.17538	0	0	9	95
GO:1903844 regulation of cellular response to transforming growth factor beta stimulus	11	0.0214248	1.438	0.087	Biological Process	GO:1903844	regulation of cellular response to transforming growth factor beta stimulus	0.0214248	0.176235	0	0	11	127
GO:0007585 respiratory gaseous exchange	7	0.0214749	0.915	0.108	Biological Process	GO:0007585	respiratory gaseous exchange	0.0214749	0.176235	0	0	7	65
GO:0060420 regulation of heart growth	7	0.0214749	0.915	0.108	Biological Process	GO:0060420	regulation of heart growth	0.0214749	0.176235	0	0	7	65
GO:1901360 organic cyclic compound metabolic process	305	0.0215327	39.869	0.047	Biological Process	GO:1901360	organic cyclic compound metabolic process	0.0215327	0.176503	0	0	305	6449
GO:0002520 immune system development	58	0.0215652	7.582	0.056	Biological Process	GO:0002520	immune system development	0.0215652	0.176563	0	0	58	1028
GO:1902679 negative regulation of RNA biosynthetic process	73	0.0216807	9.542	0.055	Biological Process	GO:1902679	negative regulation of RNA biosynthetic process	0.0216807	0.177303	0	0	73	1338
GO:0061028 establishment of endothelial barrier	6	0.0218004	0.784	0.118	Biological Process	GO:0061028	establishment of endothelial barrier	0.0218004	0.177797	0	0	6	51
GO:0048667 cell morphogenesis involved in neuron differentiation	37	0.0218158	4.837	0.061	Biological Process	GO:0048667	cell morphogenesis involved in neuron differentiation	0.0218158	0.177797	0	0	37	607
GO:0003002 regionalization	23	0.0218206	3.007	0.068	Biological Process	GO:0003002	regionalization	0.0218206	0.177797	0	0	23	339
GO:0042391 regulation of membrane potential	28	0.0218423	3.66	0.065	Biological Process	GO:0042391	regulation of membrane potential	0.0218423	0.177797	0	0	28	433
GO:1904062 regulation of cation transmembrane transport	25	0.0222623	3.268	0.066	Biological Process	GO:1904062	regulation of cation transmembrane transport	0.0222623	0.181006	0	0	25	377
GO:0001667 ameboidal-type cell migration	27	0.0224299	3.529	0.065	Biological Process	GO:0001667	ameboidal-type cell migration	0.0224299	0.182159	0	0	27	415
GO:0071214 cellular response to abiotic stimulus	23	0.02249	3.007	0.068	Biological Process	GO:0071214	cellular response to abiotic stimulus	0.02249	0.182226	0	0	23	340
GO:0104004 cellular response to environmental stimulus	23	0.02249	3.007	0.068	Biological Process	GO:0104004	cellular response to environmental stimulus	0.02249	0.182226	0	0	23	340
GO:0008285 negative regulation of cell proliferation	42	0.0228525	5.49	0.059	Biological Process	GO:0008285	negative regulation of cell proliferation	0.0228525	0.18495	0	0	42	708
GO:0040011 locomotion	102	0.0229196	13.333	0.052	Biological Process	GO:0040011	locomotion	0.0229196	0.185173	0	0	102	1954
GO:0044092 negative regulation of molecular function	64	0.0229327	8.366	0.055	Biological Process	GO:0044092	negative regulation of molecular function	0.0229327	0.185173	0	0	64	1155
GO:0048659 smooth muscle cell proliferation	12	0.0230714	1.569	0.083	Biological Process	GO:0048659	smooth muscle cell proliferation	0.0230714	0.18608	0	0	12	145
GO:0000271 polysaccharide biosynthetic process	8	0.0232637	1.046	0.099	Biological Process	GO:0000271	polysaccharide biosynthetic process	0.0232637	0.187416	0	0	8	81
GO:0009636 response to toxic substance	33	0.0234378	4.314	0.062	Biological Process	GO:0009636	response to toxic substance	0.0234378	0.188602	0	0	33	532
GO:0043065 positive regulation of apoptotic process	39	0.0235938	5.098	0.06	Biological Process	GO:0043065	positive regulation of apoptotic process	0.0235938	0.18964	0	0	39	650
GO:1903706 regulation of hemopoiesis	31	0.0238702	4.052	0.063	Biological Process	GO:1903706	regulation of hemopoiesis	0.0238702	0.191643	0	0	31	494
GO:0034333 adherens junction assembly	9	0.0240325	1.176	0.093	Biological Process	GO:0034333	adherens junction assembly	0.0240325	0.191786	0	0	9	97
GO:0051196 regulation of coenzyme metabolic process	9	0.0240325	1.176	0.093	Biological Process	GO:0051196	regulation of coenzyme metabolic process	0.0240325	0.191786	0	0	9	97
GO:0061326 renal tubule development	9	0.0240325	1.176	0.093	Biological Process	GO:0061326	renal tubule development	0.0240325	0.191786	0	0	9	97
GO:1901564 organonitrogen compound metabolic process	336	0.024053	43.922	0.047	Biological Process	GO:1901564	organonitrogen compound metabolic process	0.024053	0.191786	0	0	336	7171
GO:0032469 endoplasmic reticulum calcium ion homeostasis	4	0.0240789	0.523	0.154	Biological Process	GO:0032469	endoplasmic reticulum calcium ion homeostasis	0.0240789	0.191786	0	0	4	26
GO:0036010 protein localization to endosome	4	0.0240789	0.523	0.154	Biological Process	GO:0036010	protein localization to endosome	0.0240789	0.191786	0	0	4	26
GO:0060037 pharyngeal system development	4	0.0240789	0.523	0.154	Biological Process	GO:0060037	pharyngeal system development	0.0240789	0.191786	0	0	4	26
GO:1902105 regulation of leukocyte differentiation	20	0.0241757	2.614	0.07	Biological Process	GO:1902105	regulation of leukocyte differentiation	0.0241757	0.191928	0	0	20	287
GO:0006086 acetyl-CoA biosynthetic process from pyruvate	3	0.0246465	0.392	0.2	Biological Process	GO:0006086	acetyl-CoA biosynthetic process from pyruvate	0.0246465	0.191928	0	0	3	15
GO:0009209 pyrimidine ribonucleoside triphosphate biosynthetic process	3	0.0246465	0.392	0.2	Biological Process	GO:0009209	pyrimidine ribonucleoside triphosphate biosynthetic process	0.0246465	0.191928	0	0	3	15
GO:0038065 collagen-activated signaling pathway	3	0.0246465	0.392	0.2	Biological Process	GO:0038065	collagen-activated signaling pathway	0.0246465	0.191928	0	0	3	15
GO:0045064 T-helper 2 cell differentiation	3	0.0246465	0.392	0.2	Biological Process	GO:0045064	T-helper 2 cell differentiation	0.0246465	0.191928	0	0	3	15
GO:0048484 enteric nervous system development	3	0.0246465	0.392	0.2	Biological Process	GO:0048484	enteric nervous system development	0.0246465	0.191928	0	0	3	15
GO:0051608 histamine transport	3	0.0246465	0.392	0.2	Biological Process	GO:0051608	histamine transport	0.0246465	0.191928	0	0	3	15
GO:0060413 atrial septum morphogenesis	3	0.0246465	0.392	0.2	Biological Process	GO:0060413	atrial septum morphogenesis	0.0246465	0.191928	0	0	3	15
GO:0072224 metanephric glomerulus development	3	0.0246465	0.392	0.2	Biological Process	GO:0072224	metanephric glomerulus development	0.0246465	0.191928	0	0	3	15
GO:1902101 positive regulation of metaphase/anaphase transition of cell cycle	3	0.0246465	0.392	0.2	Biological Process	GO:1902101	positive regulation of metaphase/anaphase transition of cell cycle	0.0246465	0.191928	0	0	3	15
GO:1904424 regulation of GTP binding	3	0.0246465	0.392	0.2	Biological Process	GO:1904424	regulation of GTP binding	0.0246465	0.191928	0	0	3	15
GO:0010942 positive regulation of cell death	42	0.0247851	5.49	0.059	Biological Process	GO:0010942	positive regulation of cell death	0.0247851	0.191928	0	0	42	712
GO:0002326 B cell lineage commitment	2	0.0248063	0.261	0.333	Biological Process	GO:0002326	B cell lineage commitment	0.0248063	0.191928	0	0	2	6
GO:0007185 transmembrane receptor protein tyrosine phosphatase signaling pathway	2	0.0248063	0.261	0.333	Biological Process	GO:0007185	transmembrane receptor protein tyrosine phosphatase signaling pathway	0.0248063	0.191928	0	0	2	6
GO:0009637 response to blue light	2	0.0248063	0.261	0.333	Biological Process	GO:0009637	response to blue light	0.0248063	0.191928	0	0	2	6
GO:0046666 retinal cell programmed cell death	2	0.0248063	0.261	0.333	Biological Process	GO:0046666	retinal cell programmed cell death	0.0248063	0.191928	0	0	2	6
GO:0060137 maternal process involved in parturition	2	0.0248063	0.261	0.333	Biological Process	GO:0060137	maternal process involved in parturition	0.0248063	0.191928	0	0	2	6
GO:0072143 mesangial cell development	2	0.0248063	0.261	0.333	Biological Process	GO:0072143	mesangial cell development	0.0248063	0.191928	0	0	2	6
GO:0072174 metanephric tubule formation	2	0.0248063	0.261	0.333	Biological Process	GO:0072174	metanephric tubule formation	0.0248063	0.191928	0	0	2	6
GO:1901098 positive regulation of autophagosome maturation	2	0.0248063	0.261	0.333	Biological Process	GO:1901098	positive regulation of autophagosome maturation	0.0248063	0.191928	0	0	2	6
GO:1901552 positive regulation of endothelial cell development	2	0.0248063	0.261	0.333	Biological Process	GO:1901552	positive regulation of endothelial cell development	0.0248063	0.191928	0	0	2	6
GO:1902231 positive regulation of intrinsic apoptotic signaling pathway in response to DNA damage	2	0.0248063	0.261	0.333	Biological Process	GO:1902231	positive regulation of intrinsic apoptotic signaling pathway in response to DNA damage	0.0248063	0.191928	0	0	2	6
GO:1903142 positive regulation of establishment of endothelial barrier	2	0.0248063	0.261	0.333	Biological Process	GO:1903142	positive regulation of establishment of endothelial barrier	0.0248063	0.191928	0	0	2	6
GO:2000143 negative regulation of DNA-templated transcription, initiation	2	0.0248063	0.261	0.333	Biological Process	GO:2000143	negative regulation of DNA-templated transcription, initiation	0.0248063	0.191928	0	0	2	6
GO:2000669 negative regulation of dendritic cell apoptotic process	2	0.0248063	0.261	0.333	Biological Process	GO:2000669	negative regulation of dendritic cell apoptotic process	0.0248063	0.191928	0	0	2	6
GO:2000675 negative regulation of type B pancreatic cell apoptotic process	2	0.0248063	0.261	0.333	Biological Process	GO:2000675	negative regulation of type B pancreatic cell apoptotic process	0.0248063	0.191928	0	0	2	6
GO:0030512 negative regulation of transforming growth factor beta receptor signaling pathway	8	0.024842	1.046	0.098	Biological Process	GO:0030512	negative regulation of transforming growth factor beta receptor signaling pathway	0.024842	0.191993	0	0	8	82
GO:0060415 muscle tissue morphogenesis	7	0.0249365	0.915	0.104	Biological Process	GO:0060415	muscle tissue morphogenesis	0.0249365	0.192369	0	0	7	67
GO:1901698 response to nitrogen compound	62	0.024957	8.105	0.055	Biological Process	GO:1901698	response to nitrogen compound	0.024957	0.192369	0	0	62	1119
GO:0010976 positive regulation of neuron projection development	20	0.0249726	2.614	0.069	Biological Process	GO:0010976	positive regulation of neuron projection development	0.0249726	0.192369	0	0	20	288
GO:0007369 gastrulation	14	0.0251536	1.83	0.077	Biological Process	GO:0007369	gastrulation	0.0251536	0.192974	0	0	14	181
GO:0010737 protein kinase A signaling	5	0.025178	0.654	0.128	Biological Process	GO:0010737	protein kinase A signaling	0.025178	0.192974	0	0	5	39
GO:0043029 T cell homeostasis	5	0.025178	0.654	0.128	Biological Process	GO:0043029	T cell homeostasis	0.025178	0.192974	0	0	5	39
GO:0045022 early endosome to late endosome transport	5	0.025178	0.654	0.128	Biological Process	GO:0045022	early endosome to late endosome transport	0.025178	0.192974	0	0	5	39
GO:0051091 positive regulation of DNA-binding transcription factor activity	19	0.0251884	2.484	0.07	Biological Process	GO:0051091	positive regulation of DNA-binding transcription factor activity	0.0251884	0.192974	0	0	19	270
GO:0044057 regulation of system process	36	0.02528	4.706	0.061	Biological Process	GO:0044057	regulation of system process	0.02528	0.193465	0	0	36	594
GO:0006023 aminoglycan biosynthetic process	10	0.0254552	1.307	0.088	Biological Process	GO:0006023	aminoglycan biosynthetic process	0.0254552	0.194594	0	0	10	114
GO:0046928 regulation of neurotransmitter secretion	9	0.0254907	1.176	0.092	Biological Process	GO:0046928	regulation of neurotransmitter secretion	0.0254907	0.194623	0	0	9	98
GO:0042692 muscle cell differentiation	24	0.0255143	3.137	0.066	Biological Process	GO:0042692	muscle cell differentiation	0.0255143	0.194623	0	0	24	363
GO:0051716 cellular response to stimulus	357	0.0255528	46.667	0.047	Biological Process	GO:0051716	cellular response to stimulus	0.0255528	0.194705	0	0	357	7661
GO:0001503 ossification	26	0.0256583	3.399	0.065	Biological Process	GO:0001503	ossification	0.0256583	0.195086	0	0	26	401
GO:0050673 epithelial cell proliferation	26	0.0256583	3.399	0.065	Biological Process	GO:0050673	epithelial cell proliferation	0.0256583	0.195086	0	0	26	401
GO:0009894 regulation of catabolic process	59	0.0257061	7.712	0.056	Biological Process	GO:0009894	regulation of catabolic process	0.0257061	0.195238	0	0	59	1059
GO:0097366 response to bronchodilator	6	0.0258679	0.784	0.113	Biological Process	GO:0097366	response to bronchodilator	0.0258679	0.196044	0	0	6	53
GO:2000649 regulation of sodium ion transmembrane transporter activity	6	0.0258679	0.784	0.113	Biological Process	GO:2000649	regulation of sodium ion transmembrane transporter activity	0.0258679	0.196044	0	0	6	53
GO:0030177 positive regulation of Wnt signaling pathway	14	0.0262147	1.83	0.077	Biological Process	GO:0030177	positive regulation of Wnt signaling pathway	0.0262147	0.198245	0	0	14	182
GO:0050770 regulation of axonogenesis	14	0.0262147	1.83	0.077	Biological Process	GO:0050770	regulation of axonogenesis	0.0262147	0.198245	0	0	14	182
GO:0051650 establishment of vesicle localization	21	0.0262556	2.745	0.068	Biological Process	GO:0051650	establishment of vesicle localization	0.0262556	0.198341	0	0	21	308
GO:0016567 protein ubiquitination	51	0.026481	6.667	0.057	Biological Process	GO:0016567	protein ubiquitination	0.026481	0.19971	0	0	51	897
GO:0010507 negative regulation of autophagy	8	0.0264936	1.046	0.096	Biological Process	GO:0010507	negative regulation of autophagy	0.0264936	0.19971	0	0	8	83
GO:0014910 regulation of smooth muscle cell migration	7	0.0268028	0.915	0.103	Biological Process	GO:0014910	regulation of smooth muscle cell migration	0.0268028	0.201825	0	0	7	68
GO:0032006 regulation of TOR signaling	9	0.0270106	1.176	0.091	Biological Process	GO:0032006	regulation of TOR signaling	0.0270106	0.203171	0	0	9	99
GO:0007064 mitotic sister chromatid cohesion	4	0.0273297	0.523	0.148	Biological Process	GO:0007064	mitotic sister chromatid cohesion	0.0273297	0.204261	0	0	4	27
GO:0010971 positive regulation of G2/M transition of mitotic cell cycle	4	0.0273297	0.523	0.148	Biological Process	GO:0010971	positive regulation of G2/M transition of mitotic cell cycle	0.0273297	0.204261	0	0	4	27
GO:0035116 embryonic hindlimb morphogenesis	4	0.0273297	0.523	0.148	Biological Process	GO:0035116	embryonic hindlimb morphogenesis	0.0273297	0.204261	0	0	4	27
GO:0048679 regulation of axon regeneration	4	0.0273297	0.523	0.148	Biological Process	GO:0048679	regulation of axon regeneration	0.0273297	0.204261	0	0	4	27
GO:0072207 metanephric epithelium development	4	0.0273297	0.523	0.148	Biological Process	GO:0072207	metanephric epithelium development	0.0273297	0.204261	0	0	4	27
GO:1905209 positive regulation of cardiocyte differentiation	4	0.0273297	0.523	0.148	Biological Process	GO:1905209	positive regulation of cardiocyte differentiation	0.0273297	0.204261	0	0	4	27
GO:0009416 response to light stimulus	22	0.0274059	2.876	0.067	Biological Process	GO:0009416	response to light stimulus	0.0274059	0.204613	0	0	22	328
GO:0046651 lymphocyte proliferation	20	0.0274839	2.614	0.069	Biological Process	GO:0046651	lymphocyte proliferation	0.0274839	0.204978	0	0	20	291
GO:0001508 action potential	11	0.0275576	1.438	0.083	Biological Process	GO:0001508	action potential	0.0275576	0.20531	0	0	11	132
GO:0034248 regulation of cellular amide metabolic process	28	0.0275872	3.66	0.063	Biological Process	GO:0034248	regulation of cellular amide metabolic process	0.0275872	0.205313	0	0	28	442
GO:0046661 male sex differentiation	13	0.0276788	1.699	0.078	Biological Process	GO:0046661	male sex differentiation	0.0276788	0.205756	0	0	13	166
GO:0014911 positive regulation of smooth muscle cell migration	5	0.0277876	0.654	0.125	Biological Process	GO:0014911	positive regulation of smooth muscle cell migration	0.0277876	0.205756	0	0	5	40
GO:0032467 positive regulation of cytokinesis	5	0.0277876	0.654	0.125	Biological Process	GO:0032467	positive regulation of cytokinesis	0.0277876	0.205756	0	0	5	40
GO:0071526 semaphorin-plexin signaling pathway	5	0.0277876	0.654	0.125	Biological Process	GO:0071526	semaphorin-plexin signaling pathway	0.0277876	0.205756	0	0	5	40
GO:0090263 positive regulation of canonical Wnt signaling pathway	12	0.027793	1.569	0.081	Biological Process	GO:0090263	positive regulation of canonical Wnt signaling pathway	0.027793	0.205756	0	0	12	149
GO:0010243 response to organonitrogen compound	57	0.0279705	7.451	0.056	Biological Process	GO:0010243	response to organonitrogen compound	0.0279705	0.206852	0	0	57	1023
GO:0035384 thioester biosynthetic process	6	0.0280787	0.784	0.111	Biological Process	GO:0035384	thioester biosynthetic process	0.0280787	0.207216	0	0	6	54
GO:0071616 acyl-CoA biosynthetic process	6	0.0280787	0.784	0.111	Biological Process	GO:0071616	acyl-CoA biosynthetic process	0.0280787	0.207216	0	0	6	54
GO:2000116 regulation of cysteine-type endopeptidase activity	17	0.0281281	2.222	0.072	Biological Process	GO:2000116	regulation of cysteine-type endopeptidase activity	0.0281281	0.207364	0	0	17	237
GO:1903510 mucopolysaccharide metabolic process	10	0.0282916	1.307	0.086	Biological Process	GO:1903510	mucopolysaccharide metabolic process	0.0282916	0.208351	0	0	10	116
GO:0032091 negative regulation of protein binding	9	0.0285931	1.176	0.09	Biological Process	GO:0032091	negative regulation of protein binding	0.0285931	0.210131	0	0	9	100
GO:1903035 negative regulation of response to wounding	9	0.0285931	1.176	0.09	Biological Process	GO:1903035	negative regulation of response to wounding	0.0285931	0.210131	0	0	9	100
GO:0071230 cellular response to amino acid stimulus	7	0.028762	0.915	0.101	Biological Process	GO:0071230	cellular response to amino acid stimulus	0.028762	0.210665	0	0	7	69
GO:0071300 cellular response to retinoic acid	7	0.028762	0.915	0.101	Biological Process	GO:0071300	cellular response to retinoic acid	0.028762	0.210665	0	0	7	69
GO:0099072 regulation of postsynaptic membrane neurotransmitter receptor levels	7	0.028762	0.915	0.101	Biological Process	GO:0099072	regulation of postsynaptic membrane neurotransmitter receptor levels	0.028762	0.210665	0	0	7	69
GO:0009314 response to radiation	29	0.0287911	3.791	0.063	Biological Process	GO:0009314	response to radiation	0.0287911	0.210665	0	0	29	463
GO:0098662 inorganic cation transmembrane transport	45	0.0288155	5.882	0.058	Biological Process	GO:0098662	inorganic cation transmembrane transport	0.0288155	0.210665	0	0	45	780
GO:1905475 regulation of protein localization to membrane	15	0.0288931	1.961	0.074	Biological Process	GO:1905475	regulation of protein localization to membrane	0.0288931	0.211002	0	0	15	202
GO:0035270 endocrine system development	11	0.0289217	1.438	0.083	Biological Process	GO:0035270	endocrine system development	0.0289217	0.211002	0	0	11	133
GO:0001837 epithelial to mesenchymal transition	12	0.0290756	1.569	0.08	Biological Process	GO:0001837	epithelial to mesenchymal transition	0.0290756	0.211519	0	0	12	150
GO:0035148 tube formation	12	0.0290756	1.569	0.08	Biological Process	GO:0035148	tube formation	0.0290756	0.211519	0	0	12	150
GO:0021535 cell migration in hindbrain	3	0.0293835	0.392	0.188	Biological Process	GO:0021535	cell migration in hindbrain	0.0293835	0.211519	0	0	3	16
GO:0031269 pseudopodium assembly	3	0.0293835	0.392	0.188	Biological Process	GO:0031269	pseudopodium assembly	0.0293835	0.211519	0	0	3	16
GO:0032604 granulocyte macrophage colony-stimulating factor production	3	0.0293835	0.392	0.188	Biological Process	GO:0032604	granulocyte macrophage colony-stimulating factor production	0.0293835	0.211519	0	0	3	16
GO:0032645 regulation of granulocyte macrophage colony-stimulating factor production	3	0.0293835	0.392	0.188	Biological Process	GO:0032645	regulation of granulocyte macrophage colony-stimulating factor production	0.0293835	0.211519	0	0	3	16
GO:0034349 glial cell apoptotic process	3	0.0293835	0.392	0.188	Biological Process	GO:0034349	glial cell apoptotic process	0.0293835	0.211519	0	0	3	16
GO:0046036 CTP metabolic process	3	0.0293835	0.392	0.188	Biological Process	GO:0046036	CTP metabolic process	0.0293835	0.211519	0	0	3	16
GO:0061298 retina vasculature development in camera-type eye	3	0.0293835	0.392	0.188	Biological Process	GO:0061298	retina vasculature development in camera-type eye	0.0293835	0.211519	0	0	3	16
GO:0070571 negative regulation of neuron projection regeneration	3	0.0293835	0.392	0.188	Biological Process	GO:0070571	negative regulation of neuron projection regeneration	0.0293835	0.211519	0	0	3	16
GO:0071732 cellular response to nitric oxide	3	0.0293835	0.392	0.188	Biological Process	GO:0071732	cellular response to nitric oxide	0.0293835	0.211519	0	0	3	16
GO:0072283 metanephric renal vesicle morphogenesis	3	0.0293835	0.392	0.188	Biological Process	GO:0072283	metanephric renal vesicle morphogenesis	0.0293835	0.211519	0	0	3	16
GO:0090399 replicative senescence	3	0.0293835	0.392	0.188	Biological Process	GO:0090399	replicative senescence	0.0293835	0.211519	0	0	3	16
GO:0043087 regulation of GTPase activity	30	0.0299287	3.922	0.062	Biological Process	GO:0043087	regulation of GTPase activity	0.0299287	0.215224	0	0	30	484
GO:0015931 nucleobase-containing compound transport	18	0.0299747	2.353	0.07	Biological Process	GO:0015931	nucleobase-containing compound transport	0.0299747	0.215239	0	0	18	257
GO:0043506 regulation of JUN kinase activity	8	0.0300227	1.046	0.094	Biological Process	GO:0043506	regulation of JUN kinase activity	0.0300227	0.215239	0	0	8	85
GO:1903845 negative regulation of cellular response to transforming growth factor beta stimulus	8	0.0300227	1.046	0.094	Biological Process	GO:1903845	negative regulation of cellular response to transforming growth factor beta stimulus	0.0300227	0.215239	0	0	8	85
GO:0032943 mononuclear cell proliferation	20	0.0301819	2.614	0.068	Biological Process	GO:0032943	mononuclear cell proliferation	0.0301819	0.21616	0	0	20	294
GO:0051028 mRNA transport	12	0.0304004	1.569	0.079	Biological Process	GO:0051028	mRNA transport	0.0304004	0.217354	0	0	12	151
GO:0090183 regulation of kidney development	6	0.0304105	0.784	0.109	Biological Process	GO:0090183	regulation of kidney development	0.0304105	0.217354	0	0	6	55
GO:0007190 activation of adenylate cyclase activity	5	0.0305628	0.654	0.122	Biological Process	GO:0007190	activation of adenylate cyclase activity	0.0305628	0.217779	0	0	5	41
GO:0019048 modulation by virus of host morphology or physiology	5	0.0305628	0.654	0.122	Biological Process	GO:0019048	modulation by virus of host morphology or physiology	0.0305628	0.217779	0	0	5	41
GO:0046006 regulation of activated T cell proliferation	5	0.0305628	0.654	0.122	Biological Process	GO:0046006	regulation of activated T cell proliferation	0.0305628	0.217779	0	0	5	41
GO:0051146 striated muscle cell differentiation	19	0.0306314	2.484	0.069	Biological Process	GO:0051146	striated muscle cell differentiation	0.0306314	0.218047	0	0	19	276
GO:0018146 keratan sulfate biosynthetic process	4	0.0308297	0.523	0.143	Biological Process	GO:0018146	keratan sulfate biosynthetic process	0.0308297	0.218795	0	0	4	28
GO:0031440 regulation of mRNA 3'-end processing	4	0.0308297	0.523	0.143	Biological Process	GO:0031440	regulation of mRNA 3'-end processing	0.0308297	0.218795	0	0	4	28
GO:2000637 positive regulation of gene silencing by miRNA	4	0.0308297	0.523	0.143	Biological Process	GO:2000637	positive regulation of gene silencing by miRNA	0.0308297	0.218795	0	0	4	28
GO:0048562 embryonic organ morphogenesis	20	0.0311239	2.614	0.068	Biological Process	GO:0048562	embryonic organ morphogenesis	0.0311239	0.22066	0	0	20	295
GO:0005976 polysaccharide metabolic process	10	0.0313457	1.307	0.085	Biological Process	GO:0005976	polysaccharide metabolic process	0.0313457	0.221562	0	0	10	118
GO:0007613 memory	10	0.0313457	1.307	0.085	Biological Process	GO:0007613	memory	0.0313457	0.221562	0	0	10	118
GO:0042471 ear morphogenesis	10	0.0313457	1.307	0.085	Biological Process	GO:0042471	ear morphogenesis	0.0313457	0.221562	0	0	10	118
GO:0060538 skeletal muscle organ development	13	0.0314018	1.699	0.077	Biological Process	GO:0060538	skeletal muscle organ development	0.0314018	0.221736	0	0	13	169
GO:0034765 regulation of ion transmembrane transport	31	0.031724	4.052	0.061	Biological Process	GO:0034765	regulation of ion transmembrane transport	0.031724	0.223786	0	0	31	506
GO:0051588 regulation of neurotransmitter transport	11	0.0317939	1.438	0.081	Biological Process	GO:0051588	regulation of neurotransmitter transport	0.0317939	0.224054	0	0	11	135
GO:0002028 regulation of sodium ion transport	8	0.0319029	1.046	0.093	Biological Process	GO:0002028	regulation of sodium ion transport	0.0319029	0.224149	0	0	8	86
GO:0007045 cell-substrate adherens junction assembly	8	0.0319029	1.046	0.093	Biological Process	GO:0007045	cell-substrate adherens junction assembly	0.0319029	0.224149	0	0	8	86
GO:0048041 focal adhesion assembly	8	0.0319029	1.046	0.093	Biological Process	GO:0048041	focal adhesion assembly	0.0319029	0.224149	0	0	8	86
GO:0030838 positive regulation of actin filament polymerization	9	0.0319511	1.176	0.088	Biological Process	GO:0030838	positive regulation of actin filament polymerization	0.0319511	0.224264	0	0	9	102
GO:0043270 positive regulation of ion transport	21	0.0324145	2.745	0.067	Biological Process	GO:0043270	positive regulation of ion transport	0.0324145	0.227289	0	0	21	315
GO:0098655 cation transmembrane transport	51	0.0325973	6.667	0.056	Biological Process	GO:0098655	cation transmembrane transport	0.0325973	0.228	0	0	51	909
GO:0015698 inorganic anion transport	13	0.0327198	1.699	0.076	Biological Process	GO:0015698	inorganic anion transport	0.0327198	0.228	0	0	13	170
GO:0007155 cell adhesion	78	0.0327529	10.196	0.053	Biological Process	GO:0007155	cell adhesion	0.0327529	0.228	0	0	78	1472
GO:0032411 positive regulation of transporter activity	10	0.0329568	1.307	0.084	Biological Process	GO:0032411	positive regulation of transporter activity	0.0329568	0.228	0	0	10	119
GO:0051224 negative regulation of protein transport	10	0.0329568	1.307	0.084	Biological Process	GO:0051224	negative regulation of protein transport	0.0329568	0.228	0	0	10	119
GO:1902117 positive regulation of organelle assembly	7	0.0329656	0.915	0.099	Biological Process	GO:1902117	positive regulation of organelle assembly	0.0329656	0.228	0	0	7	71
GO:0043280 positive regulation of cysteine-type endopeptidase activity involved in apoptotic process	11	0.0333035	1.438	0.081	Biological Process	GO:0043280	positive regulation of cysteine-type endopeptidase activity involved in apoptotic process	0.0333035	0.228	0	0	11	136
GO:0046907 intracellular transport	95	0.0333232	12.418	0.052	Biological Process	GO:0046907	intracellular transport	0.0333232	0.228	0	0	95	1835
GO:0098927 vesicle-mediated transport between endosomal compartments	5	0.0335059	0.654	0.119	Biological Process	GO:0098927	vesicle-mediated transport between endosomal compartments	0.0335059	0.228	0	0	5	42
GO:2000279 negative regulation of DNA biosynthetic process	5	0.0335059	0.654	0.119	Biological Process	GO:2000279	negative regulation of DNA biosynthetic process	0.0335059	0.228	0	0	5	42
GO:0022898 regulation of transmembrane transporter activity	19	0.0336619	2.484	0.068	Biological Process	GO:0022898	regulation of transmembrane transporter activity	0.0336619	0.228	0	0	19	279
GO:0015672 monovalent inorganic cation transport	33	0.0336932	4.314	0.06	Biological Process	GO:0015672	monovalent inorganic cation transport	0.0336932	0.228	0	0	33	548
GO:0001866 NK T cell proliferation	2	0.0337477	0.261	0.286	Biological Process	GO:0001866	NK T cell proliferation	0.0337477	0.228	0	0	2	7
GO:0002606 positive regulation of dendritic cell antigen processing and presentation	2	0.0337477	0.261	0.286	Biological Process	GO:0002606	positive regulation of dendritic cell antigen processing and presentation	0.0337477	0.228	0	0	2	7
GO:0003360 brainstem development	2	0.0337477	0.261	0.286	Biological Process	GO:0003360	brainstem development	0.0337477	0.228	0	0	2	7
GO:0014719 skeletal muscle satellite cell activation	2	0.0337477	0.261	0.286	Biological Process	GO:0014719	skeletal muscle satellite cell activation	0.0337477	0.228	0	0	2	7
GO:0014883 transition between fast and slow fiber	2	0.0337477	0.261	0.286	Biological Process	GO:0014883	transition between fast and slow fiber	0.0337477	0.228	0	0	2	7
GO:0015871 choline transport	2	0.0337477	0.261	0.286	Biological Process	GO:0015871	choline transport	0.0337477	0.228	0	0	2	7
GO:0017182 peptidyl-diphthamide metabolic process	2	0.0337477	0.261	0.286	Biological Process	GO:0017182	peptidyl-diphthamide metabolic process	0.0337477	0.228	0	0	2	7
GO:0017183 peptidyl-diphthamide biosynthetic process from peptidyl-histidine	2	0.0337477	0.261	0.286	Biological Process	GO:0017183	peptidyl-diphthamide biosynthetic process from peptidyl-histidine	0.0337477	0.228	0	0	2	7
GO:0017196 N-terminal peptidyl-methionine acetylation	2	0.0337477	0.261	0.286	Biological Process	GO:0017196	N-terminal peptidyl-methionine acetylation	0.0337477	0.228	0	0	2	7
GO:0019563 glycerol catabolic process	2	0.0337477	0.261	0.286	Biological Process	GO:0019563	glycerol catabolic process	0.0337477	0.228	0	0	2	7
GO:0021910 smoothened signaling pathway involved in ventral spinal cord patterning	2	0.0337477	0.261	0.286	Biological Process	GO:0021910	smoothened signaling pathway involved in ventral spinal cord patterning	0.0337477	0.228	0	0	2	7
GO:0032344 regulation of aldosterone metabolic process	2	0.0337477	0.261	0.286	Biological Process	GO:0032344	regulation of aldosterone metabolic process	0.0337477	0.228	0	0	2	7
GO:0032347 regulation of aldosterone biosynthetic process	2	0.0337477	0.261	0.286	Biological Process	GO:0032347	regulation of aldosterone biosynthetic process	0.0337477	0.228	0	0	2	7
GO:0033299 secretion of lysosomal enzymes	2	0.0337477	0.261	0.286	Biological Process	GO:0033299	secretion of lysosomal enzymes	0.0337477	0.228	0	0	2	7
GO:0035280 miRNA loading onto RISC involved in gene silencing by miRNA	2	0.0337477	0.261	0.286	Biological Process	GO:0035280	miRNA loading onto RISC involved in gene silencing by miRNA	0.0337477	0.228	0	0	2	7
GO:0044691 tooth eruption	2	0.0337477	0.261	0.286	Biological Process	GO:0044691	tooth eruption	0.0337477	0.228	0	0	2	7
GO:0060017 parathyroid gland development	2	0.0337477	0.261	0.286	Biological Process	GO:0060017	parathyroid gland development	0.0337477	0.228	0	0	2	7
GO:0060872 semicircular canal development	2	0.0337477	0.261	0.286	Biological Process	GO:0060872	semicircular canal development	0.0337477	0.228	0	0	2	7
GO:0072007 mesangial cell differentiation	2	0.0337477	0.261	0.286	Biological Process	GO:0072007	mesangial cell differentiation	0.0337477	0.228	0	0	2	7
GO:0098838 folate transmembrane transport	2	0.0337477	0.261	0.286	Biological Process	GO:0098838	folate transmembrane transport	0.0337477	0.228	0	0	2	7
GO:1900125 regulation of hyaluronan biosynthetic process	2	0.0337477	0.261	0.286	Biological Process	GO:1900125	regulation of hyaluronan biosynthetic process	0.0337477	0.228	0	0	2	7
GO:1902961 positive regulation of aspartic-type endopeptidase activity involved in amyloid precursor protein catabolic process	2	0.0337477	0.261	0.286	Biological Process	GO:1902961	positive regulation of aspartic-type endopeptidase activity involved in amyloid precursor protein catabolic process	0.0337477	0.228	0	0	2	7
GO:1903525 regulation of membrane tubulation	2	0.0337477	0.261	0.286	Biological Process	GO:1903525	regulation of membrane tubulation	0.0337477	0.228	0	0	2	7
GO:1990456 mitochondrion-endoplasmic reticulum membrane tethering	2	0.0337477	0.261	0.286	Biological Process	GO:1990456	mitochondrion-endoplasmic reticulum membrane tethering	0.0337477	0.228	0	0	2	7
GO:2000064 regulation of cortisol biosynthetic process	2	0.0337477	0.261	0.286	Biological Process	GO:2000064	regulation of cortisol biosynthetic process	0.0337477	0.228	0	0	2	7
GO:2001033 negative regulation of double-strand break repair via nonhomologous end joining	2	0.0337477	0.261	0.286	Biological Process	GO:2001033	negative regulation of double-strand break repair via nonhomologous end joining	0.0337477	0.228	0	0	2	7
GO:0060021 roof of mouth development	8	0.0338619	1.046	0.092	Biological Process	GO:0060021	roof of mouth development	0.0338619	0.228159	0	0	8	87
GO:0051169 nuclear transport	23	0.0345531	3.007	0.065	Biological Process	GO:0051169	nuclear transport	0.0345531	0.228159	0	0	23	355
GO:0002830 positive regulation of type 2 immune response	3	0.0345645	0.392	0.176	Biological Process	GO:0002830	positive regulation of type 2 immune response	0.0345645	0.228159	0	0	3	17
GO:0006978 DNA damage response, signal transduction by p53 class mediator resulting in transcription of p21 class mediator	3	0.0345645	0.392	0.176	Biological Process	GO:0006978	DNA damage response, signal transduction by p53 class mediator resulting in transcription of p21 class mediator	0.0345645	0.228159	0	0	3	17
GO:0031268 pseudopodium organization	3	0.0345645	0.392	0.176	Biological Process	GO:0031268	pseudopodium organization	0.0345645	0.228159	0	0	3	17
GO:0035278 miRNA mediated inhibition of translation	3	0.0345645	0.392	0.176	Biological Process	GO:0035278	miRNA mediated inhibition of translation	0.0345645	0.228159	0	0	3	17
GO:0040033 negative regulation of translation, ncRNA-mediated	3	0.0345645	0.392	0.176	Biological Process	GO:0040033	negative regulation of translation, ncRNA-mediated	0.0345645	0.228159	0	0	3	17
GO:0043517 positive regulation of DNA damage response, signal transduction by p53 class mediator	3	0.0345645	0.392	0.176	Biological Process	GO:0043517	positive regulation of DNA damage response, signal transduction by p53 class mediator	0.0345645	0.228159	0	0	3	17
GO:0045974 regulation of translation, ncRNA-mediated	3	0.0345645	0.392	0.176	Biological Process	GO:0045974	regulation of translation, ncRNA-mediated	0.0345645	0.228159	0	0	3	17
GO:0070230 positive regulation of lymphocyte apoptotic process	3	0.0345645	0.392	0.176	Biological Process	GO:0070230	positive regulation of lymphocyte apoptotic process	0.0345645	0.228159	0	0	3	17
GO:0070593 dendrite self-avoidance	3	0.0345645	0.392	0.176	Biological Process	GO:0070593	dendrite self-avoidance	0.0345645	0.228159	0	0	3	17
GO:0071850 mitotic cell cycle arrest	3	0.0345645	0.392	0.176	Biological Process	GO:0071850	mitotic cell cycle arrest	0.0345645	0.228159	0	0	3	17
GO:0090083 regulation of inclusion body assembly	3	0.0345645	0.392	0.176	Biological Process	GO:0090083	regulation of inclusion body assembly	0.0345645	0.228159	0	0	3	17
GO:1900119 positive regulation of execution phase of apoptosis	3	0.0345645	0.392	0.176	Biological Process	GO:1900119	positive regulation of execution phase of apoptosis	0.0345645	0.228159	0	0	3	17
GO:1903019 negative regulation of glycoprotein metabolic process	3	0.0345645	0.392	0.176	Biological Process	GO:1903019	negative regulation of glycoprotein metabolic process	0.0345645	0.228159	0	0	3	17
GO:1903818 positive regulation of voltage-gated potassium channel activity	3	0.0345645	0.392	0.176	Biological Process	GO:1903818	positive regulation of voltage-gated potassium channel activity	0.0345645	0.228159	0	0	3	17
GO:1905820 positive regulation of chromosome separation	3	0.0345645	0.392	0.176	Biological Process	GO:1905820	positive regulation of chromosome separation	0.0345645	0.228159	0	0	3	17
GO:0003309 type B pancreatic cell differentiation	4	0.0345814	0.523	0.138	Biological Process	GO:0003309	type B pancreatic cell differentiation	0.0345814	0.228159	0	0	4	29
GO:0019054 modulation by virus of host process	4	0.0345814	0.523	0.138	Biological Process	GO:0019054	modulation by virus of host process	0.0345814	0.228159	0	0	4	29
GO:0045736 negative regulation of cyclin-dependent protein serine/threonine kinase activity	4	0.0345814	0.523	0.138	Biological Process	GO:0045736	negative regulation of cyclin-dependent protein serine/threonine kinase activity	0.0345814	0.228159	0	0	4	29
GO:0048665 neuron fate specification	4	0.0345814	0.523	0.138	Biological Process	GO:0048665	neuron fate specification	0.0345814	0.228159	0	0	4	29
GO:0048753 pigment granule organization	4	0.0345814	0.523	0.138	Biological Process	GO:0048753	pigment granule organization	0.0345814	0.228159	0	0	4	29
GO:0060148 positive regulation of posttranscriptional gene silencing	4	0.0345814	0.523	0.138	Biological Process	GO:0060148	positive regulation of posttranscriptional gene silencing	0.0345814	0.228159	0	0	4	29
GO:0140058 neuron projection arborization	4	0.0345814	0.523	0.138	Biological Process	GO:0140058	neuron projection arborization	0.0345814	0.228159	0	0	4	29
GO:0090287 regulation of cellular response to growth factor stimulus	20	0.0351136	2.614	0.067	Biological Process	GO:0090287	regulation of cellular response to growth factor stimulus	0.0351136	0.228159	0	0	20	299
GO:0044089 positive regulation of cellular component biogenesis	34	0.0353302	4.444	0.06	Biological Process	GO:0044089	positive regulation of cellular component biogenesis	0.0353302	0.228159	0	0	34	570
GO:0001701 in utero embryonic development	24	0.0354262	3.137	0.064	Biological Process	GO:0001701	in utero embryonic development	0.0354262	0.228159	0	0	24	375
GO:0001954 positive regulation of cell-matrix adhesion	6	0.0354453	0.784	0.105	Biological Process	GO:0001954	positive regulation of cell-matrix adhesion	0.0354453	0.228159	0	0	6	57
GO:1990089 response to nerve growth factor	6	0.0354453	0.784	0.105	Biological Process	GO:1990089	response to nerve growth factor	0.0354453	0.228159	0	0	6	57
GO:2001235 positive regulation of apoptotic signaling pathway	13	0.0354744	1.699	0.076	Biological Process	GO:2001235	positive regulation of apoptotic signaling pathway	0.0354744	0.228159	0	0	13	172
GO:0006672 ceramide metabolic process	9	0.0355734	1.176	0.087	Biological Process	GO:0006672	ceramide metabolic process	0.0355734	0.228159	0	0	9	104
GO:0022409 positive regulation of cell-cell adhesion	19	0.0358023	2.484	0.068	Biological Process	GO:0022409	positive regulation of cell-cell adhesion	0.0358023	0.228159	0	0	19	281
GO:0022610 biological adhesion	78	0.0359328	10.196	0.053	Biological Process	GO:0022610	biological adhesion	0.0359328	0.228159	0	0	78	1479
GO:0008637 apoptotic mitochondrial changes	10	0.0363511	1.307	0.083	Biological Process	GO:0008637	apoptotic mitochondrial changes	0.0363511	0.228159	0	0	10	121
GO:0001654 eye development	24	0.0363666	3.137	0.064	Biological Process	GO:0001654	eye development	0.0363666	0.228159	0	0	24	376
GO:0061337 cardiac conduction	11	0.0364737	1.438	0.08	Biological Process	GO:0061337	cardiac conduction	0.0364737	0.228159	0	0	11	138
GO:0030890 positive regulation of B cell proliferation	5	0.0366191	0.654	0.116	Biological Process	GO:0030890	positive regulation of B cell proliferation	0.0366191	0.228159	0	0	5	43
GO:2000826 regulation of heart morphogenesis	5	0.0366191	0.654	0.116	Biological Process	GO:2000826	regulation of heart morphogenesis	0.0366191	0.228159	0	0	5	43
GO:0030097 hemopoiesis	52	0.036895	6.797	0.055	Biological Process	GO:0030097	hemopoiesis	0.036895	0.228159	0	0	52	937
GO:0009267 cellular response to starvation	14	0.037301	1.83	0.073	Biological Process	GO:0009267	cellular response to starvation	0.037301	0.228159	0	0	14	191
GO:0021953 central nervous system neuron differentiation	14	0.037301	1.83	0.073	Biological Process	GO:0021953	central nervous system neuron differentiation	0.037301	0.228159	0	0	14	191
GO:0099504 synaptic vesicle cycle	14	0.037301	1.83	0.073	Biological Process	GO:0099504	synaptic vesicle cycle	0.037301	0.228159	0	0	14	191
GO:0034612 response to tumor necrosis factor	21	0.0374351	2.745	0.066	Biological Process	GO:0034612	response to tumor necrosis factor	0.0374351	0.228159	0	0	21	320
GO:0120034 positive regulation of plasma membrane bounded cell projection assembly	9	0.0374861	1.176	0.086	Biological Process	GO:0120034	positive regulation of plasma membrane bounded cell projection assembly	0.0374861	0.228159	0	0	9	105
GO:0072401 signal transduction involved in DNA integrity checkpoint	7	0.03756	0.915	0.096	Biological Process	GO:0072401	signal transduction involved in DNA integrity checkpoint	0.03756	0.228159	0	0	7	73
GO:0072422 signal transduction involved in DNA damage checkpoint	7	0.03756	0.915	0.096	Biological Process	GO:0072422	signal transduction involved in DNA damage checkpoint	0.03756	0.228159	0	0	7	73
GO:1903391 regulation of adherens junction organization	7	0.03756	0.915	0.096	Biological Process	GO:1903391	regulation of adherens junction organization	0.03756	0.228159	0	0	7	73
GO:1903747 regulation of establishment of protein localization to mitochondrion	7	0.03756	0.915	0.096	Biological Process	GO:1903747	regulation of establishment of protein localization to mitochondrion	0.03756	0.228159	0	0	7	73
GO:2000300 regulation of synaptic vesicle exocytosis	7	0.03756	0.915	0.096	Biological Process	GO:2000300	regulation of synaptic vesicle exocytosis	0.03756	0.228159	0	0	7	73
GO:0010770 positive regulation of cell morphogenesis involved in differentiation	12	0.0376815	1.569	0.077	Biological Process	GO:0010770	positive regulation of cell morphogenesis involved in differentiation	0.0376815	0.228159	0	0	12	156
GO:1903522 regulation of blood circulation	19	0.0380413	2.484	0.067	Biological Process	GO:1903522	regulation of blood circulation	0.0380413	0.228159	0	0	19	283
GO:0072073 kidney epithelium development	11	0.0381356	1.438	0.079	Biological Process	GO:0072073	kidney epithelium development	0.0381356	0.228159	0	0	11	139
GO:1903531 negative regulation of secretion by cell	11	0.0381356	1.438	0.079	Biological Process	GO:1903531	negative regulation of secretion by cell	0.0381356	0.228159	0	0	11	139
GO:0051193 regulation of cofactor metabolic process	10	0.0381361	1.307	0.082	Biological Process	GO:0051193	regulation of cofactor metabolic process	0.0381361	0.228159	0	0	10	122
GO:0051181 cofactor transport	6	0.0381519	0.784	0.103	Biological Process	GO:0051181	cofactor transport	0.0381519	0.228159	0	0	6	58
GO:0055021 regulation of cardiac muscle tissue growth	6	0.0381519	0.784	0.103	Biological Process	GO:0055021	regulation of cardiac muscle tissue growth	0.0381519	0.228159	0	0	6	58
GO:1903749 positive regulation of establishment of protein localization to mitochondrion	6	0.0381519	0.784	0.103	Biological Process	GO:1903749	positive regulation of establishment of protein localization to mitochondrion	0.0381519	0.228159	0	0	6	58
GO:1904705 regulation of vascular smooth muscle cell proliferation	6	0.0381519	0.784	0.103	Biological Process	GO:1904705	regulation of vascular smooth muscle cell proliferation	0.0381519	0.228159	0	0	6	58
GO:1990874 vascular smooth muscle cell proliferation	6	0.0381519	0.784	0.103	Biological Process	GO:1990874	vascular smooth muscle cell proliferation	0.0381519	0.228159	0	0	6	58
GO:0030833 regulation of actin filament polymerization	13	0.0383911	1.699	0.075	Biological Process	GO:0030833	regulation of actin filament polymerization	0.0383911	0.228159	0	0	13	174
GO:0044550 secondary metabolite biosynthetic process	4	0.0385861	0.523	0.133	Biological Process	GO:0044550	secondary metabolite biosynthetic process	0.0385861	0.228159	0	0	4	30
GO:0070229 negative regulation of lymphocyte apoptotic process	4	0.0385861	0.523	0.133	Biological Process	GO:0070229	negative regulation of lymphocyte apoptotic process	0.0385861	0.228159	0	0	4	30
GO:1902751 positive regulation of cell cycle G2/M phase transition	4	0.0385861	0.523	0.133	Biological Process	GO:1902751	positive regulation of cell cycle G2/M phase transition	0.0385861	0.228159	0	0	4	30
GO:1904030 negative regulation of cyclin-dependent protein kinase activity	4	0.0385861	0.523	0.133	Biological Process	GO:1904030	negative regulation of cyclin-dependent protein kinase activity	0.0385861	0.228159	0	0	4	30
GO:1903034 regulation of response to wounding	14	0.0387127	1.83	0.073	Biological Process	GO:1903034	regulation of response to wounding	0.0387127	0.228159	0	0	14	192
GO:0031329 regulation of cellular catabolic process	52	0.038733	6.797	0.055	Biological Process	GO:0031329	regulation of cellular catabolic process	0.038733	0.228159	0	0	52	940
GO:0001525 angiogenesis	31	0.0388126	4.052	0.06	Biological Process	GO:0001525	angiogenesis	0.0388126	0.228159	0	0	31	515
GO:0043500 muscle adaptation	9	0.0394678	1.176	0.085	Biological Process	GO:0043500	muscle adaptation	0.0394678	0.228159	0	0	9	106
GO:0032880 regulation of protein localization	50	0.0395106	6.536	0.056	Biological Process	GO:0032880	regulation of protein localization	0.0395106	0.228159	0	0	50	900
GO:0007568 aging	21	0.0395965	2.745	0.065	Biological Process	GO:0007568	aging	0.0395965	0.228159	0	0	21	322
GO:0051648 vesicle localization	21	0.0395965	2.745	0.065	Biological Process	GO:0051648	vesicle localization	0.0395965	0.228159	0	0	21	322
GO:0017038 protein import	16	0.0398277	2.092	0.07	Biological Process	GO:0017038	protein import	0.0398277	0.228159	0	0	16	229
GO:0090101 negative regulation of transmembrane receptor protein serine/threonine kinase signaling pathway	11	0.0398496	1.438	0.079	Biological Process	GO:0090101	negative regulation of transmembrane receptor protein serine/threonine kinase signaling pathway	0.0398496	0.228159	0	0	11	140
GO:0032924 activin receptor signaling pathway	5	0.0399043	0.654	0.114	Biological Process	GO:0032924	activin receptor signaling pathway	0.0399043	0.228159	0	0	5	44
GO:0070266 necroptotic process	5	0.0399043	0.654	0.114	Biological Process	GO:0070266	necroptotic process	0.0399043	0.228159	0	0	5	44
GO:0098815 modulation of excitatory postsynaptic potential	5	0.0399043	0.654	0.114	Biological Process	GO:0098815	modulation of excitatory postsynaptic potential	0.0399043	0.228159	0	0	5	44
GO:2000273 positive regulation of signaling receptor activity	5	0.0399043	0.654	0.114	Biological Process	GO:2000273	positive regulation of signaling receptor activity	0.0399043	0.228159	0	0	5	44
GO:1904950 negative regulation of establishment of protein localization	10	0.0399807	1.307	0.081	Biological Process	GO:1904950	negative regulation of establishment of protein localization	0.0399807	0.228159	0	0	10	123
GO:0048644 muscle organ morphogenesis	7	0.0400073	0.915	0.095	Biological Process	GO:0048644	muscle organ morphogenesis	0.0400073	0.228159	0	0	7	74
GO:0030041 actin filament polymerization	14	0.0401622	1.83	0.073	Biological Process	GO:0030041	actin filament polymerization	0.0401622	0.228159	0	0	14	193
GO:0007221 positive regulation of transcription of Notch receptor target	3	0.0401839	0.392	0.167	Biological Process	GO:0007221	positive regulation of transcription of Notch receptor target	0.0401839	0.228159	0	0	3	18
GO:0009208 pyrimidine ribonucleoside triphosphate metabolic process	3	0.0401839	0.392	0.167	Biological Process	GO:0009208	pyrimidine ribonucleoside triphosphate metabolic process	0.0401839	0.228159	0	0	3	18
GO:0035461 vitamin transmembrane transport	3	0.0401839	0.392	0.167	Biological Process	GO:0035461	vitamin transmembrane transport	0.0401839	0.228159	0	0	3	18
GO:0042772 DNA damage response, signal transduction resulting in transcription	3	0.0401839	0.392	0.167	Biological Process	GO:0042772	DNA damage response, signal transduction resulting in transcription	0.0401839	0.228159	0	0	3	18
GO:0048486 parasympathetic nervous system development	3	0.0401839	0.392	0.167	Biological Process	GO:0048486	parasympathetic nervous system development	0.0401839	0.228159	0	0	3	18
GO:0048535 lymph node development	3	0.0401839	0.392	0.167	Biological Process	GO:0048535	lymph node development	0.0401839	0.228159	0	0	3	18
GO:0051895 negative regulation of focal adhesion assembly	3	0.0401839	0.392	0.167	Biological Process	GO:0051895	negative regulation of focal adhesion assembly	0.0401839	0.228159	0	0	3	18
GO:0070242 thymocyte apoptotic process	3	0.0401839	0.392	0.167	Biological Process	GO:0070242	thymocyte apoptotic process	0.0401839	0.228159	0	0	3	18
GO:0072079 nephron tubule formation	3	0.0401839	0.392	0.167	Biological Process	GO:0072079	nephron tubule formation	0.0401839	0.228159	0	0	3	18
GO:1902004 positive regulation of amyloid-beta formation	3	0.0401839	0.392	0.167	Biological Process	GO:1902004	positive regulation of amyloid-beta formation	0.0401839	0.228159	0	0	3	18
GO:1902170 cellular response to reactive nitrogen species	3	0.0401839	0.392	0.167	Biological Process	GO:1902170	cellular response to reactive nitrogen species	0.0401839	0.228159	0	0	3	18
GO:1902683 regulation of receptor localization to synapse	3	0.0401839	0.392	0.167	Biological Process	GO:1902683	regulation of receptor localization to synapse	0.0401839	0.228159	0	0	3	18
GO:1904263 positive regulation of TORC1 signaling	3	0.0401839	0.392	0.167	Biological Process	GO:1904263	positive regulation of TORC1 signaling	0.0401839	0.228159	0	0	3	18
GO:0045921 positive regulation of exocytosis	8	0.040224	1.046	0.089	Biological Process	GO:0045921	positive regulation of exocytosis	0.040224	0.228159	0	0	8	90
GO:0150063 visual system development	24	0.0403154	3.137	0.063	Biological Process	GO:0150063	visual system development	0.0403154	0.228159	0	0	24	380
GO:0002763 positive regulation of myeloid leukocyte differentiation	6	0.0409868	0.784	0.102	Biological Process	GO:0002763	positive regulation of myeloid leukocyte differentiation	0.0409868	0.228159	0	0	6	59
GO:0055008 cardiac muscle tissue morphogenesis	6	0.0409868	0.784	0.102	Biological Process	GO:0055008	cardiac muscle tissue morphogenesis	0.0409868	0.228159	0	0	6	59
GO:0044264 cellular polysaccharide metabolic process	9	0.0415195	1.176	0.084	Biological Process	GO:0044264	cellular polysaccharide metabolic process	0.0415195	0.228159	0	0	9	107
GO:0007159 leukocyte cell-cell adhesion	23	0.0416104	3.007	0.064	Biological Process	GO:0007159	leukocyte cell-cell adhesion	0.0416104	0.228159	0	0	23	362
GO:1990542 mitochondrial transmembrane transport	10	0.0418856	1.307	0.081	Biological Process	GO:1990542	mitochondrial transmembrane transport	0.0418856	0.228159	0	0	10	124
GO:0015711 organic anion transport	30	0.0421288	3.922	0.06	Biological Process	GO:0015711	organic anion transport	0.0421288	0.228159	0	0	30	499
GO:0032412 regulation of ion transmembrane transporter activity	18	0.0424888	2.353	0.067	Biological Process	GO:0032412	regulation of ion transmembrane transporter activity	0.0424888	0.228159	0	0	18	268
GO:0006919 activation of cysteine-type endopeptidase activity involved in apoptotic process	8	0.04251	1.046	0.088	Biological Process	GO:0006919	activation of cysteine-type endopeptidase activity involved in apoptotic process	0.04251	0.228159	0	0	8	91
GO:1903530 regulation of secretion by cell	34	0.0425544	4.444	0.059	Biological Process	GO:1903530	regulation of secretion by cell	0.0425544	0.228159	0	0	34	579
GO:0033692 cellular polysaccharide biosynthetic process	7	0.0425562	0.915	0.093	Biological Process	GO:0033692	cellular polysaccharide biosynthetic process	0.0425562	0.228159	0	0	7	75
GO:0051785 positive regulation of nuclear division	7	0.0425562	0.915	0.093	Biological Process	GO:0051785	positive regulation of nuclear division	0.0425562	0.228159	0	0	7	75
GO:0035115 embryonic forelimb morphogenesis	4	0.0428447	0.523	0.129	Biological Process	GO:0035115	embryonic forelimb morphogenesis	0.0428447	0.228159	0	0	4	31
GO:0040018 positive regulation of multicellular organism growth	4	0.0428447	0.523	0.129	Biological Process	GO:0040018	positive regulation of multicellular organism growth	0.0428447	0.228159	0	0	4	31
GO:0060317 cardiac epithelial to mesenchymal transition	4	0.0428447	0.523	0.129	Biological Process	GO:0060317	cardiac epithelial to mesenchymal transition	0.0428447	0.228159	0	0	4	31
GO:0061384 heart trabecula morphogenesis	4	0.0428447	0.523	0.129	Biological Process	GO:0061384	heart trabecula morphogenesis	0.0428447	0.228159	0	0	4	31
GO:0000917 division septum assembly	1	0.0431156	0.131	1	Biological Process	GO:0000917	division septum assembly	0.0431156	0.228159	0	0	1	1
GO:0001927 exocyst assembly	1	0.0431156	0.131	1	Biological Process	GO:0001927	exocyst assembly	0.0431156	0.228159	0	0	1	1
GO:0001928 regulation of exocyst assembly	1	0.0431156	0.131	1	Biological Process	GO:0001928	regulation of exocyst assembly	0.0431156	0.228159	0	0	1	1
GO:0002100 tRNA wobble adenosine to inosine editing	1	0.0431156	0.131	1	Biological Process	GO:0002100	tRNA wobble adenosine to inosine editing	0.0431156	0.228159	0	0	1	1
GO:0002174 mammary stem cell proliferation	1	0.0431156	0.131	1	Biological Process	GO:0002174	mammary stem cell proliferation	0.0431156	0.228159	0	0	1	1
GO:0002319 memory B cell differentiation	1	0.0431156	0.131	1	Biological Process	GO:0002319	memory B cell differentiation	0.0431156	0.228159	0	0	1	1
GO:0002875 negative regulation of chronic inflammatory response to antigenic stimulus	1	0.0431156	0.131	1	Biological Process	GO:0002875	negative regulation of chronic inflammatory response to antigenic stimulus	0.0431156	0.228159	0	0	1	1
GO:0003131 mesodermal-endodermal cell signaling	1	0.0431156	0.131	1	Biological Process	GO:0003131	mesodermal-endodermal cell signaling	0.0431156	0.228159	0	0	1	1
GO:0003144 embryonic heart tube formation	1	0.0431156	0.131	1	Biological Process	GO:0003144	embryonic heart tube formation	0.0431156	0.228159	0	0	1	1
GO:0003226 right ventricular compact myocardium morphogenesis	1	0.0431156	0.131	1	Biological Process	GO:0003226	right ventricular compact myocardium morphogenesis	0.0431156	0.228159	0	0	1	1
GO:0003350 pulmonary myocardium development	1	0.0431156	0.131	1	Biological Process	GO:0003350	pulmonary myocardium development	0.0431156	0.228159	0	0	1	1
GO:0006683 galactosylceramide catabolic process	1	0.0431156	0.131	1	Biological Process	GO:0006683	galactosylceramide catabolic process	0.0431156	0.228159	0	0	1	1
GO:0006713 glucocorticoid catabolic process	1	0.0431156	0.131	1	Biological Process	GO:0006713	glucocorticoid catabolic process	0.0431156	0.228159	0	0	1	1
GO:0007371 ventral midline determination	1	0.0431156	0.131	1	Biological Process	GO:0007371	ventral midline determination	0.0431156	0.228159	0	0	1	1
GO:0007387 anterior compartment pattern formation	1	0.0431156	0.131	1	Biological Process	GO:0007387	anterior compartment pattern formation	0.0431156	0.228159	0	0	1	1
GO:0007388 posterior compartment specification	1	0.0431156	0.131	1	Biological Process	GO:0007388	posterior compartment specification	0.0431156	0.228159	0	0	1	1
GO:0010034 response to acetate	1	0.0431156	0.131	1	Biological Process	GO:0010034	response to acetate	0.0431156	0.228159	0	0	1	1
GO:0015826 threonine transport	1	0.0431156	0.131	1	Biological Process	GO:0015826	threonine transport	0.0431156	0.228159	0	0	1	1
GO:0015887 pantothenate transmembrane transport	1	0.0431156	0.131	1	Biological Process	GO:0015887	pantothenate transmembrane transport	0.0431156	0.228159	0	0	1	1
GO:0016256 N-glycan processing to lysosome	1	0.0431156	0.131	1	Biological Process	GO:0016256	N-glycan processing to lysosome	0.0431156	0.228159	0	0	1	1
GO:0018166 C-terminal protein-tyrosinylation	1	0.0431156	0.131	1	Biological Process	GO:0018166	C-terminal protein-tyrosinylation	0.0431156	0.228159	0	0	1	1
GO:0018322 protein tyrosinylation	1	0.0431156	0.131	1	Biological Process	GO:0018322	protein tyrosinylation	0.0431156	0.228159	0	0	1	1
GO:0018400 peptidyl-proline hydroxylation to 3-hydroxy-L-proline	1	0.0431156	0.131	1	Biological Process	GO:0018400	peptidyl-proline hydroxylation to 3-hydroxy-L-proline	0.0431156	0.228159	0	0	1	1
GO:0021723 medullary reticular formation development	1	0.0431156	0.131	1	Biological Process	GO:0021723	medullary reticular formation development	0.0431156	0.228159	0	0	1	1
GO:0021754 facial nucleus development	1	0.0431156	0.131	1	Biological Process	GO:0021754	facial nucleus development	0.0431156	0.228159	0	0	1	1
GO:0021757 caudate nucleus development	1	0.0431156	0.131	1	Biological Process	GO:0021757	caudate nucleus development	0.0431156	0.228159	0	0	1	1
GO:0021758 putamen development	1	0.0431156	0.131	1	Biological Process	GO:0021758	putamen development	0.0431156	0.228159	0	0	1	1
GO:0021919 BMP signaling pathway involved in spinal cord dorsal/ventral patterning	1	0.0431156	0.131	1	Biological Process	GO:0021919	BMP signaling pathway involved in spinal cord dorsal/ventral patterning	0.0431156	0.228159	0	0	1	1
GO:0022013 pallium cell proliferation in forebrain	1	0.0431156	0.131	1	Biological Process	GO:0022013	pallium cell proliferation in forebrain	0.0431156	0.228159	0	0	1	1
GO:0031583 phospholipase D-activating G protein-coupled receptor signaling pathway	1	0.0431156	0.131	1	Biological Process	GO:0031583	phospholipase D-activating G protein-coupled receptor signaling pathway	0.0431156	0.228159	0	0	1	1
GO:0032475 otolith formation	1	0.0431156	0.131	1	Biological Process	GO:0032475	otolith formation	0.0431156	0.228159	0	0	1	1
GO:0032848 negative regulation of cellular pH reduction	1	0.0431156	0.131	1	Biological Process	GO:0032848	negative regulation of cellular pH reduction	0.0431156	0.228159	0	0	1	1
GO:0034589 hydroxyproline transport	1	0.0431156	0.131	1	Biological Process	GO:0034589	hydroxyproline transport	0.0431156	0.228159	0	0	1	1
GO:0035978 histone H2A-S139 phosphorylation	1	0.0431156	0.131	1	Biological Process	GO:0035978	histone H2A-S139 phosphorylation	0.0431156	0.228159	0	0	1	1
GO:0038002 endocrine signaling	1	0.0431156	0.131	1	Biological Process	GO:0038002	endocrine signaling	0.0431156	0.228159	0	0	1	1
GO:0038115 chemokine (C-C motif) ligand 19 signaling pathway	1	0.0431156	0.131	1	Biological Process	GO:0038115	chemokine (C-C motif) ligand 19 signaling pathway	0.0431156	0.228159	0	0	1	1
GO:0038167 epidermal growth factor receptor signaling pathway via positive regulation of NF-kappaB transcription factor activity	1	0.0431156	0.131	1	Biological Process	GO:0038167	epidermal growth factor receptor signaling pathway via positive regulation of NF-kappaB transcription factor activity	0.0431156	0.228159	0	0	1	1
GO:0038168 epidermal growth factor receptor signaling pathway via I-kappaB kinase/NF-kappaB cascade	1	0.0431156	0.131	1	Biological Process	GO:0038168	epidermal growth factor receptor signaling pathway via I-kappaB kinase/NF-kappaB cascade	0.0431156	0.228159	0	0	1	1
GO:0042313 protein kinase C deactivation	1	0.0431156	0.131	1	Biological Process	GO:0042313	protein kinase C deactivation	0.0431156	0.228159	0	0	1	1
GO:0043179 rhythmic excitation	1	0.0431156	0.131	1	Biological Process	GO:0043179	rhythmic excitation	0.0431156	0.228159	0	0	1	1
GO:0043973 histone H3-K4 acetylation	1	0.0431156	0.131	1	Biological Process	GO:0043973	histone H3-K4 acetylation	0.0431156	0.228159	0	0	1	1
GO:0045208 MAPK phosphatase export from nucleus	1	0.0431156	0.131	1	Biological Process	GO:0045208	MAPK phosphatase export from nucleus	0.0431156	0.228159	0	0	1	1
GO:0045209 MAPK phosphatase export from nucleus, leptomycin B sensitive	1	0.0431156	0.131	1	Biological Process	GO:0045209	MAPK phosphatase export from nucleus, leptomycin B sensitive	0.0431156	0.228159	0	0	1	1
GO:0045828 positive regulation of isoprenoid metabolic process	1	0.0431156	0.131	1	Biological Process	GO:0045828	positive regulation of isoprenoid metabolic process	0.0431156	0.228159	0	0	1	1
GO:0048132 female germ-line stem cell asymmetric division	1	0.0431156	0.131	1	Biological Process	GO:0048132	female germ-line stem cell asymmetric division	0.0431156	0.228159	0	0	1	1
GO:0048892 lateral line nerve development	1	0.0431156	0.131	1	Biological Process	GO:0048892	lateral line nerve development	0.0431156	0.228159	0	0	1	1
GO:0048894 efferent axon development in a lateral line nerve	1	0.0431156	0.131	1	Biological Process	GO:0048894	efferent axon development in a lateral line nerve	0.0431156	0.228159	0	0	1	1
GO:0051543 regulation of elastin biosynthetic process	1	0.0431156	0.131	1	Biological Process	GO:0051543	regulation of elastin biosynthetic process	0.0431156	0.228159	0	0	1	1
GO:0051545 negative regulation of elastin biosynthetic process	1	0.0431156	0.131	1	Biological Process	GO:0051545	negative regulation of elastin biosynthetic process	0.0431156	0.228159	0	0	1	1
GO:0051666 actin cortical patch localization	1	0.0431156	0.131	1	Biological Process	GO:0051666	actin cortical patch localization	0.0431156	0.228159	0	0	1	1
GO:0060178 regulation of exocyst localization	1	0.0431156	0.131	1	Biological Process	GO:0060178	regulation of exocyst localization	0.0431156	0.228159	0	0	1	1
GO:0060376 positive regulation of mast cell differentiation	1	0.0431156	0.131	1	Biological Process	GO:0060376	positive regulation of mast cell differentiation	0.0431156	0.228159	0	0	1	1
GO:0060929 atrioventricular node cell fate commitment	1	0.0431156	0.131	1	Biological Process	GO:0060929	atrioventricular node cell fate commitment	0.0431156	0.228159	0	0	1	1
GO:0060980 cell migration involved in coronary vasculogenesis	1	0.0431156	0.131	1	Biological Process	GO:0060980	cell migration involved in coronary vasculogenesis	0.0431156	0.228159	0	0	1	1
GO:0061301 cerebellum vasculature morphogenesis	1	0.0431156	0.131	1	Biological Process	GO:0061301	cerebellum vasculature morphogenesis	0.0431156	0.228159	0	0	1	1
GO:0061408 positive regulation of transcription from RNA polymerase II promoter in response to heat stress	1	0.0431156	0.131	1	Biological Process	GO:0061408	positive regulation of transcription from RNA polymerase II promoter in response to heat stress	0.0431156	0.228159	0	0	1	1
GO:0061451 retrotrapezoid nucleus development	1	0.0431156	0.131	1	Biological Process	GO:0061451	retrotrapezoid nucleus development	0.0431156	0.228159	0	0	1	1
GO:0061452 retrotrapezoid nucleus neuron differentiation	1	0.0431156	0.131	1	Biological Process	GO:0061452	retrotrapezoid nucleus neuron differentiation	0.0431156	0.228159	0	0	1	1
GO:0061871 negative regulation of hepatic stellate cell migration	1	0.0431156	0.131	1	Biological Process	GO:0061871	negative regulation of hepatic stellate cell migration	0.0431156	0.228159	0	0	1	1
GO:0070183 mitochondrial tryptophanyl-tRNA aminoacylation	1	0.0431156	0.131	1	Biological Process	GO:0070183	mitochondrial tryptophanyl-tRNA aminoacylation	0.0431156	0.228159	0	0	1	1
GO:0070208 protein heterotrimerization	1	0.0431156	0.131	1	Biological Process	GO:0070208	protein heterotrimerization	0.0431156	0.228159	0	0	1	1
GO:0070731 cGMP transport	1	0.0431156	0.131	1	Biological Process	GO:0070731	cGMP transport	0.0431156	0.228159	0	0	1	1
GO:0071258 cellular response to gravity	1	0.0431156	0.131	1	Biological Process	GO:0071258	cellular response to gravity	0.0431156	0.228159	0	0	1	1
GO:0071387 cellular response to cortisol stimulus	1	0.0431156	0.131	1	Biological Process	GO:0071387	cellular response to cortisol stimulus	0.0431156	0.228159	0	0	1	1
GO:0071454 cellular response to anoxia	1	0.0431156	0.131	1	Biological Process	GO:0071454	cellular response to anoxia	0.0431156	0.228159	0	0	1	1
GO:0071580 regulation of zinc ion transmembrane transport	1	0.0431156	0.131	1	Biological Process	GO:0071580	regulation of zinc ion transmembrane transport	0.0431156	0.228159	0	0	1	1
GO:0071581 regulation of zinc ion transmembrane import	1	0.0431156	0.131	1	Biological Process	GO:0071581	regulation of zinc ion transmembrane import	0.0431156	0.228159	0	0	1	1
GO:0071582 negative regulation of zinc ion transport	1	0.0431156	0.131	1	Biological Process	GO:0071582	negative regulation of zinc ion transport	0.0431156	0.228159	0	0	1	1
GO:0071583 negative regulation of zinc ion transmembrane transport	1	0.0431156	0.131	1	Biological Process	GO:0071583	negative regulation of zinc ion transmembrane transport	0.0431156	0.228159	0	0	1	1
GO:0071584 negative regulation of zinc ion transmembrane import	1	0.0431156	0.131	1	Biological Process	GO:0071584	negative regulation of zinc ion transmembrane import	0.0431156	0.228159	0	0	1	1
GO:0071606 chemokine (C-C motif) ligand 4 production	1	0.0431156	0.131	1	Biological Process	GO:0071606	chemokine (C-C motif) ligand 4 production	0.0431156	0.228159	0	0	1	1
GO:0071643 regulation of chemokine (C-C motif) ligand 4 production	1	0.0431156	0.131	1	Biological Process	GO:0071643	regulation of chemokine (C-C motif) ligand 4 production	0.0431156	0.228159	0	0	1	1
GO:0071644 negative regulation of chemokine (C-C motif) ligand 4 production	1	0.0431156	0.131	1	Biological Process	GO:0071644	negative regulation of chemokine (C-C motif) ligand 4 production	0.0431156	0.228159	0	0	1	1
GO:0071765 nuclear inner membrane organization	1	0.0431156	0.131	1	Biological Process	GO:0071765	nuclear inner membrane organization	0.0431156	0.228159	0	0	1	1
GO:0071911 synchronous neurotransmitter secretion	1	0.0431156	0.131	1	Biological Process	GO:0071911	synchronous neurotransmitter secretion	0.0431156	0.228159	0	0	1	1
GO:0072036 mesenchymal to epithelial transition involved in renal vesicle formation	1	0.0431156	0.131	1	Biological Process	GO:0072036	mesenchymal to epithelial transition involved in renal vesicle formation	0.0431156	0.228159	0	0	1	1
GO:0072046 establishment of planar polarity involved in nephron morphogenesis	1	0.0431156	0.131	1	Biological Process	GO:0072046	establishment of planar polarity involved in nephron morphogenesis	0.0431156	0.228159	0	0	1	1
GO:0072165 anterior mesonephric tubule development	1	0.0431156	0.131	1	Biological Process	GO:0072165	anterior mesonephric tubule development	0.0431156	0.228159	0	0	1	1
GO:0072167 specification of mesonephric tubule identity	1	0.0431156	0.131	1	Biological Process	GO:0072167	specification of mesonephric tubule identity	0.0431156	0.228159	0	0	1	1
GO:0072168 specification of anterior mesonephric tubule identity	1	0.0431156	0.131	1	Biological Process	GO:0072168	specification of anterior mesonephric tubule identity	0.0431156	0.228159	0	0	1	1
GO:0072169 specification of posterior mesonephric tubule identity	1	0.0431156	0.131	1	Biological Process	GO:0072169	specification of posterior mesonephric tubule identity	0.0431156	0.228159	0	0	1	1
GO:0072181 mesonephric duct formation	1	0.0431156	0.131	1	Biological Process	GO:0072181	mesonephric duct formation	0.0431156	0.228159	0	0	1	1
GO:0072184 renal vesicle progenitor cell differentiation	1	0.0431156	0.131	1	Biological Process	GO:0072184	renal vesicle progenitor cell differentiation	0.0431156	0.228159	0	0	1	1
GO:0072255 metanephric glomerular mesangial cell development	1	0.0431156	0.131	1	Biological Process	GO:0072255	metanephric glomerular mesangial cell development	0.0431156	0.228159	0	0	1	1
GO:0072258 metanephric interstitial fibroblast differentiation	1	0.0431156	0.131	1	Biological Process	GO:0072258	metanephric interstitial fibroblast differentiation	0.0431156	0.228159	0	0	1	1
GO:0072259 metanephric interstitial fibroblast development	1	0.0431156	0.131	1	Biological Process	GO:0072259	metanephric interstitial fibroblast development	0.0431156	0.228159	0	0	1	1
GO:0072285 mesenchymal to epithelial transition involved in metanephric renal vesicle formation	1	0.0431156	0.131	1	Biological Process	GO:0072285	mesenchymal to epithelial transition involved in metanephric renal vesicle formation	0.0431156	0.228159	0	0	1	1
GO:0072428 signal transduction involved in intra-S DNA damage checkpoint	1	0.0431156	0.131	1	Biological Process	GO:0072428	signal transduction involved in intra-S DNA damage checkpoint	0.0431156	0.228159	0	0	1	1
GO:0090367 negative regulation of mRNA modification	1	0.0431156	0.131	1	Biological Process	GO:0090367	negative regulation of mRNA modification	0.0431156	0.228159	0	0	1	1
GO:0090529 cell septum assembly	1	0.0431156	0.131	1	Biological Process	GO:0090529	cell septum assembly	0.0431156	0.228159	0	0	1	1
GO:0097370 protein O-GlcNAcylation via threonine	1	0.0431156	0.131	1	Biological Process	GO:0097370	protein O-GlcNAcylation via threonine	0.0431156	0.228159	0	0	1	1
GO:0098582 innate vocalization behavior	1	0.0431156	0.131	1	Biological Process	GO:0098582	innate vocalization behavior	0.0431156	0.228159	0	0	1	1
GO:0098718 serine import across plasma membrane	1	0.0431156	0.131	1	Biological Process	GO:0098718	serine import across plasma membrane	0.0431156	0.228159	0	0	1	1
GO:0098746 fast, calcium ion-dependent exocytosis of neurotransmitter	1	0.0431156	0.131	1	Biological Process	GO:0098746	fast, calcium ion-dependent exocytosis of neurotransmitter	0.0431156	0.228159	0	0	1	1
GO:0098874 spike train	1	0.0431156	0.131	1	Biological Process	GO:0098874	spike train	0.0431156	0.228159	0	0	1	1
GO:0099608 regulation of action potential firing pattern	1	0.0431156	0.131	1	Biological Process	GO:0099608	regulation of action potential firing pattern	0.0431156	0.228159	0	0	1	1
GO:1900054 positive regulation of retinoic acid biosynthetic process	1	0.0431156	0.131	1	Biological Process	GO:1900054	positive regulation of retinoic acid biosynthetic process	0.0431156	0.228159	0	0	1	1
GO:1901229 regulation of non-canonical Wnt signaling pathway via JNK cascade	1	0.0431156	0.131	1	Biological Process	GO:1901229	regulation of non-canonical Wnt signaling pathway via JNK cascade	0.0431156	0.228159	0	0	1	1
GO:1901231 positive regulation of non-canonical Wnt signaling pathway via JNK cascade	1	0.0431156	0.131	1	Biological Process	GO:1901231	positive regulation of non-canonical Wnt signaling pathway via JNK cascade	0.0431156	0.228159	0	0	1	1
GO:1901232 regulation of convergent extension involved in axis elongation	1	0.0431156	0.131	1	Biological Process	GO:1901232	regulation of convergent extension involved in axis elongation	0.0431156	0.228159	0	0	1	1
GO:1901233 negative regulation of convergent extension involved in axis elongation	1	0.0431156	0.131	1	Biological Process	GO:1901233	negative regulation of convergent extension involved in axis elongation	0.0431156	0.228159	0	0	1	1
GO:1901247 negative regulation of lung ciliated cell differentiation	1	0.0431156	0.131	1	Biological Process	GO:1901247	negative regulation of lung ciliated cell differentiation	0.0431156	0.228159	0	0	1	1
GO:1901249 regulation of lung goblet cell differentiation	1	0.0431156	0.131	1	Biological Process	GO:1901249	regulation of lung goblet cell differentiation	0.0431156	0.228159	0	0	1	1
GO:1901251 positive regulation of lung goblet cell differentiation	1	0.0431156	0.131	1	Biological Process	GO:1901251	positive regulation of lung goblet cell differentiation	0.0431156	0.228159	0	0	1	1
GO:1902612 regulation of anti-Mullerian hormone signaling pathway	1	0.0431156	0.131	1	Biological Process	GO:1902612	regulation of anti-Mullerian hormone signaling pathway	0.0431156	0.228159	0	0	1	1
GO:1902613 negative regulation of anti-Mullerian hormone signaling pathway	1	0.0431156	0.131	1	Biological Process	GO:1902613	negative regulation of anti-Mullerian hormone signaling pathway	0.0431156	0.228159	0	0	1	1
GO:1902618 cellular response to fluoride	1	0.0431156	0.131	1	Biological Process	GO:1902618	cellular response to fluoride	0.0431156	0.228159	0	0	1	1
GO:1903056 regulation of melanosome organization	1	0.0431156	0.131	1	Biological Process	GO:1903056	regulation of melanosome organization	0.0431156	0.228159	0	0	1	1
GO:1903235 positive regulation of calcium ion-dependent exocytosis of neurotransmitter	1	0.0431156	0.131	1	Biological Process	GO:1903235	positive regulation of calcium ion-dependent exocytosis of neurotransmitter	0.0431156	0.228159	0	0	1	1
GO:1903450 regulation of G1 to G0 transition	1	0.0431156	0.131	1	Biological Process	GO:1903450	regulation of G1 to G0 transition	0.0431156	0.228159	0	0	1	1
GO:1903452 positive regulation of G1 to G0 transition	1	0.0431156	0.131	1	Biological Process	GO:1903452	positive regulation of G1 to G0 transition	0.0431156	0.228159	0	0	1	1
GO:1903812 L-serine import across plasma membrane	1	0.0431156	0.131	1	Biological Process	GO:1903812	L-serine import across plasma membrane	0.0431156	0.228159	0	0	1	1
GO:1903925 response to bisphenol A	1	0.0431156	0.131	1	Biological Process	GO:1903925	response to bisphenol A	0.0431156	0.228159	0	0	1	1
GO:1903926 cellular response to bisphenol A	1	0.0431156	0.131	1	Biological Process	GO:1903926	cellular response to bisphenol A	0.0431156	0.228159	0	0	1	1
GO:1903996 negative regulation of non-membrane spanning protein tyrosine kinase activity	1	0.0431156	0.131	1	Biological Process	GO:1903996	negative regulation of non-membrane spanning protein tyrosine kinase activity	0.0431156	0.228159	0	0	1	1
GO:1904301 regulation of maternal process involved in parturition	1	0.0431156	0.131	1	Biological Process	GO:1904301	regulation of maternal process involved in parturition	0.0431156	0.228159	0	0	1	1
GO:1904303 positive regulation of maternal process involved in parturition	1	0.0431156	0.131	1	Biological Process	GO:1904303	positive regulation of maternal process involved in parturition	0.0431156	0.228159	0	0	1	1
GO:1904316 response to 2-O-acetyl-1-O-hexadecyl-sn-glycero-3-phosphocholine	1	0.0431156	0.131	1	Biological Process	GO:1904316	response to 2-O-acetyl-1-O-hexadecyl-sn-glycero-3-phosphocholine	0.0431156	0.228159	0	0	1	1
GO:1904317 cellular response to 2-O-acetyl-1-O-hexadecyl-sn-glycero-3-phosphocholine	1	0.0431156	0.131	1	Biological Process	GO:1904317	cellular response to 2-O-acetyl-1-O-hexadecyl-sn-glycero-3-phosphocholine	0.0431156	0.228159	0	0	1	1
GO:1904470 regulation of endothelin secretion	1	0.0431156	0.131	1	Biological Process	GO:1904470	regulation of endothelin secretion	0.0431156	0.228159	0	0	1	1
GO:1904472 positive regulation of endothelin secretion	1	0.0431156	0.131	1	Biological Process	GO:1904472	positive regulation of endothelin secretion	0.0431156	0.228159	0	0	1	1
GO:1904477 positive regulation of Ras GTPase binding	1	0.0431156	0.131	1	Biological Process	GO:1904477	positive regulation of Ras GTPase binding	0.0431156	0.228159	0	0	1	1
GO:1904675 regulation of somatic stem cell division	1	0.0431156	0.131	1	Biological Process	GO:1904675	regulation of somatic stem cell division	0.0431156	0.228159	0	0	1	1
GO:1904677 positive regulation of somatic stem cell division	1	0.0431156	0.131	1	Biological Process	GO:1904677	positive regulation of somatic stem cell division	0.0431156	0.228159	0	0	1	1
GO:1904766 negative regulation of macroautophagy by TORC1 signaling	1	0.0431156	0.131	1	Biological Process	GO:1904766	negative regulation of macroautophagy by TORC1 signaling	0.0431156	0.228159	0	0	1	1
GO:1904843 cellular response to nitroglycerin	1	0.0431156	0.131	1	Biological Process	GO:1904843	cellular response to nitroglycerin	0.0431156	0.228159	0	0	1	1
GO:1904947 folate import into mitochondrion	1	0.0431156	0.131	1	Biological Process	GO:1904947	folate import into mitochondrion	0.0431156	0.228159	0	0	1	1
GO:1905099 positive regulation of guanyl-nucleotide exchange factor activity	1	0.0431156	0.131	1	Biological Process	GO:1905099	positive regulation of guanyl-nucleotide exchange factor activity	0.0431156	0.228159	0	0	1	1
GO:1905176 positive regulation of vascular smooth muscle cell dedifferentiation	1	0.0431156	0.131	1	Biological Process	GO:1905176	positive regulation of vascular smooth muscle cell dedifferentiation	0.0431156	0.228159	0	0	1	1
GO:1905413 regulation of dense core granule exocytosis	1	0.0431156	0.131	1	Biological Process	GO:1905413	regulation of dense core granule exocytosis	0.0431156	0.228159	0	0	1	1
GO:1905454 negative regulation of myeloid progenitor cell differentiation	1	0.0431156	0.131	1	Biological Process	GO:1905454	negative regulation of myeloid progenitor cell differentiation	0.0431156	0.228159	0	0	1	1
GO:1905492 positive regulation of branching morphogenesis of a nerve	1	0.0431156	0.131	1	Biological Process	GO:1905492	positive regulation of branching morphogenesis of a nerve	0.0431156	0.228159	0	0	1	1
GO:1905767 regulation of double-stranded telomeric DNA binding	1	0.0431156	0.131	1	Biological Process	GO:1905767	regulation of double-stranded telomeric DNA binding	0.0431156	0.228159	0	0	1	1
GO:1905768 negative regulation of double-stranded telomeric DNA binding	1	0.0431156	0.131	1	Biological Process	GO:1905768	negative regulation of double-stranded telomeric DNA binding	0.0431156	0.228159	0	0	1	1
GO:1905780 regulation of phosphatidylserine exposure on apoptotic cell surface	1	0.0431156	0.131	1	Biological Process	GO:1905780	regulation of phosphatidylserine exposure on apoptotic cell surface	0.0431156	0.228159	0	0	1	1
GO:1905782 positive regulation of phosphatidylserine exposure on apoptotic cell surface	1	0.0431156	0.131	1	Biological Process	GO:1905782	positive regulation of phosphatidylserine exposure on apoptotic cell surface	0.0431156	0.228159	0	0	1	1
GO:1905794 response to puromycin	1	0.0431156	0.131	1	Biological Process	GO:1905794	response to puromycin	0.0431156	0.228159	0	0	1	1
GO:1905795 cellular response to puromycin	1	0.0431156	0.131	1	Biological Process	GO:1905795	cellular response to puromycin	0.0431156	0.228159	0	0	1	1
GO:1905833 negative regulation of microtubule nucleation	1	0.0431156	0.131	1	Biological Process	GO:1905833	negative regulation of microtubule nucleation	0.0431156	0.228159	0	0	1	1
GO:1905856 negative regulation of pentose-phosphate shunt	1	0.0431156	0.131	1	Biological Process	GO:1905856	negative regulation of pentose-phosphate shunt	0.0431156	0.228159	0	0	1	1
GO:1990092 calcium-dependent self proteolysis	1	0.0431156	0.131	1	Biological Process	GO:1990092	calcium-dependent self proteolysis	0.0431156	0.228159	0	0	1	1
GO:1990248 regulation of transcription from RNA polymerase II promoter in response to DNA damage	1	0.0431156	0.131	1	Biological Process	GO:1990248	regulation of transcription from RNA polymerase II promoter in response to DNA damage	0.0431156	0.228159	0	0	1	1
GO:1990548 mitochondrial FAD transmembrane transport	1	0.0431156	0.131	1	Biological Process	GO:1990548	mitochondrial FAD transmembrane transport	0.0431156	0.228159	0	0	1	1
GO:1990755 mitotic spindle microtubule depolymerization	1	0.0431156	0.131	1	Biological Process	GO:1990755	mitotic spindle microtubule depolymerization	0.0431156	0.228159	0	0	1	1
GO:1990775 endothelin secretion	1	0.0431156	0.131	1	Biological Process	GO:1990775	endothelin secretion	0.0431156	0.228159	0	0	1	1
GO:2000101 regulation of mammary stem cell proliferation	1	0.0431156	0.131	1	Biological Process	GO:2000101	regulation of mammary stem cell proliferation	0.0431156	0.228159	0	0	1	1
GO:2000103 positive regulation of mammary stem cell proliferation	1	0.0431156	0.131	1	Biological Process	GO:2000103	positive regulation of mammary stem cell proliferation	0.0431156	0.228159	0	0	1	1
GO:2000231 positive regulation of pancreatic stellate cell proliferation	1	0.0431156	0.131	1	Biological Process	GO:2000231	positive regulation of pancreatic stellate cell proliferation	0.0431156	0.228159	0	0	1	1
GO:2000522 positive regulation of immunological synapse formation	1	0.0431156	0.131	1	Biological Process	GO:2000522	positive regulation of immunological synapse formation	0.0431156	0.228159	0	0	1	1
GO:2000526 positive regulation of glycoprotein biosynthetic process involved in immunological synapse formation	1	0.0431156	0.131	1	Biological Process	GO:2000526	positive regulation of glycoprotein biosynthetic process involved in immunological synapse formation	0.0431156	0.228159	0	0	1	1
GO:2000548 negative regulation of dendritic cell dendrite assembly	1	0.0431156	0.131	1	Biological Process	GO:2000548	negative regulation of dendritic cell dendrite assembly	0.0431156	0.228159	0	0	1	1
GO:2000616 negative regulation of histone H3-K9 acetylation	1	0.0431156	0.131	1	Biological Process	GO:2000616	negative regulation of histone H3-K9 acetylation	0.0431156	0.228159	0	0	1	1
GO:2000685 positive regulation of cellular response to X-ray	1	0.0431156	0.131	1	Biological Process	GO:2000685	positive regulation of cellular response to X-ray	0.0431156	0.228159	0	0	1	1
GO:2001108 positive regulation of Rho guanyl-nucleotide exchange factor activity	1	0.0431156	0.131	1	Biological Process	GO:2001108	positive regulation of Rho guanyl-nucleotide exchange factor activity	0.0431156	0.228159	0	0	1	1
GO:2001144 regulation of phosphatidylinositol-3,4,5-trisphosphate 5-phosphatase activity	1	0.0431156	0.131	1	Biological Process	GO:2001144	regulation of phosphatidylinositol-3,4,5-trisphosphate 5-phosphatase activity	0.0431156	0.228159	0	0	1	1
GO:2001145 negative regulation of phosphatidylinositol-3,4,5-trisphosphate 5-phosphatase activity	1	0.0431156	0.131	1	Biological Process	GO:2001145	negative regulation of phosphatidylinositol-3,4,5-trisphosphate 5-phosphatase activity	0.0431156	0.228159	0	0	1	1
GO:0031400 negative regulation of protein modification process	36	0.0433085	4.706	0.058	Biological Process	GO:0031400	negative regulation of protein modification process	0.0433085	0.228159	0	0	36	620
GO:0003197 endocardial cushion development	5	0.0433628	0.654	0.111	Biological Process	GO:0003197	endocardial cushion development	0.0433628	0.228159	0	0	5	45
GO:0008542 visual learning	5	0.0433628	0.654	0.111	Biological Process	GO:0008542	visual learning	0.0433628	0.228159	0	0	5	45
GO:0048701 embryonic cranial skeleton morphogenesis	5	0.0433628	0.654	0.111	Biological Process	GO:0048701	embryonic cranial skeleton morphogenesis	0.0433628	0.228159	0	0	5	45
GO:0050798 activated T cell proliferation	5	0.0433628	0.654	0.111	Biological Process	GO:0050798	activated T cell proliferation	0.0433628	0.228159	0	0	5	45
GO:0045936 negative regulation of phosphate metabolic process	34	0.0434208	4.444	0.059	Biological Process	GO:0045936	negative regulation of phosphate metabolic process	0.0434208	0.228159	0	0	34	580
GO:0030010 establishment of cell polarity	11	0.0434366	1.438	0.077	Biological Process	GO:0030010	establishment of cell polarity	0.0434366	0.228159	0	0	11	142
GO:0002062 chondrocyte differentiation	9	0.0436418	1.176	0.083	Biological Process	GO:0002062	chondrocyte differentiation	0.0436418	0.228159	0	0	9	108
GO:0002349 histamine production involved in inflammatory response	2	0.0437307	0.261	0.25	Biological Process	GO:0002349	histamine production involved in inflammatory response	0.0437307	0.228159	0	0	2	8
GO:0002441 histamine secretion involved in inflammatory response	2	0.0437307	0.261	0.25	Biological Process	GO:0002441	histamine secretion involved in inflammatory response	0.0437307	0.228159	0	0	2	8
GO:0002553 histamine secretion by mast cell	2	0.0437307	0.261	0.25	Biological Process	GO:0002553	histamine secretion by mast cell	0.0437307	0.228159	0	0	2	8
GO:0010501 RNA secondary structure unwinding	2	0.0437307	0.261	0.25	Biological Process	GO:0010501	RNA secondary structure unwinding	0.0437307	0.228159	0	0	2	8
GO:0010510 regulation of acetyl-CoA biosynthetic process from pyruvate	2	0.0437307	0.261	0.25	Biological Process	GO:0010510	regulation of acetyl-CoA biosynthetic process from pyruvate	0.0437307	0.228159	0	0	2	8
GO:0015014 heparan sulfate proteoglycan biosynthetic process, polysaccharide chain biosynthetic process	2	0.0437307	0.261	0.25	Biological Process	GO:0015014	heparan sulfate proteoglycan biosynthetic process, polysaccharide chain biosynthetic process	0.0437307	0.228159	0	0	2	8
GO:0019405 alditol catabolic process	2	0.0437307	0.261	0.25	Biological Process	GO:0019405	alditol catabolic process	0.0437307	0.228159	0	0	2	8
GO:0030223 neutrophil differentiation	2	0.0437307	0.261	0.25	Biological Process	GO:0030223	neutrophil differentiation	0.0437307	0.228159	0	0	2	8
GO:0031946 regulation of glucocorticoid biosynthetic process	2	0.0437307	0.261	0.25	Biological Process	GO:0031946	regulation of glucocorticoid biosynthetic process	0.0437307	0.228159	0	0	2	8
GO:0032119 sequestering of zinc ion	2	0.0437307	0.261	0.25	Biological Process	GO:0032119	sequestering of zinc ion	0.0437307	0.228159	0	0	2	8
GO:0035655 interleukin-18-mediated signaling pathway	2	0.0437307	0.261	0.25	Biological Process	GO:0035655	interleukin-18-mediated signaling pathway	0.0437307	0.228159	0	0	2	8
GO:0039536 negative regulation of RIG-I signaling pathway	2	0.0437307	0.261	0.25	Biological Process	GO:0039536	negative regulation of RIG-I signaling pathway	0.0437307	0.228159	0	0	2	8
GO:0043696 dedifferentiation	2	0.0437307	0.261	0.25	Biological Process	GO:0043696	dedifferentiation	0.0437307	0.228159	0	0	2	8
GO:0043697 cell dedifferentiation	2	0.0437307	0.261	0.25	Biological Process	GO:0043697	cell dedifferentiation	0.0437307	0.228159	0	0	2	8
GO:0048840 otolith development	2	0.0437307	0.261	0.25	Biological Process	GO:0048840	otolith development	0.0437307	0.228159	0	0	2	8
GO:0051045 negative regulation of membrane protein ectodomain proteolysis	2	0.0437307	0.261	0.25	Biological Process	GO:0051045	negative regulation of membrane protein ectodomain proteolysis	0.0437307	0.228159	0	0	2	8
GO:0060926 cardiac pacemaker cell development	2	0.0437307	0.261	0.25	Biological Process	GO:0060926	cardiac pacemaker cell development	0.0437307	0.228159	0	0	2	8
GO:0061051 positive regulation of cell growth involved in cardiac muscle cell development	2	0.0437307	0.261	0.25	Biological Process	GO:0061051	positive regulation of cell growth involved in cardiac muscle cell development	0.0437307	0.228159	0	0	2	8
GO:0070244 negative regulation of thymocyte apoptotic process	2	0.0437307	0.261	0.25	Biological Process	GO:0070244	negative regulation of thymocyte apoptotic process	0.0437307	0.228159	0	0	2	8
GO:0071351 cellular response to interleukin-18	2	0.0437307	0.261	0.25	Biological Process	GO:0071351	cellular response to interleukin-18	0.0437307	0.228159	0	0	2	8
GO:0071389 cellular response to mineralocorticoid stimulus	2	0.0437307	0.261	0.25	Biological Process	GO:0071389	cellular response to mineralocorticoid stimulus	0.0437307	0.228159	0	0	2	8
GO:0071676 negative regulation of mononuclear cell migration	2	0.0437307	0.261	0.25	Biological Process	GO:0071676	negative regulation of mononuclear cell migration	0.0437307	0.228159	0	0	2	8
GO:0072172 mesonephric tubule formation	2	0.0437307	0.261	0.25	Biological Process	GO:0072172	mesonephric tubule formation	0.0437307	0.228159	0	0	2	8
GO:0072239 metanephric glomerulus vasculature development	2	0.0437307	0.261	0.25	Biological Process	GO:0072239	metanephric glomerulus vasculature development	0.0437307	0.228159	0	0	2	8
GO:0072282 metanephric nephron tubule morphogenesis	2	0.0437307	0.261	0.25	Biological Process	GO:0072282	metanephric nephron tubule morphogenesis	0.0437307	0.228159	0	0	2	8
GO:0090400 stress-induced premature senescence	2	0.0437307	0.261	0.25	Biological Process	GO:0090400	stress-induced premature senescence	0.0437307	0.228159	0	0	2	8
GO:0097049 motor neuron apoptotic process	2	0.0437307	0.261	0.25	Biological Process	GO:0097049	motor neuron apoptotic process	0.0437307	0.228159	0	0	2	8
GO:0097527 necroptotic signaling pathway	2	0.0437307	0.261	0.25	Biological Process	GO:0097527	necroptotic signaling pathway	0.0437307	0.228159	0	0	2	8
GO:0150012 positive regulation of neuron projection arborization	2	0.0437307	0.261	0.25	Biological Process	GO:0150012	positive regulation of neuron projection arborization	0.0437307	0.228159	0	0	2	8
GO:1905247 positive regulation of aspartic-type peptidase activity	2	0.0437307	0.261	0.25	Biological Process	GO:1905247	positive regulation of aspartic-type peptidase activity	0.0437307	0.228159	0	0	2	8
GO:2000288 positive regulation of myoblast proliferation	2	0.0437307	0.261	0.25	Biological Process	GO:2000288	positive regulation of myoblast proliferation	0.0437307	0.228159	0	0	2	8
GO:2000643 positive regulation of early endosome to late endosome transport	2	0.0437307	0.261	0.25	Biological Process	GO:2000643	positive regulation of early endosome to late endosome transport	0.0437307	0.228159	0	0	2	8
GO:2000969 positive regulation of AMPA receptor activity	2	0.0437307	0.261	0.25	Biological Process	GO:2000969	positive regulation of AMPA receptor activity	0.0437307	0.228159	0	0	2	8
GO:0006352 DNA-templated transcription, initiation	19	0.0440852	2.484	0.066	Biological Process	GO:0006352	DNA-templated transcription, initiation	0.0440852	0.229763	0	0	19	288
GO:1901135 carbohydrate derivative metabolic process	68	0.0441036	8.889	0.053	Biological Process	GO:1901135	carbohydrate derivative metabolic process	0.0441036	0.229763	0	0	68	1283
GO:0010563 negative regulation of phosphorus metabolic process	34	0.0443004	4.444	0.059	Biological Process	GO:0010563	negative regulation of phosphorus metabolic process	0.0443004	0.230618	0	0	34	581
GO:0006812 cation transport	63	0.0448954	8.235	0.053	Biological Process	GO:0006812	cation transport	0.0448954	0.233542	0	0	63	1179
GO:0008015 blood circulation	31	0.0451043	4.052	0.059	Biological Process	GO:0008015	blood circulation	0.0451043	0.234456	0	0	31	522
GO:0072395 signal transduction involved in cell cycle checkpoint	7	0.0452079	0.915	0.092	Biological Process	GO:0072395	signal transduction involved in cell cycle checkpoint	0.0452079	0.234821	0	0	7	76
GO:0032355 response to estradiol	11	0.0453108	1.438	0.077	Biological Process	GO:0032355	response to estradiol	0.0453108	0.235008	0	0	11	143
GO:0072006 nephron development	11	0.0453108	1.438	0.077	Biological Process	GO:0072006	nephron development	0.0453108	0.235008	0	0	11	143
GO:0031503 protein-containing complex localization	19	0.0453727	2.484	0.066	Biological Process	GO:0031503	protein-containing complex localization	0.0453727	0.235156	0	0	19	289
GO:0051641 cellular localization	148	0.0461736	19.346	0.049	Biological Process	GO:0051641	cellular localization	0.0461736	0.238389	0	0	148	3020
GO:0006448 regulation of translational elongation	3	0.0462339	0.392	0.158	Biological Process	GO:0006448	regulation of translational elongation	0.0462339	0.238389	0	0	3	19
GO:0009148 pyrimidine nucleoside triphosphate biosynthetic process	3	0.0462339	0.392	0.158	Biological Process	GO:0009148	pyrimidine nucleoside triphosphate biosynthetic process	0.0462339	0.238389	0	0	3	19
GO:0043652 engulfment of apoptotic cell	3	0.0462339	0.392	0.158	Biological Process	GO:0043652	engulfment of apoptotic cell	0.0462339	0.238389	0	0	3	19
GO:0045116 protein neddylation	3	0.0462339	0.392	0.158	Biological Process	GO:0045116	protein neddylation	0.0462339	0.238389	0	0	3	19
GO:0090190 positive regulation of branching involved in ureteric bud morphogenesis	3	0.0462339	0.392	0.158	Biological Process	GO:0090190	positive regulation of branching involved in ureteric bud morphogenesis	0.0462339	0.238389	0	0	3	19
GO:1903729 regulation of plasma membrane organization	3	0.0462339	0.392	0.158	Biological Process	GO:1903729	regulation of plasma membrane organization	0.0462339	0.238389	0	0	3	19
GO:0010952 positive regulation of peptidase activity	14	0.0463462	1.83	0.071	Biological Process	GO:0010952	positive regulation of peptidase activity	0.0463462	0.238793	0	0	14	197
GO:0010950 positive regulation of endopeptidase activity	13	0.0464187	1.699	0.073	Biological Process	GO:0010950	positive regulation of endopeptidase activity	0.0464187	0.238817	0	0	13	179
GO:0051897 positive regulation of protein kinase B signaling	13	0.0464187	1.699	0.073	Biological Process	GO:0051897	positive regulation of protein kinase B signaling	0.0464187	0.238817	0	0	13	179
GO:0048872 homeostasis of number of cells	18	0.0464749	2.353	0.066	Biological Process	GO:0048872	homeostasis of number of cells	0.0464749	0.238931	0	0	18	271
GO:0048806 genitalia development	5	0.0469958	0.654	0.109	Biological Process	GO:0048806	genitalia development	0.0469958	0.241163	0	0	5	46
GO:0032102 negative regulation of response to external stimulus	31	0.0470337	4.052	0.059	Biological Process	GO:0032102	negative regulation of response to external stimulus	0.0470337	0.241163	0	0	31	524
GO:0030520 intracellular estrogen receptor signaling pathway	6	0.0470462	0.784	0.098	Biological Process	GO:0030520	intracellular estrogen receptor signaling pathway	0.0470462	0.241163	0	0	6	61
GO:0035019 somatic stem cell population maintenance	6	0.0470462	0.784	0.098	Biological Process	GO:0035019	somatic stem cell population maintenance	0.0470462	0.241163	0	0	6	61
GO:0072655 establishment of protein localization to mitochondrion	11	0.0472397	1.438	0.076	Biological Process	GO:0072655	establishment of protein localization to mitochondrion	0.0472397	0.241349	0	0	11	144
GO:0001938 positive regulation of endothelial cell proliferation	8	0.0473358	1.046	0.086	Biological Process	GO:0001938	positive regulation of endothelial cell proliferation	0.0473358	0.241349	0	0	8	93
GO:0010717 regulation of epithelial to mesenchymal transition	8	0.0473358	1.046	0.086	Biological Process	GO:0010717	regulation of epithelial to mesenchymal transition	0.0473358	0.241349	0	0	8	93
GO:0046620 regulation of organ growth	8	0.0473358	1.046	0.086	Biological Process	GO:0046620	regulation of organ growth	0.0473358	0.241349	0	0	8	93
GO:0000737 DNA catabolic process, endonucleolytic	4	0.047357	0.523	0.125	Biological Process	GO:0000737	DNA catabolic process, endonucleolytic	0.047357	0.241349	0	0	4	32
GO:0002828 regulation of type 2 immune response	4	0.047357	0.523	0.125	Biological Process	GO:0002828	regulation of type 2 immune response	0.047357	0.241349	0	0	4	32
GO:0035883 enteroendocrine cell differentiation	4	0.047357	0.523	0.125	Biological Process	GO:0035883	enteroendocrine cell differentiation	0.047357	0.241349	0	0	4	32
GO:0055023 positive regulation of cardiac muscle tissue growth	4	0.047357	0.523	0.125	Biological Process	GO:0055023	positive regulation of cardiac muscle tissue growth	0.047357	0.241349	0	0	4	32
GO:0048678 response to axon injury	7	0.0479634	0.915	0.091	Biological Process	GO:0048678	response to axon injury	0.0479634	0.244263	0	0	7	77
GO:0061387 regulation of extent of cell growth	9	0.0481019	1.176	0.082	Biological Process	GO:0061387	regulation of extent of cell growth	0.0481019	0.244614	0	0	9	110
GO:0090100 positive regulation of transmembrane receptor protein serine/threonine kinase signaling pathway	9	0.0481019	1.176	0.082	Biological Process	GO:0090100	positive regulation of transmembrane receptor protein serine/threonine kinase signaling pathway	0.0481019	0.244614	0	0	9	110
GO:0007389 pattern specification process	27	0.0483028	3.529	0.061	Biological Process	GO:0007389	pattern specification process	0.0483028	0.245458	0	0	27	446
GO:0008016 regulation of heart contraction	16	0.0483944	2.092	0.068	Biological Process	GO:0008016	regulation of heart contraction	0.0483944	0.245746	0	0	16	235
GO:0002573 myeloid leukocyte differentiation	15	0.0491396	1.961	0.069	Biological Process	GO:0002573	myeloid leukocyte differentiation	0.0491396	0.24935	0	0	15	217
GO:0006935 chemotaxis	37	0.0492773	4.837	0.057	Biological Process	GO:0006935	chemotaxis	0.0492773	0.249868	0	0	37	647
GO:0032409 regulation of transporter activity	19	0.0493971	2.484	0.065	Biological Process	GO:0032409	regulation of transporter activity	0.0493971	0.250295	0	0	19	292
GO:0006974 cellular response to DNA damage stimulus	49	0.0499833	6.405	0.055	Biological Process	GO:0006974	cellular response to DNA damage stimulus	0.0499833	0.253083	0	0	49	894
GO:1902911 protein kinase complex	17	1.65848e-06	2.16	0.163	Cellular Component	GO:1902911	protein kinase complex	1.65848e-06	0.00143292	0	0	17	104
GO:0000785 chromatin	82	2.76843e-05	10.419	0.067	Cellular Component	GO:0000785	chromatin	2.76843e-05	0.0107461	0	0	82	1230
GO:0005654 nucleoplasm	222	3.73128e-05	28.208	0.054	Cellular Component	GO:0005654	nucleoplasm	3.73128e-05	0.0107461	0	0	222	4134
GO:0031981 nuclear lumen	236	7.96186e-05	29.987	0.053	Cellular Component	GO:0031981	nuclear lumen	7.96186e-05	0.0171976	0	0	236	4489
GO:0031974 membrane-enclosed lumen	284	0.000178806	36.086	0.051	Cellular Component	GO:0031974	membrane-enclosed lumen	0.000178806	0.0220698	0	0	284	5615
GO:0043233 organelle lumen	284	0.000178806	36.086	0.051	Cellular Component	GO:0043233	organelle lumen	0.000178806	0.0220698	0	0	284	5615
GO:0070013 intracellular organelle lumen	284	0.000178806	36.086	0.051	Cellular Component	GO:0070013	intracellular organelle lumen	0.000178806	0.0220698	0	0	284	5615
GO:0044446 intracellular organelle part	474	0.000308555	60.229	0.047	Cellular Component	GO:0044446	intracellular organelle part	0.000308555	0.0279654	0	0	474	10077
GO:0043227 membrane-bounded organelle	584	0.000317949	74.206	0.046	Cellular Component	GO:0043227	membrane-bounded organelle	0.000317949	0.0279654	0	0	584	12764
GO:1902554 serine/threonine protein kinase complex	12	0.000327401	1.525	0.136	Cellular Component	GO:1902554	serine/threonine protein kinase complex	0.000327401	0.0279654	0	0	12	88
GO:0016605 PML body	13	0.00036888	1.652	0.127	Cellular Component	GO:0016605	PML body	0.00036888	0.0279654	0	0	13	102
GO:0000307 cyclin-dependent protein kinase holoenzyme complex	8	0.000388408	1.017	0.186	Cellular Component	GO:0000307	cyclin-dependent protein kinase holoenzyme complex	0.000388408	0.0279654	0	0	8	43
GO:0044420 extracellular matrix component	9	0.000531464	1.144	0.161	Cellular Component	GO:0044420	extracellular matrix component	0.000531464	0.0353219	0	0	9	56
GO:0044422 organelle part	483	0.000811469	61.372	0.047	Cellular Component	GO:0044422	organelle part	0.000811469	0.0500792	0	0	483	10381
GO:0044428 nuclear part	245	0.000884847	31.131	0.05	Cellular Component	GO:0044428	nuclear part	0.000884847	0.0509672	0	0	245	4867
GO:0061695 transferase complex, transferring phosphorus-containing groups	23	0.000987514	2.922	0.086	Cellular Component	GO:0061695	transferase complex, transferring phosphorus-containing groups	0.000987514	0.0533258	0	0	23	266
GO:0044427 chromosomal part	94	0.00127178	11.944	0.058	Cellular Component	GO:0044427	chromosomal part	0.00127178	0.0645849	0	0	94	1631
GO:0005634 nucleus	363	0.00134552	46.125	0.048	Cellular Component	GO:0005634	nucleus	0.00134552	0.0645849	0	0	363	7597
GO:0098644 complex of collagen trimers	5	0.0015552	0.635	0.238	Cellular Component	GO:0098644	complex of collagen trimers	0.0015552	0.0707208	0	0	5	21
GO:0005584 collagen type I trimer	2	0.00179216	0.254	1	Cellular Component	GO:0005584	collagen type I trimer	0.00179216	0.0774212	0	0	2	2
GO:0043235 receptor complex	31	0.00193985	3.939	0.074	Cellular Component	GO:0043235	receptor complex	0.00193985	0.0781614	0	0	31	419
GO:0098588 bounding membrane of organelle	119	0.00199022	15.121	0.055	Cellular Component	GO:0098588	bounding membrane of organelle	0.00199022	0.0781614	0	0	119	2178
GO:0036477 somatodendritic compartment	55	0.00219711	6.989	0.063	Cellular Component	GO:0036477	somatodendritic compartment	0.00219711	0.082535	0	0	55	874
GO:1990234 transferase complex	50	0.00346502	6.353	0.063	Cellular Component	GO:1990234	transferase complex	0.00346502	0.124741	0	0	50	795
GO:0005694 chromosome	99	0.00411553	12.579	0.055	Cellular Component	GO:0005694	chromosome	0.00411553	0.142233	0	0	99	1802
GO:0098805 whole membrane	97	0.00446168	12.325	0.055	Cellular Component	GO:0098805	whole membrane	0.00446168	0.148265	0	0	97	1765
GO:0031090 organelle membrane	155	0.0049087	19.695	0.051	Cellular Component	GO:0031090	organelle membrane	0.0049087	0.153579	0	0	155	3017
GO:0035985 senescence-associated heterochromatin focus	2	0.00522501	0.254	0.667	Cellular Component	GO:0035985	senescence-associated heterochromatin focus	0.00522501	0.153579	0	0	2	3
GO:0098651 basement membrane collagen trimer	3	0.00525041	0.381	0.333	Cellular Component	GO:0098651	basement membrane collagen trimer	0.00525041	0.153579	0	0	3	9
GO:0035770 ribonucleoprotein granule	20	0.0054235	2.541	0.079	Cellular Component	GO:0035770	ribonucleoprotein granule	0.0054235	0.153579	0	0	20	252
GO:0097458 neuron part	99	0.0056406	12.579	0.054	Cellular Component	GO:0097458	neuron part	0.0056406	0.153579	0	0	99	1822
GO:0043005 neuron projection	78	0.00576085	9.911	0.056	Cellular Component	GO:0043005	neuron projection	0.00576085	0.153579	0	0	78	1384
GO:0030424 axon	42	0.00593258	5.337	0.064	Cellular Component	GO:0030424	axon	0.00593258	0.153579	0	0	42	661
GO:0000159 protein phosphatase type 2A complex	4	0.00607835	0.508	0.222	Cellular Component	GO:0000159	protein phosphatase type 2A complex	0.00607835	0.153579	0	0	4	18
GO:0036464 cytoplasmic ribonucleoprotein granule	19	0.00622137	2.414	0.08	Cellular Component	GO:0036464	cytoplasmic ribonucleoprotein granule	0.00622137	0.153579	0	0	19	238
GO:0030315 T-tubule	7	0.00673212	0.889	0.132	Cellular Component	GO:0030315	T-tubule	0.00673212	0.161324	0	0	7	53
GO:0005581 collagen trimer	10	0.00690854	1.271	0.105	Cellular Component	GO:0005581	collagen trimer	0.00690854	0.161324	0	0	10	95
GO:0043231 intracellular membrane-bounded organelle	511	0.00898096	64.93	0.045	Cellular Component	GO:0043231	intracellular membrane-bounded organelle	0.00898096	0.18671	0	0	511	11307
GO:0098685 Schaffer collateral - CA1 synapse	9	0.00905867	1.144	0.107	Cellular Component	GO:0098685	Schaffer collateral - CA1 synapse	0.00905867	0.18671	0	0	9	84
GO:0032590 dendrite membrane	6	0.00907053	0.762	0.14	Cellular Component	GO:0032590	dendrite membrane	0.00907053	0.18671	0	0	6	43
GO:1905348 endonuclease complex	5	0.00915858	0.635	0.161	Cellular Component	GO:1905348	endonuclease complex	0.00915858	0.18671	0	0	5	31
GO:0030425 dendrite	40	0.00950815	5.083	0.062	Cellular Component	GO:0030425	dendrite	0.00950815	0.18671	0	0	40	641
GO:0098794 postsynapse	40	0.00950815	5.083	0.062	Cellular Component	GO:0098794	postsynapse	0.00950815	0.18671	0	0	40	641
GO:1990124 messenger ribonucleoprotein complex	3	0.00967969	0.381	0.273	Cellular Component	GO:1990124	messenger ribonucleoprotein complex	0.00967969	0.18671	0	0	3	11
GO:0097447 dendritic tree	40	0.0099811	5.083	0.062	Cellular Component	GO:0097447	dendritic tree	0.0099811	0.18671	0	0	40	643
GO:0005899 insulin receptor complex	2	0.0101567	0.254	0.5	Cellular Component	GO:0005899	insulin receptor complex	0.0101567	0.18671	0	0	2	4
GO:0035867 alphav-beta3 integrin-IGF-1-IGF1R complex	2	0.0101567	0.254	0.5	Cellular Component	GO:0035867	alphav-beta3 integrin-IGF-1-IGF1R complex	0.0101567	0.18671	0	0	2	4
GO:0030054 cell junction	76	0.0123737	9.657	0.055	Cellular Component	GO:0030054	cell junction	0.0123737	0.216084	0	0	76	1388
GO:0005583 fibrillar collagen trimer	3	0.0125049	0.381	0.25	Cellular Component	GO:0005583	fibrillar collagen trimer	0.0125049	0.216084	0	0	3	12
GO:0098643 banded collagen fibril	3	0.0125049	0.381	0.25	Cellular Component	GO:0098643	banded collagen fibril	0.0125049	0.216084	0	0	3	12
GO:0043226 organelle	615	0.0135605	78.145	0.044	Cellular Component	GO:0043226	organelle	0.0135605	0.22973	0	0	615	13892
GO:0032589 neuron projection membrane	7	0.0142655	0.889	0.115	Cellular Component	GO:0032589	neuron projection membrane	0.0142655	0.237026	0	0	7	61
GO:0032580 Golgi cisterna membrane	9	0.0148813	1.144	0.099	Cellular Component	GO:0032580	Golgi cisterna membrane	0.0148813	0.242593	0	0	9	91
GO:0010494 cytoplasmic stress granule	8	0.0160478	1.017	0.104	Cellular Component	GO:0010494	cytoplasmic stress granule	0.0160478	0.256463	0	0	8	77
GO:0042383 sarcolemma	12	0.016774	1.525	0.085	Cellular Component	GO:0042383	sarcolemma	0.016774	0.256463	0	0	12	141
GO:0000932 P-body	9	0.0169618	1.144	0.097	Cellular Component	GO:0000932	P-body	0.0169618	0.256463	0	0	9	93
GO:0045211 postsynaptic membrane	20	0.0173302	2.541	0.071	Cellular Component	GO:0045211	postsynaptic membrane	0.0173302	0.256463	0	0	20	282
GO:0044424 intracellular part	651	0.0176455	82.719	0.044	Cellular Component	GO:0044424	intracellular part	0.0176455	0.256463	0	0	651	14816
GO:0045202 synapse	73	0.0177402	9.276	0.054	Cellular Component	GO:0045202	synapse	0.0177402	0.256463	0	0	73	1348
GO:0005622 intracellular	651	0.0178099	82.719	0.044	Cellular Component	GO:0005622	intracellular	0.0178099	0.256463	0	0	651	14817
GO:0016442 RISC complex	3	0.0194274	0.381	0.214	Cellular Component	GO:0016442	RISC complex	0.0194274	0.27073	0	0	3	14
GO:0031332 RNAi effector complex	3	0.0194274	0.381	0.214	Cellular Component	GO:0031332	RNAi effector complex	0.0194274	0.27073	0	0	3	14
GO:0010008 endosome membrane	32	0.0225805	4.066	0.062	Cellular Component	GO:0010008	endosome membrane	0.0225805	0.304862	0	0	32	520
GO:0005813 centrosome	37	0.0229754	4.701	0.06	Cellular Component	GO:0005813	centrosome	0.0229754	0.304862	0	0	37	620
GO:0030673 axolemma	3	0.0235343	0.381	0.2	Cellular Component	GO:0030673	axolemma	0.0235343	0.304862	0	0	3	15
GO:0043229 intracellular organelle	580	0.0238795	73.698	0.044	Cellular Component	GO:0043229	intracellular organelle	0.0238795	0.304862	0	0	580	13100
GO:0005593 FACIT collagen trimer	2	0.0239938	0.254	0.333	Cellular Component	GO:0005593	FACIT collagen trimer	0.0239938	0.304862	0	0	2	6
GO:0070937 CRD-mediated mRNA stability complex	2	0.0239938	0.254	0.333	Cellular Component	GO:0070937	CRD-mediated mRNA stability complex	0.0239938	0.304862	0	0	2	6
GO:0031252 cell leading edge	27	0.024747	3.431	0.063	Cellular Component	GO:0031252	cell leading edge	0.024747	0.309875	0	0	27	426
GO:0032809 neuronal cell body membrane	4	0.0258201	0.508	0.148	Cellular Component	GO:0032809	neuronal cell body membrane	0.0258201	0.312516	0	0	4	27
GO:0014704 intercalated disc	6	0.026043	0.762	0.111	Cellular Component	GO:0014704	intercalated disc	0.026043	0.312516	0	0	6	54
GO:0032154 cleavage furrow	6	0.026043	0.762	0.111	Cellular Component	GO:0032154	cleavage furrow	0.026043	0.312516	0	0	6	54
GO:0044433 cytoplasmic vesicle part	81	0.0275213	10.292	0.052	Cellular Component	GO:0044433	cytoplasmic vesicle part	0.0275213	0.325731	0	0	81	1549
GO:0044309 neuron spine	14	0.0304894	1.779	0.074	Cellular Component	GO:0044309	neuron spine	0.0304894	0.329718	0	0	14	189
GO:0016592 mediator complex	5	0.0313876	0.635	0.119	Cellular Component	GO:0016592	mediator complex	0.0313876	0.329718	0	0	5	42
GO:0014069 postsynaptic density	22	0.0318448	2.795	0.065	Cellular Component	GO:0014069	postsynaptic density	0.0318448	0.329718	0	0	22	339
GO:0005587 collagen type IV trimer	2	0.0326586	0.254	0.286	Cellular Component	GO:0005587	collagen type IV trimer	0.0326586	0.329718	0	0	2	7
GO:0030868 smooth endoplasmic reticulum membrane	2	0.0326586	0.254	0.286	Cellular Component	GO:0030868	smooth endoplasmic reticulum membrane	0.0326586	0.329718	0	0	2	7
GO:0048179 activin receptor complex	2	0.0326586	0.254	0.286	Cellular Component	GO:0048179	activin receptor complex	0.0326586	0.329718	0	0	2	7
GO:0097425 smooth endoplasmic reticulum part	2	0.0326586	0.254	0.286	Cellular Component	GO:0097425	smooth endoplasmic reticulum part	0.0326586	0.329718	0	0	2	7
GO:0001518 voltage-gated sodium channel complex	3	0.0330408	0.381	0.176	Cellular Component	GO:0001518	voltage-gated sodium channel complex	0.0330408	0.329718	0	0	3	17
GO:0044298 cell body membrane	4	0.0365171	0.508	0.133	Cellular Component	GO:0044298	cell body membrane	0.0365171	0.329718	0	0	4	30
GO:1902555 endoribonuclease complex	4	0.0365171	0.508	0.133	Cellular Component	GO:1902555	endoribonuclease complex	0.0365171	0.329718	0	0	4	30
GO:0032279 asymmetric synapse	22	0.0375524	2.795	0.064	Cellular Component	GO:0032279	asymmetric synapse	0.0375524	0.329718	0	0	22	345
GO:0005923 bicellular tight junction	10	0.037899	1.271	0.081	Cellular Component	GO:0005923	bicellular tight junction	0.037899	0.329718	0	0	10	124
GO:0000792 heterochromatin	7	0.0392999	0.889	0.093	Cellular Component	GO:0000792	heterochromatin	0.0392999	0.329718	0	0	7	75
GO:0044440 endosomal part	33	0.0401601	4.193	0.058	Cellular Component	GO:0044440	endosomal part	0.0401601	0.329718	0	0	33	566
GO:0044665 MLL1/2 complex	4	0.0405702	0.508	0.129	Cellular Component	GO:0044665	MLL1/2 complex	0.0405702	0.329718	0	0	4	31
GO:0048787 presynaptic active zone membrane	4	0.0405702	0.508	0.129	Cellular Component	GO:0048787	presynaptic active zone membrane	0.0405702	0.329718	0	0	4	31
GO:0071339 MLL1 complex	4	0.0405702	0.508	0.129	Cellular Component	GO:0071339	MLL1 complex	0.0405702	0.329718	0	0	4	31
GO:0030496 midbody	14	0.0410588	1.779	0.071	Cellular Component	GO:0030496	midbody	0.0410588	0.329718	0	0	14	197
GO:0005667 transcription factor complex	23	0.0412348	2.922	0.062	Cellular Component	GO:0005667	transcription factor complex	0.0412348	0.329718	0	0	23	368
GO:0098642 network-forming collagen trimer	2	0.0423404	0.254	0.25	Cellular Component	GO:0098642	network-forming collagen trimer	0.0423404	0.329718	0	0	2	8
GO:0098645 collagen network	2	0.0423404	0.254	0.25	Cellular Component	GO:0098645	collagen network	0.0423404	0.329718	0	0	2	8
GO:0005582 collagen type XV trimer	1	0.0423597	0.127	1	Cellular Component	GO:0005582	collagen type XV trimer	0.0423597	0.329718	0	0	1	1
GO:0005596 collagen type XIV trimer	1	0.0423597	0.127	1	Cellular Component	GO:0005596	collagen type XIV trimer	0.0423597	0.329718	0	0	1	1
GO:0005969 serine-pyruvate aminotransferase complex	1	0.0423597	0.127	1	Cellular Component	GO:0005969	serine-pyruvate aminotransferase complex	0.0423597	0.329718	0	0	1	1
GO:0017122 protein N-acetylglucosaminyltransferase complex	1	0.0423597	0.127	1	Cellular Component	GO:0017122	protein N-acetylglucosaminyltransferase complex	0.0423597	0.329718	0	0	1	1
GO:0031207 Sec62/Sec63 complex	1	0.0423597	0.127	1	Cellular Component	GO:0031207	Sec62/Sec63 complex	0.0423597	0.329718	0	0	1	1
GO:0034506 chromosome, centromeric core domain	1	0.0423597	0.127	1	Cellular Component	GO:0034506	chromosome, centromeric core domain	0.0423597	0.329718	0	0	1	1
GO:0034752 cytosolic aryl hydrocarbon receptor complex	1	0.0423597	0.127	1	Cellular Component	GO:0034752	cytosolic aryl hydrocarbon receptor complex	0.0423597	0.329718	0	0	1	1
GO:0044797 cytoplasmic transcription factor complex	1	0.0423597	0.127	1	Cellular Component	GO:0044797	cytoplasmic transcription factor complex	0.0423597	0.329718	0	0	1	1
GO:0061831 apical ectoplasmic specialization	1	0.0423597	0.127	1	Cellular Component	GO:0061831	apical ectoplasmic specialization	0.0423597	0.329718	0	0	1	1
GO:0090730 Las1 complex	1	0.0423597	0.127	1	Cellular Component	GO:0090730	Las1 complex	0.0423597	0.329718	0	0	1	1
GO:0099192 cerebellar Golgi cell to granule cell synapse	1	0.0423597	0.127	1	Cellular Component	GO:0099192	cerebellar Golgi cell to granule cell synapse	0.0423597	0.329718	0	0	1	1
GO:0110070 cellularization cleavage furrow	1	0.0423597	0.127	1	Cellular Component	GO:0110070	cellularization cleavage furrow	0.0423597	0.329718	0	0	1	1
GO:0120095 vacuole-isolation membrane contact site	1	0.0423597	0.127	1	Cellular Component	GO:0120095	vacuole-isolation membrane contact site	0.0423597	0.329718	0	0	1	1
GO:1905347 endodeoxyribonuclease complex	1	0.0423597	0.127	1	Cellular Component	GO:1905347	endodeoxyribonuclease complex	0.0423597	0.329718	0	0	1	1
GO:1990674 Golgi cis cisterna membrane	1	0.0423597	0.127	1	Cellular Component	GO:1990674	Golgi cis cisterna membrane	0.0423597	0.329718	0	0	1	1
GO:1990675 Golgi medial cisterna membrane	1	0.0423597	0.127	1	Cellular Component	GO:1990675	Golgi medial cisterna membrane	0.0423597	0.329718	0	0	1	1
GO:1990676 Golgi trans cisterna membrane	1	0.0423597	0.127	1	Cellular Component	GO:1990676	Golgi trans cisterna membrane	0.0423597	0.329718	0	0	1	1
GO:0016363 nuclear matrix	9	0.0438776	1.144	0.082	Cellular Component	GO:0016363	nuclear matrix	0.0438776	0.338484	0	0	9	110
GO:0098984 neuron to neuron synapse	23	0.0444805	2.922	0.062	Cellular Component	GO:0098984	neuron to neuron synapse	0.0444805	0.340099	0	0	23	371
GO:0005788 endoplasmic reticulum lumen	20	0.0449537	2.541	0.064	Cellular Component	GO:0005788	endoplasmic reticulum lumen	0.0449537	0.340701	0	0	20	313
GO:0098839 postsynaptic density membrane	8	0.0458158	1.017	0.085	Cellular Component	GO:0098839	postsynaptic density membrane	0.0458158	0.343036	0	0	8	94
GO:0043296 apical junction complex	11	0.0462408	1.398	0.075	Cellular Component	GO:0043296	apical junction complex	0.0462408	0.343036	0	0	11	146
GO:0044297 cell body	34	0.0467831	4.32	0.057	Cellular Component	GO:0044297	cell body	0.0467831	0.343036	0	0	34	594
GO:0032155 cell division site part	6	0.0468498	0.762	0.097	Cellular Component	GO:0032155	cell division site part	0.0468498	0.343036	0	0	6	62
GO:0000987 proximal promoter sequence-specific DNA binding	85	2.94849e-06	10.773	0.071	Molecular Function	GO:0000987	proximal promoter sequence-specific DNA binding	2.94849e-06	0.0022044	0	0	85	1199
GO:0000978 RNA polymerase II proximal promoter sequence-specific DNA binding	84	3.29015e-06	10.646	0.071	Molecular Function	GO:0000978	RNA polymerase II proximal promoter sequence-specific DNA binding	3.29015e-06	0.0022044	0	0	84	1184
GO:0030020 extracellular matrix structural constituent conferring tensile strength	10	6.61499e-06	1.267	0.244	Molecular Function	GO:0030020	extracellular matrix structural constituent conferring tensile strength	6.61499e-06	0.00226705	0	0	10	41
GO:0000977 RNA polymerase II regulatory region sequence-specific DNA binding	94	8.45915e-06	11.914	0.067	Molecular Function	GO:0000977	RNA polymerase II regulatory region sequence-specific DNA binding	8.45915e-06	0.00226705	0	0	94	1401
GO:0001012 RNA polymerase II regulatory region DNA binding	94	8.45915e-06	11.914	0.067	Molecular Function	GO:0001012	RNA polymerase II regulatory region DNA binding	8.45915e-06	0.00226705	0	0	94	1401
GO:0000981 DNA-binding transcription factor activity, RNA polymerase II-specific	91	1.36718e-05	11.534	0.067	Molecular Function	GO:0000981	DNA-binding transcription factor activity, RNA polymerase II-specific	1.36718e-05	0.00305336	0	0	91	1361
GO:0000976 transcription regulatory region sequence-specific DNA binding	97	2.39312e-05	12.294	0.065	Molecular Function	GO:0000976	transcription regulatory region sequence-specific DNA binding	2.39312e-05	0.00406246	0	0	97	1496
GO:0044212 transcription regulatory region DNA binding	97	2.58943e-05	12.294	0.065	Molecular Function	GO:0044212	transcription regulatory region DNA binding	2.58943e-05	0.00406246	0	0	97	1499
GO:0001067 regulatory region nucleic acid binding	97	2.72852e-05	12.294	0.065	Molecular Function	GO:0001067	regulatory region nucleic acid binding	2.72852e-05	0.00406246	0	0	97	1501
GO:0003700 DNA-binding transcription factor activity	92	3.96801e-05	11.66	0.065	Molecular Function	GO:0003700	DNA-binding transcription factor activity	3.96801e-05	0.00515682	0	0	92	1419
GO:0140110 transcription regulator activity	119	4.23321e-05	15.082	0.061	Molecular Function	GO:0140110	transcription regulator activity	4.23321e-05	0.00515682	0	0	119	1951
GO:1990837 sequence-specific double-stranded DNA binding	99	5.0464e-05	12.548	0.063	Molecular Function	GO:1990837	sequence-specific double-stranded DNA binding	5.0464e-05	0.00561434	0	0	99	1564
GO:0043565 sequence-specific DNA binding	104	5.44675e-05	13.181	0.062	Molecular Function	GO:0043565	sequence-specific DNA binding	5.44675e-05	0.00561434	0	0	104	1665
GO:0097602 cullin family protein binding	7	8.32706e-05	0.887	0.269	Molecular Function	GO:0097602	cullin family protein binding	8.32706e-05	0.00797018	0	0	7	26
GO:0005488 binding	749	0.000100386	94.93	0.044	Molecular Function	GO:0005488	binding	0.000100386	0.00896782	0	0	749	16838
GO:0005515 protein binding	673	0.000128698	85.298	0.046	Molecular Function	GO:0005515	protein binding	0.000128698	0.0107784	0	0	673	14787
GO:0030291 protein serine/threonine kinase inhibitor activity	7	0.000416305	0.887	0.212	Molecular Function	GO:0030291	protein serine/threonine kinase inhibitor activity	0.000416305	0.0310159	0	0	7	33
GO:0003690 double-stranded DNA binding	99	0.000416632	12.548	0.06	Molecular Function	GO:0003690	double-stranded DNA binding	0.000416632	0.0310159	0	0	99	1657
GO:0003677 DNA binding	139	0.000507315	17.617	0.056	Molecular Function	GO:0003677	DNA binding	0.000507315	0.0356739	0	0	139	2487
GO:0001094 TFIID-class transcription factor complex binding	4	0.000571739	0.507	0.4	Molecular Function	GO:0001094	TFIID-class transcription factor complex binding	0.000571739	0.0356739	0	0	4	10
GO:0008330 protein tyrosine/threonine phosphatase activity	4	0.000571739	0.507	0.4	Molecular Function	GO:0008330	protein tyrosine/threonine phosphatase activity	0.000571739	0.0356739	0	0	4	10
GO:0140096 catalytic activity, acting on a protein	127	0.000585691	16.096	0.057	Molecular Function	GO:0140096	catalytic activity, acting on a protein	0.000585691	0.0356739	0	0	127	2246
GO:0004860 protein kinase inhibitor activity	10	0.000679636	1.267	0.145	Molecular Function	GO:0004860	protein kinase inhibitor activity	0.000679636	0.0395962	0	0	10	69
GO:0086006 voltage-gated sodium channel activity involved in cardiac muscle cell action potential	3	0.000735164	0.38	0.6	Molecular Function	GO:0086006	voltage-gated sodium channel activity involved in cardiac muscle cell action potential	0.000735164	0.0410467	0	0	3	5
GO:0016538 cyclin-dependent protein serine/threonine kinase regulator activity	8	0.000783446	1.014	0.17	Molecular Function	GO:0016538	cyclin-dependent protein serine/threonine kinase regulator activity	0.000783446	0.0419927	0	0	8	47
GO:0019210 kinase inhibitor activity	10	0.00106502	1.267	0.137	Molecular Function	GO:0019210	kinase inhibitor activity	0.00106502	0.0548894	0	0	10	73
GO:0008134 transcription factor binding	46	0.00111246	5.83	0.069	Molecular Function	GO:0008134	transcription factor binding	0.00111246	0.0552111	0	0	46	669
GO:0004861 cyclin-dependent protein serine/threonine kinase inhibitor activity	4	0.00125811	0.507	0.333	Molecular Function	GO:0004861	cyclin-dependent protein serine/threonine kinase inhibitor activity	0.00125811	0.0602095	0	0	4	12
GO:0043167 ion binding	311	0.00169882	39.417	0.049	Molecular Function	GO:0043167	ion binding	0.00169882	0.0713037	0	0	311	6344
GO:0001228 DNA-binding transcription activator activity, RNA polymerase II-specific	33	0.00170306	4.183	0.074	Molecular Function	GO:0001228	DNA-binding transcription activator activity, RNA polymerase II-specific	0.00170306	0.0713037	0	0	33	446
GO:0016247 channel regulator activity	15	0.00174777	1.901	0.101	Molecular Function	GO:0016247	channel regulator activity	0.00174777	0.0713037	0	0	15	148
GO:0008179 adenylate cyclase binding	4	0.00175599	0.507	0.308	Molecular Function	GO:0008179	adenylate cyclase binding	0.00175599	0.0713037	0	0	4	13
GO:0017017 MAP kinase tyrosine/serine/threonine phosphatase activity	4	0.00175599	0.507	0.308	Molecular Function	GO:0017017	MAP kinase tyrosine/serine/threonine phosphatase activity	0.00175599	0.0713037	0	0	4	13
GO:0072349 modified amino acid transmembrane transporter activity	5	0.0020464	0.634	0.227	Molecular Function	GO:0072349	modified amino acid transmembrane transporter activity	0.0020464	0.0806521	0	0	5	22
GO:0019901 protein kinase binding	45	0.00242372	5.703	0.066	Molecular Function	GO:0019901	protein kinase binding	0.00242372	0.0927937	0	0	45	677
GO:0033549 MAP kinase phosphatase activity	4	0.00313055	0.507	0.267	Molecular Function	GO:0033549	MAP kinase phosphatase activity	0.00313055	0.116526	0	0	4	15
GO:0043169 cation binding	219	0.0033839	27.757	0.05	Molecular Function	GO:0043169	cation binding	0.0033839	0.122552	0	0	219	4349
GO:0046872 metal ion binding	215	0.00355305	27.25	0.05	Molecular Function	GO:0046872	metal ion binding	0.00355305	0.125292	0	0	215	4265
GO:0030371 translation repressor activity	5	0.00371232	0.634	0.2	Molecular Function	GO:0030371	translation repressor activity	0.00371232	0.127552	0	0	5	25
GO:0017025 TBP-class protein binding	5	0.00443657	0.634	0.192	Molecular Function	GO:0017025	TBP-class protein binding	0.00443657	0.146246	0	0	5	26
GO:0042802 identical protein binding	112	0.00482734	14.195	0.054	Molecular Function	GO:0042802	identical protein binding	0.00482734	0.146246	0	0	112	2063
GO:0019900 kinase binding	48	0.0049976	6.084	0.063	Molecular Function	GO:0019900	kinase binding	0.0049976	0.146246	0	0	48	762
GO:0005009 insulin-activated receptor activity	2	0.0053478	0.253	0.667	Molecular Function	GO:0005009	insulin-activated receptor activity	0.0053478	0.146246	0	0	2	3
GO:0008384 IkappaB kinase activity	2	0.0053478	0.253	0.667	Molecular Function	GO:0008384	IkappaB kinase activity	0.0053478	0.146246	0	0	2	3
GO:0016262 protein N-acetylglucosaminyltransferase activity	2	0.0053478	0.253	0.667	Molecular Function	GO:0016262	protein N-acetylglucosaminyltransferase activity	0.0053478	0.146246	0	0	2	3
GO:0050682 AF-2 domain binding	2	0.0053478	0.253	0.667	Molecular Function	GO:0050682	AF-2 domain binding	0.0053478	0.146246	0	0	2	3
GO:0051425 PTB domain binding	2	0.0053478	0.253	0.667	Molecular Function	GO:0051425	PTB domain binding	0.0053478	0.146246	0	0	2	3
GO:0097363 protein O-GlcNAc transferase activity	2	0.0053478	0.253	0.667	Molecular Function	GO:0097363	protein O-GlcNAc transferase activity	0.0053478	0.146246	0	0	2	3
GO:0099508 voltage-gated ion channel activity involved in regulation of presynaptic membrane potential	2	0.0053478	0.253	0.667	Molecular Function	GO:0099508	voltage-gated ion channel activity involved in regulation of presynaptic membrane potential	0.0053478	0.146246	0	0	2	3
GO:0005201 extracellular matrix structural constituent	15	0.00616849	1.901	0.089	Molecular Function	GO:0005201	extracellular matrix structural constituent	0.00616849	0.163268	0	0	15	169
GO:1901363 heterocyclic compound binding	288	0.00628593	36.502	0.048	Molecular Function	GO:1901363	heterocyclic compound binding	0.00628593	0.163268	0	0	288	5953
GO:0016500 protein-hormone receptor activity	4	0.00633576	0.507	0.222	Molecular Function	GO:0016500	protein-hormone receptor activity	0.00633576	0.163268	0	0	4	18
GO:0016301 kinase activity	49	0.00656788	6.21	0.062	Molecular Function	GO:0016301	kinase activity	0.00656788	0.163645	0	0	49	793
GO:0005516 calmodulin binding	17	0.00659466	2.155	0.084	Molecular Function	GO:0005516	calmodulin binding	0.00659466	0.163645	0	0	17	203
GO:0004672 protein kinase activity	38	0.0069408	4.816	0.065	Molecular Function	GO:0004672	protein kinase activity	0.0069408	0.169103	0	0	38	583
GO:0097159 organic cyclic compound binding	291	0.00710855	36.882	0.048	Molecular Function	GO:0097159	organic cyclic compound binding	0.00710855	0.170097	0	0	291	6034
GO:0019887 protein kinase regulator activity	16	0.00746047	2.028	0.085	Molecular Function	GO:0019887	protein kinase regulator activity	0.00746047	0.17287	0	0	16	189
GO:0061665 SUMO ligase activity	3	0.00750769	0.38	0.3	Molecular Function	GO:0061665	SUMO ligase activity	0.00750769	0.17287	0	0	3	10
GO:0019838 growth factor binding	13	0.00763132	1.648	0.092	Molecular Function	GO:0019838	growth factor binding	0.00763132	0.17287	0	0	13	141
GO:0001227 DNA-binding transcription repressor activity, RNA polymerase II-specific	23	0.00774045	2.915	0.074	Molecular Function	GO:0001227	DNA-binding transcription repressor activity, RNA polymerase II-specific	0.00774045	0.17287	0	0	23	310
GO:0019787 ubiquitin-like protein transferase activity	31	0.00838507	3.929	0.068	Molecular Function	GO:0019787	ubiquitin-like protein transferase activity	0.00838507	0.184197	0	0	31	458
GO:0001091 RNA polymerase II basal transcription factor binding	4	0.00937312	0.507	0.2	Molecular Function	GO:0001091	RNA polymerase II basal transcription factor binding	0.00937312	0.198929	0	0	4	20
GO:0035198 miRNA binding	5	0.00960943	0.634	0.161	Molecular Function	GO:0035198	miRNA binding	0.00960943	0.198929	0	0	5	31
GO:0043621 protein self-association	7	0.00965746	0.887	0.125	Molecular Function	GO:0043621	protein self-association	0.00965746	0.198929	0	0	7	56
GO:0043560 insulin receptor substrate binding	3	0.00999755	0.38	0.273	Molecular Function	GO:0043560	insulin receptor substrate binding	0.00999755	0.198929	0	0	3	11
GO:0048407 platelet-derived growth factor binding	3	0.00999755	0.38	0.273	Molecular Function	GO:0048407	platelet-derived growth factor binding	0.00999755	0.198929	0	0	3	11
GO:0004370 glycerol kinase activity	2	0.0103918	0.253	0.5	Molecular Function	GO:0004370	glycerol kinase activity	0.0103918	0.198929	0	0	2	4
GO:0004939 beta-adrenergic receptor activity	2	0.0103918	0.253	0.5	Molecular Function	GO:0004939	beta-adrenergic receptor activity	0.0103918	0.198929	0	0	2	4
GO:0015184 L-cystine transmembrane transporter activity	2	0.0103918	0.253	0.5	Molecular Function	GO:0015184	L-cystine transmembrane transporter activity	0.0103918	0.198929	0	0	2	4
GO:0042731 PH domain binding	2	0.0103918	0.253	0.5	Molecular Function	GO:0042731	PH domain binding	0.0103918	0.198929	0	0	2	4
GO:0015605 organophosphate ester transmembrane transporter activity	5	0.0109963	0.634	0.156	Molecular Function	GO:0015605	organophosphate ester transmembrane transporter activity	0.0109963	0.204653	0	0	5	32
GO:0051019 mitogen-activated protein kinase binding	5	0.0109963	0.634	0.156	Molecular Function	GO:0051019	mitogen-activated protein kinase binding	0.0109963	0.204653	0	0	5	32
GO:0019789 SUMO transferase activity	4	0.011193	0.507	0.19	Molecular Function	GO:0019789	SUMO transferase activity	0.011193	0.205461	0	0	4	21
GO:1990841 promoter-specific chromatin binding	7	0.0116369	0.887	0.121	Molecular Function	GO:1990841	promoter-specific chromatin binding	0.0116369	0.210722	0	0	7	58
GO:0016740 transferase activity	122	0.0119879	15.463	0.052	Molecular Function	GO:0016740	transferase activity	0.0119879	0.214185	0	0	122	2342
GO:0019207 kinase regulator activity	17	0.0134599	2.155	0.078	Molecular Function	GO:0019207	kinase regulator activity	0.0134599	0.237319	0	0	17	219
GO:0016773 phosphotransferase activity, alcohol group as acceptor	42	0.0136801	5.323	0.061	Molecular Function	GO:0016773	phosphotransferase activity, alcohol group as acceptor	0.0136801	0.238069	0	0	42	688
GO:0015026 coreceptor activity	6	0.0146187	0.76	0.128	Molecular Function	GO:0015026	coreceptor activity	0.0146187	0.251142	0	0	6	47
GO:0001130 bacterial-type RNA polymerase transcription factor activity, sequence-specific DNA binding	4	0.0154787	0.507	0.174	Molecular Function	GO:0001130	bacterial-type RNA polymerase transcription factor activity, sequence-specific DNA binding	0.0154787	0.258206	0	0	4	23
GO:0044325 ion channel binding	12	0.0156161	1.521	0.087	Molecular Function	GO:0044325	ion channel binding	0.0156161	0.258206	0	0	12	138
GO:0031994 insulin-like growth factor I binding	3	0.0162571	0.38	0.231	Molecular Function	GO:0031994	insulin-like growth factor I binding	0.0162571	0.258206	0	0	3	13
GO:0015075 ion transmembrane transporter activity	51	0.0163788	6.464	0.058	Molecular Function	GO:0015075	ion transmembrane transporter activity	0.0163788	0.258206	0	0	51	876
GO:0016361 activin receptor activity, type I	2	0.0168296	0.253	0.4	Molecular Function	GO:0016361	activin receptor activity, type I	0.0168296	0.258206	0	0	2	5
GO:0042030 ATPase inhibitor activity	2	0.0168296	0.253	0.4	Molecular Function	GO:0042030	ATPase inhibitor activity	0.0168296	0.258206	0	0	2	5
GO:0043120 tumor necrosis factor binding	2	0.0168296	0.253	0.4	Molecular Function	GO:0043120	tumor necrosis factor binding	0.0168296	0.258206	0	0	2	5
GO:0043559 insulin binding	2	0.0168296	0.253	0.4	Molecular Function	GO:0043559	insulin binding	0.0168296	0.258206	0	0	2	5
GO:0051380 norepinephrine binding	2	0.0168296	0.253	0.4	Molecular Function	GO:0051380	norepinephrine binding	0.0168296	0.258206	0	0	2	5
GO:0019905 syntaxin binding	8	0.0171065	1.014	0.104	Molecular Function	GO:0019905	syntaxin binding	0.0171065	0.258206	0	0	8	77
GO:0022857 transmembrane transporter activity	61	0.0171495	7.731	0.056	Molecular Function	GO:0022857	transmembrane transporter activity	0.0171495	0.258206	0	0	61	1082
GO:0046873 metal ion transmembrane transporter activity	28	0.017852	3.549	0.065	Molecular Function	GO:0046873	metal ion transmembrane transporter activity	0.017852	0.265797	0	0	28	428
GO:0003730 mRNA 3'-UTR binding	9	0.0181673	1.141	0.097	Molecular Function	GO:0003730	mRNA 3'-UTR binding	0.0181673	0.267519	0	0	9	93
GO:0015238 drug transmembrane transporter activity	10	0.0185841	1.267	0.092	Molecular Function	GO:0015238	drug transmembrane transporter activity	0.0185841	0.270682	0	0	10	109
GO:0045182 translation regulator activity	7	0.0193173	0.887	0.109	Molecular Function	GO:0045182	translation regulator activity	0.0193173	0.275859	0	0	7	64
GO:0008509 anion transmembrane transporter activity	23	0.0193513	2.915	0.068	Molecular Function	GO:0008509	anion transmembrane transporter activity	0.0193513	0.275859	0	0	23	337
GO:0015215 nucleotide transmembrane transporter activity	4	0.0206727	0.507	0.16	Molecular Function	GO:0015215	nucleotide transmembrane transporter activity	0.0206727	0.277463	0	0	4	25
GO:0015932 nucleobase-containing compound transmembrane transporter activity	6	0.0212516	0.76	0.118	Molecular Function	GO:0015932	nucleobase-containing compound transmembrane transporter activity	0.0212516	0.277463	0	0	6	51
GO:0004674 protein serine/threonine kinase activity	28	0.022154	3.549	0.064	Molecular Function	GO:0004674	protein serine/threonine kinase activity	0.022154	0.277463	0	0	28	436
GO:0001085 RNA polymerase II transcription factor binding	12	0.0221763	1.521	0.083	Molecular Function	GO:0001085	RNA polymerase II transcription factor binding	0.0221763	0.277463	0	0	12	145
GO:0061980 regulatory RNA binding	5	0.0222271	0.634	0.132	Molecular Function	GO:0061980	regulatory RNA binding	0.0222271	0.277463	0	0	5	38
GO:0022836 gated channel activity	23	0.0225309	2.915	0.067	Molecular Function	GO:0022836	gated channel activity	0.0225309	0.277463	0	0	23	342
GO:0000149 SNARE binding	10	0.0232827	1.267	0.088	Molecular Function	GO:0000149	SNARE binding	0.0232827	0.277463	0	0	10	113
GO:0005215 transporter activity	65	0.0235767	8.238	0.055	Molecular Function	GO:0005215	transporter activity	0.0235767	0.277463	0	0	65	1184
GO:0008139 nuclear localization sequence binding	4	0.0236247	0.507	0.154	Molecular Function	GO:0008139	nuclear localization sequence binding	0.0236247	0.277463	0	0	4	26
GO:0000900 translation repressor activity, mRNA regulatory element binding	3	0.0242711	0.38	0.2	Molecular Function	GO:0000900	translation repressor activity, mRNA regulatory element binding	0.0242711	0.277463	0	0	3	15
GO:0001216 bacterial-type RNA polymerase transcriptional activator activity, sequence-specific DNA binding	3	0.0242711	0.38	0.2	Molecular Function	GO:0001216	bacterial-type RNA polymerase transcriptional activator activity, sequence-specific DNA binding	0.0242711	0.277463	0	0	3	15
GO:0008194 UDP-glycosyltransferase activity	12	0.0243784	1.521	0.082	Molecular Function	GO:0008194	UDP-glycosyltransferase activity	0.0243784	0.277463	0	0	12	147
GO:0002151 G-quadruplex RNA binding	2	0.0245327	0.253	0.333	Molecular Function	GO:0002151	G-quadruplex RNA binding	0.0245327	0.277463	0	0	2	6
GO:0050544 arachidonic acid binding	2	0.0245327	0.253	0.333	Molecular Function	GO:0050544	arachidonic acid binding	0.0245327	0.277463	0	0	2	6
GO:0051434 BH3 domain binding	2	0.0245327	0.253	0.333	Molecular Function	GO:0051434	BH3 domain binding	0.0245327	0.277463	0	0	2	6
GO:0051575 5'-deoxyribose-5-phosphate lyase activity	2	0.0245327	0.253	0.333	Molecular Function	GO:0051575	5'-deoxyribose-5-phosphate lyase activity	0.0245327	0.277463	0	0	2	6
GO:0005244 voltage-gated ion channel activity	15	0.0255872	1.901	0.075	Molecular Function	GO:0005244	voltage-gated ion channel activity	0.0255872	0.277463	0	0	15	200
GO:0001540 amyloid-beta binding	8	0.0257045	1.014	0.096	Molecular Function	GO:0001540	amyloid-beta binding	0.0257045	0.277463	0	0	8	83
GO:0033613 activating transcription factor binding	8	0.0257045	1.014	0.096	Molecular Function	GO:0033613	activating transcription factor binding	0.0257045	0.277463	0	0	8	83
GO:0003676 nucleic acid binding	194	0.0263333	24.588	0.049	Molecular Function	GO:0003676	nucleic acid binding	0.0263333	0.277463	0	0	194	3997
GO:0042803 protein homodimerization activity	40	0.0263652	5.07	0.059	Molecular Function	GO:0042803	protein homodimerization activity	0.0263652	0.277463	0	0	40	679
GO:0008022 protein C-terminus binding	15	0.026602	1.901	0.075	Molecular Function	GO:0008022	protein C-terminus binding	0.026602	0.277463	0	0	15	201
GO:0022832 voltage-gated channel activity	15	0.026602	1.901	0.075	Molecular Function	GO:0022832	voltage-gated channel activity	0.026602	0.277463	0	0	15	201
GO:0090482 vitamin transmembrane transporter activity	4	0.0268192	0.507	0.148	Molecular Function	GO:0090482	vitamin transmembrane transporter activity	0.0268192	0.277463	0	0	4	27
GO:0016772 transferase activity, transferring phosphorus-containing groups	53	0.0278489	6.717	0.056	Molecular Function	GO:0016772	transferase activity, transferring phosphorus-containing groups	0.0278489	0.277463	0	0	53	946
GO:0030554 adenyl nucleotide binding	83	0.0281275	10.52	0.053	Molecular Function	GO:0030554	adenyl nucleotide binding	0.0281275	0.277463	0	0	83	1575
GO:0005159 insulin-like growth factor receptor binding	3	0.0289412	0.38	0.188	Molecular Function	GO:0005159	insulin-like growth factor receptor binding	0.0289412	0.277463	0	0	3	16
GO:0017081 chloride channel regulator activity	3	0.0289412	0.38	0.188	Molecular Function	GO:0017081	chloride channel regulator activity	0.0289412	0.277463	0	0	3	16
GO:0035497 cAMP response element binding	3	0.0289412	0.38	0.188	Molecular Function	GO:0035497	cAMP response element binding	0.0289412	0.277463	0	0	3	16
GO:0046983 protein dimerization activity	59	0.0292524	7.478	0.055	Molecular Function	GO:0046983	protein dimerization activity	0.0292524	0.277463	0	0	59	1073
GO:0061659 ubiquitin-like protein ligase activity	21	0.0326002	2.662	0.066	Molecular Function	GO:0061659	ubiquitin-like protein ligase activity	0.0326002	0.277463	0	0	21	317
GO:0008138 protein tyrosine/serine/threonine phosphatase activity	5	0.0327887	0.634	0.119	Molecular Function	GO:0008138	protein tyrosine/serine/threonine phosphatase activity	0.0327887	0.277463	0	0	5	42
GO:0005004 GPI-linked ephrin receptor activity	2	0.0333811	0.253	0.286	Molecular Function	GO:0005004	GPI-linked ephrin receptor activity	0.0333811	0.277463	0	0	2	7
GO:0005114 type II transforming growth factor beta receptor binding	2	0.0333811	0.253	0.286	Molecular Function	GO:0005114	type II transforming growth factor beta receptor binding	0.0333811	0.277463	0	0	2	7
GO:0050542 icosanoid binding	2	0.0333811	0.253	0.286	Molecular Function	GO:0050542	icosanoid binding	0.0333811	0.277463	0	0	2	7
GO:0050543 icosatetraenoic acid binding	2	0.0333811	0.253	0.286	Molecular Function	GO:0050543	icosatetraenoic acid binding	0.0333811	0.277463	0	0	2	7
GO:0009881 photoreceptor activity	3	0.0340504	0.38	0.176	Molecular Function	GO:0009881	photoreceptor activity	0.0340504	0.277463	0	0	3	17
GO:0031420 alkali metal ion binding	3	0.0340504	0.38	0.176	Molecular Function	GO:0031420	alkali metal ion binding	0.0340504	0.277463	0	0	3	17
GO:0004842 ubiquitin-protein transferase activity	27	0.0352163	3.422	0.062	Molecular Function	GO:0004842	ubiquitin-protein transferase activity	0.0352163	0.277463	0	0	27	435
GO:0015077 monovalent inorganic cation transmembrane transporter activity	24	0.0352907	3.042	0.064	Molecular Function	GO:0015077	monovalent inorganic cation transmembrane transporter activity	0.0352907	0.277463	0	0	24	377
GO:0060590 ATPase regulator activity	5	0.0358422	0.634	0.116	Molecular Function	GO:0060590	ATPase regulator activity	0.0358422	0.277463	0	0	5	43
GO:0019955 cytokine binding	11	0.0384733	1.394	0.079	Molecular Function	GO:0019955	cytokine binding	0.0384733	0.277463	0	0	11	140
GO:0042887 amide transmembrane transporter activity	6	0.040018	0.76	0.102	Molecular Function	GO:0042887	amide transmembrane transporter activity	0.040018	0.277463	0	0	6	59
GO:0032559 adenyl ribonucleotide binding	81	0.0411369	10.266	0.052	Molecular Function	GO:0032559	adenyl ribonucleotide binding	0.0411369	0.277463	0	0	81	1562
GO:0005524 ATP binding	78	0.042277	9.886	0.052	Molecular Function	GO:0005524	ATP binding	0.042277	0.277463	0	0	78	1500
GO:0002953 5'-deoxynucleotidase activity	1	0.0428618	0.127	1	Molecular Function	GO:0002953	5'-deoxynucleotidase activity	0.0428618	0.277463	0	0	1	1
GO:0003952 NAD+ synthase (glutamine-hydrolyzing) activity	1	0.0428618	0.127	1	Molecular Function	GO:0003952	NAD+ synthase (glutamine-hydrolyzing) activity	0.0428618	0.277463	0	0	1	1
GO:0003963 RNA-3'-phosphate cyclase activity	1	0.0428618	0.127	1	Molecular Function	GO:0003963	RNA-3'-phosphate cyclase activity	0.0428618	0.277463	0	0	1	1
GO:0003974 UDP-N-acetylglucosamine 4-epimerase activity	1	0.0428618	0.127	1	Molecular Function	GO:0003974	UDP-N-acetylglucosamine 4-epimerase activity	0.0428618	0.277463	0	0	1	1
GO:0003978 UDP-glucose 4-epimerase activity	1	0.0428618	0.127	1	Molecular Function	GO:0003978	UDP-glucose 4-epimerase activity	0.0428618	0.277463	0	0	1	1
GO:0004149 dihydrolipoyllysine-residue succinyltransferase activity	1	0.0428618	0.127	1	Molecular Function	GO:0004149	dihydrolipoyllysine-residue succinyltransferase activity	0.0428618	0.277463	0	0	1	1
GO:0004336 galactosylceramidase activity	1	0.0428618	0.127	1	Molecular Function	GO:0004336	galactosylceramidase activity	0.0428618	0.277463	0	0	1	1
GO:0004394 heparan sulfate 2-O-sulfotransferase activity	1	0.0428618	0.127	1	Molecular Function	GO:0004394	heparan sulfate 2-O-sulfotransferase activity	0.0428618	0.277463	0	0	1	1
GO:0004567 beta-mannosidase activity	1	0.0428618	0.127	1	Molecular Function	GO:0004567	beta-mannosidase activity	0.0428618	0.277463	0	0	1	1
GO:0004671 protein C-terminal S-isoprenylcysteine carboxyl O-methyltransferase activity	1	0.0428618	0.127	1	Molecular Function	GO:0004671	protein C-terminal S-isoprenylcysteine carboxyl O-methyltransferase activity	0.0428618	0.277463	0	0	1	1
GO:0004686 elongation factor-2 kinase activity	1	0.0428618	0.127	1	Molecular Function	GO:0004686	elongation factor-2 kinase activity	0.0428618	0.277463	0	0	1	1
GO:0004835 tubulin-tyrosine ligase activity	1	0.0428618	0.127	1	Molecular Function	GO:0004835	tubulin-tyrosine ligase activity	0.0428618	0.277463	0	0	1	1
GO:0004903 growth hormone receptor activity	1	0.0428618	0.127	1	Molecular Function	GO:0004903	growth hormone receptor activity	0.0428618	0.277463	0	0	1	1
GO:0004941 beta2-adrenergic receptor activity	1	0.0428618	0.127	1	Molecular Function	GO:0004941	beta2-adrenergic receptor activity	0.0428618	0.277463	0	0	1	1
GO:0005141 interleukin-10 receptor binding	1	0.0428618	0.127	1	Molecular Function	GO:0005141	interleukin-10 receptor binding	0.0428618	0.277463	0	0	1	1
GO:0005144 interleukin-13 receptor binding	1	0.0428618	0.127	1	Molecular Function	GO:0005144	interleukin-13 receptor binding	0.0428618	0.277463	0	0	1	1
GO:0005287 high-affinity basic amino acid transmembrane transporter activity	1	0.0428618	0.127	1	Molecular Function	GO:0005287	high-affinity basic amino acid transmembrane transporter activity	0.0428618	0.277463	0	0	1	1
GO:0005289 high-affinity arginine transmembrane transporter activity	1	0.0428618	0.127	1	Molecular Function	GO:0005289	high-affinity arginine transmembrane transporter activity	0.0428618	0.277463	0	0	1	1
GO:0005292 high-affinity lysine transmembrane transporter activity	1	0.0428618	0.127	1	Molecular Function	GO:0005292	high-affinity lysine transmembrane transporter activity	0.0428618	0.277463	0	0	1	1
GO:0008120 ceramide glucosyltransferase activity	1	0.0428618	0.127	1	Molecular Function	GO:0008120	ceramide glucosyltransferase activity	0.0428618	0.277463	0	0	1	1
GO:0008460 dTDP-glucose 4,6-dehydratase activity	1	0.0428618	0.127	1	Molecular Function	GO:0008460	dTDP-glucose 4,6-dehydratase activity	0.0428618	0.277463	0	0	1	1
GO:0008470 isovaleryl-CoA dehydrogenase activity	1	0.0428618	0.127	1	Molecular Function	GO:0008470	isovaleryl-CoA dehydrogenase activity	0.0428618	0.277463	0	0	1	1
GO:0008523 sodium-dependent multivitamin transmembrane transporter activity	1	0.0428618	0.127	1	Molecular Function	GO:0008523	sodium-dependent multivitamin transmembrane transporter activity	0.0428618	0.277463	0	0	1	1
GO:0009673 low-affinity phosphate transmembrane transporter activity	1	0.0428618	0.127	1	Molecular Function	GO:0009673	low-affinity phosphate transmembrane transporter activity	0.0428618	0.277463	0	0	1	1
GO:0015195 L-threonine transmembrane transporter activity	1	0.0428618	0.127	1	Molecular Function	GO:0015195	L-threonine transmembrane transporter activity	0.0428618	0.277463	0	0	1	1
GO:0015233 pantothenate transmembrane transporter activity	1	0.0428618	0.127	1	Molecular Function	GO:0015233	pantothenate transmembrane transporter activity	0.0428618	0.277463	0	0	1	1
GO:0016751 S-succinyltransferase activity	1	0.0428618	0.127	1	Molecular Function	GO:0016751	S-succinyltransferase activity	0.0428618	0.277463	0	0	1	1
GO:0017065 single-strand selective uracil DNA N-glycosylase activity	1	0.0428618	0.127	1	Molecular Function	GO:0017065	single-strand selective uracil DNA N-glycosylase activity	0.0428618	0.277463	0	0	1	1
GO:0017089 glycolipid transporter activity	1	0.0428618	0.127	1	Molecular Function	GO:0017089	glycolipid transporter activity	0.0428618	0.277463	0	0	1	1
GO:0017188 aspartate N-acetyltransferase activity	1	0.0428618	0.127	1	Molecular Function	GO:0017188	aspartate N-acetyltransferase activity	0.0428618	0.277463	0	0	1	1
GO:0019912 cyclin-dependent protein kinase activating kinase activity	1	0.0428618	0.127	1	Molecular Function	GO:0019912	cyclin-dependent protein kinase activating kinase activity	0.0428618	0.277463	0	0	1	1
GO:0030366 molybdopterin synthase activity	1	0.0428618	0.127	1	Molecular Function	GO:0030366	molybdopterin synthase activity	0.0428618	0.277463	0	0	1	1
GO:0030380 interleukin-17E receptor binding	1	0.0428618	0.127	1	Molecular Function	GO:0030380	interleukin-17E receptor binding	0.0428618	0.277463	0	0	1	1
GO:0030527 structural constituent of chromatin	1	0.0428618	0.127	1	Molecular Function	GO:0030527	structural constituent of chromatin	0.0428618	0.277463	0	0	1	1
GO:0031707 endothelin A receptor binding	1	0.0428618	0.127	1	Molecular Function	GO:0031707	endothelin A receptor binding	0.0428618	0.277463	0	0	1	1
GO:0031775 lutropin-choriogonadotropic hormone receptor binding	1	0.0428618	0.127	1	Molecular Function	GO:0031775	lutropin-choriogonadotropic hormone receptor binding	0.0428618	0.277463	0	0	1	1
GO:0032896 palmitoyl-CoA 9-desaturase activity	1	0.0428618	0.127	1	Molecular Function	GO:0032896	palmitoyl-CoA 9-desaturase activity	0.0428618	0.277463	0	0	1	1
GO:0033781 cholesterol 24-hydroxylase activity	1	0.0428618	0.127	1	Molecular Function	GO:0033781	cholesterol 24-hydroxylase activity	0.0428618	0.277463	0	0	1	1
GO:0033819 lipoyl(octanoyl) transferase activity	1	0.0428618	0.127	1	Molecular Function	GO:0033819	lipoyl(octanoyl) transferase activity	0.0428618	0.277463	0	0	1	1
GO:0033925 mannosyl-glycoprotein endo-beta-N-acetylglucosaminidase activity	1	0.0428618	0.127	1	Molecular Function	GO:0033925	mannosyl-glycoprotein endo-beta-N-acetylglucosaminidase activity	0.0428618	0.277463	0	0	1	1
GO:0034590 L-hydroxyproline transmembrane transporter activity	1	0.0428618	0.127	1	Molecular Function	GO:0034590	L-hydroxyproline transmembrane transporter activity	0.0428618	0.277463	0	0	1	1
GO:0035501 MH1 domain binding	1	0.0428618	0.127	1	Molecular Function	GO:0035501	MH1 domain binding	0.0428618	0.277463	0	0	1	1
GO:0035757 chemokine (C-C motif) ligand 19 binding	1	0.0428618	0.127	1	Molecular Function	GO:0035757	chemokine (C-C motif) ligand 19 binding	0.0428618	0.277463	0	0	1	1
GO:0035758 chemokine (C-C motif) ligand 21 binding	1	0.0428618	0.127	1	Molecular Function	GO:0035758	chemokine (C-C motif) ligand 21 binding	0.0428618	0.277463	0	0	1	1
GO:0038117 C-C motif chemokine 19 receptor activity	1	0.0428618	0.127	1	Molecular Function	GO:0038117	C-C motif chemokine 19 receptor activity	0.0428618	0.277463	0	0	1	1
GO:0038121 C-C motif chemokine 21 receptor activity	1	0.0428618	0.127	1	Molecular Function	GO:0038121	C-C motif chemokine 21 receptor activity	0.0428618	0.277463	0	0	1	1
GO:0044013 H2B histone acetyltransferase activity	1	0.0428618	0.127	1	Molecular Function	GO:0044013	H2B histone acetyltransferase activity	0.0428618	0.277463	0	0	1	1
GO:0045515 interleukin-18 receptor binding	1	0.0428618	0.127	1	Molecular Function	GO:0045515	interleukin-18 receptor binding	0.0428618	0.277463	0	0	1	1
GO:0047016 cholest-5-ene-3-beta,7-alpha-diol 3-beta-dehydrogenase activity	1	0.0428618	0.127	1	Molecular Function	GO:0047016	cholest-5-ene-3-beta,7-alpha-diol 3-beta-dehydrogenase activity	0.0428618	0.277463	0	0	1	1
GO:0050121 N-acylglucosamine 2-epimerase activity	1	0.0428618	0.127	1	Molecular Function	GO:0050121	N-acylglucosamine 2-epimerase activity	0.0428618	0.277463	0	0	1	1
GO:0050785 advanced glycation end-product receptor activity	1	0.0428618	0.127	1	Molecular Function	GO:0050785	advanced glycation end-product receptor activity	0.0428618	0.277463	0	0	1	1
GO:0051732 polyribonucleotide kinase activity	1	0.0428618	0.127	1	Molecular Function	GO:0051732	polyribonucleotide kinase activity	0.0428618	0.277463	0	0	1	1
GO:0051736 ATP-dependent polyribonucleotide 5'-hydroxyl-kinase activity	1	0.0428618	0.127	1	Molecular Function	GO:0051736	ATP-dependent polyribonucleotide 5'-hydroxyl-kinase activity	0.0428618	0.277463	0	0	1	1
GO:0052717 tRNA-specific adenosine-34 deaminase activity	1	0.0428618	0.127	1	Molecular Function	GO:0052717	tRNA-specific adenosine-34 deaminase activity	0.0428618	0.277463	0	0	1	1
GO:0055103 ligase regulator activity	1	0.0428618	0.127	1	Molecular Function	GO:0055103	ligase regulator activity	0.0428618	0.277463	0	0	1	1
GO:0061770 translation elongation factor binding	1	0.0428618	0.127	1	Molecular Function	GO:0061770	translation elongation factor binding	0.0428618	0.277463	0	0	1	1
GO:0062072 H3K9me3 modified histone binding	1	0.0428618	0.127	1	Molecular Function	GO:0062072	H3K9me3 modified histone binding	0.0428618	0.277463	0	0	1	1
GO:0070123 transforming growth factor beta receptor activity, type III	1	0.0428618	0.127	1	Molecular Function	GO:0070123	transforming growth factor beta receptor activity, type III	0.0428618	0.277463	0	0	1	1
GO:0086039 calcium-transporting ATPase activity involved in regulation of cardiac muscle cell membrane potential	1	0.0428618	0.127	1	Molecular Function	GO:0086039	calcium-transporting ATPase activity involved in regulation of cardiac muscle cell membrane potential	0.0428618	0.277463	0	0	1	1
GO:0086060 voltage-gated sodium channel activity involved in AV node cell action potential	1	0.0428618	0.127	1	Molecular Function	GO:0086060	voltage-gated sodium channel activity involved in AV node cell action potential	0.0428618	0.277463	0	0	1	1
GO:0086061 voltage-gated sodium channel activity involved in bundle of His cell action potential	1	0.0428618	0.127	1	Molecular Function	GO:0086061	voltage-gated sodium channel activity involved in bundle of His cell action potential	0.0428618	0.277463	0	0	1	1
GO:0086063 voltage-gated sodium channel activity involved in SA node cell action potential	1	0.0428618	0.127	1	Molecular Function	GO:0086063	voltage-gated sodium channel activity involved in SA node cell action potential	0.0428618	0.277463	0	0	1	1
GO:0090422 thiamine pyrophosphate transmembrane transporter activity	1	0.0428618	0.127	1	Molecular Function	GO:0090422	thiamine pyrophosphate transmembrane transporter activity	0.0428618	0.277463	0	0	1	1
GO:0097161 DH domain binding	1	0.0428618	0.127	1	Molecular Function	GO:0097161	DH domain binding	0.0428618	0.277463	0	0	1	1
GO:0102555 octanoyl transferase activity (acting on glycine-cleavage complex H protein)	1	0.0428618	0.127	1	Molecular Function	GO:0102555	octanoyl transferase activity (acting on glycine-cleavage complex H protein)	0.0428618	0.277463	0	0	1	1
GO:0102769 dihydroceramide glucosyltransferase activity	1	0.0428618	0.127	1	Molecular Function	GO:0102769	dihydroceramide glucosyltransferase activity	0.0428618	0.277463	0	0	1	1
GO:1990238 double-stranded DNA endodeoxyribonuclease activity	1	0.0428618	0.127	1	Molecular Function	GO:1990238	double-stranded DNA endodeoxyribonuclease activity	0.0428618	0.277463	0	0	1	1
GO:1990439 MAP kinase serine/threonine phosphatase activity	1	0.0428618	0.127	1	Molecular Function	GO:1990439	MAP kinase serine/threonine phosphatase activity	0.0428618	0.277463	0	0	1	1
GO:0004679 AMP-activated protein kinase activity	2	0.0432627	0.253	0.25	Molecular Function	GO:0004679	AMP-activated protein kinase activity	0.0432627	0.278711	0	0	2	8
GO:0008324 cation transmembrane transporter activity	37	0.0434813	4.689	0.057	Molecular Function	GO:0008324	cation transmembrane transporter activity	0.0434813	0.27878	0	0	37	644
GO:0019904 protein domain specific binding	40	0.0442426	5.07	0.057	Molecular Function	GO:0019904	protein domain specific binding	0.0442426	0.28231	0	0	40	706
GO:0004675 transmembrane receptor protein serine/threonine kinase activity	3	0.0455626	0.38	0.158	Molecular Function	GO:0004675	transmembrane receptor protein serine/threonine kinase activity	0.0455626	0.286854	0	0	3	19
GO:0015216 purine nucleotide transmembrane transporter activity	3	0.0455626	0.38	0.158	Molecular Function	GO:0015216	purine nucleotide transmembrane transporter activity	0.0455626	0.286854	0	0	3	19
GO:0015267 channel activity	28	0.0458239	3.549	0.06	Molecular Function	GO:0015267	channel activity	0.0458239	0.286854	0	0	28	466
GO:0022803 passive transmembrane transporter activity	28	0.0458239	3.549	0.06	Molecular Function	GO:0022803	passive transmembrane transporter activity	0.0458239	0.286854	0	0	28	466
GO:1901682 sulfur compound transmembrane transporter activity	5	0.0460251	0.634	0.109	Molecular Function	GO:1901682	sulfur compound transmembrane transporter activity	0.0460251	0.286854	0	0	5	46
GO:0051184 cofactor transmembrane transporter activity	4	0.0465161	0.507	0.125	Molecular Function	GO:0051184	cofactor transmembrane transporter activity	0.0465161	0.288572	0	0	4	32
GO:0098772 molecular function regulator	95	0.0485155	12.041	0.051	Molecular Function	GO:0098772	molecular function regulator	0.0485155	0.299589	0	0	95	1878
